# Supplementary material for: Palladium-catalyzed regioselective decarboxylative hydroarylation of alkynyl carboxylic acids with arylboronic acids
Source: Royal Society of Chemistry journal article supplement (doi:10.1039/d3ob00454f), 2023-01-01

## *Supplementary Information*

# Palladium-catalyzed regioselective decarboxylative hydroarylation of alkynyl carboxylic acids with arylboronic acids

Zheng Dong, Ren-Jie Tong, Lei Xu, Hua-Jian Xu\* and Jun Xu\*

---

School of Food and Biological Engineering, Anhui Province Key Laboratory of Advance  
Catalytic Materials and Reaction Engineering, Hefei University of Technology, Hefei 230009,  
China.

[junxu@hfut.edu.cn](mailto:junxu@hfut.edu.cn) (J. Xu)

[hjxu@hfut.edu.cn](mailto:hjxu@hfut.edu.cn) (H.-J. Xu)

## ***Table of contents***

|                                                                   |           |
|-------------------------------------------------------------------|-----------|
| <b>1. General information.....</b>                                | <b>1</b>  |
| 1.1 Materials .....                                               | 1         |
| 1.2 Analytical methods .....                                      | 1         |
| <b>2. Optimization of reaction conditions .....</b>               | <b>2</b>  |
| Table S1. Optimization of the ligands .....                       | 2         |
| Table S2. Optimization of the reaction solvents.....              | 3         |
| Table S3. Optimization of the reaction bases .....                | 4         |
| Table S4. Optimization of the reaction parameters .....           | 5         |
| Table S5. Optimization of the palladium catalysts .....           | 6         |
| <b>3. Preparation of non-commercial substrates.....</b>           | <b>7</b>  |
| <b>4. Time-course reactions under the standard condition.....</b> | <b>8</b>  |
| 4.1 Identification of the possible intermediate.....              | 8         |
| 4.2 Control experiment .....                                      | 9         |
| <b>5. General procedure and characterization of products.....</b> | <b>10</b> |
| 5.1 General procedure .....                                       | 10        |
| 5.2 Characterization data for all products .....                  | 11        |
| <b>6. References .....</b>                                        | <b>23</b> |
| <b>7. Copies of NMR spectra .....</b>                             | <b>24</b> |

## 1. General information

### 1.1 Materials

The following chemicals were purchased and used as received:

Palladium chloride (cas: 7647-10-1, Adamas, 5 g), Palladium acetate (cas: 3375-31-3, Adamas, 5 g), other Palladium or Nickel catalyst (Energy or Adamas), Triphenylphosphine (cas: 603-35-0, Energy, 500 g), other Phosphines (Energy or Adamas), Arylboronic acids (Energy or Adamas), Phenylpropionic acid (cas: 637-44-5, Energy, 10 g), H<sub>2</sub>O (ultrapure water, conductivity = 0.055 μs/cm), Toluene (cas: 108-88-3, Sinopharm, 500 mL), Potassium acetate (cas: 127-08-2, Aladdin, 500 g).

### 1.2 Analytical methods

<sup>1</sup>H NMR, <sup>13</sup>C NMR and <sup>19</sup>F NMR spectra were recorded on a Bruker 400 MHz or Keysight 600 MHz spectrometer at 295 K in deuterated solvents. Chemical shifts are reported in ppm with the internal TMS signal at 0.0 ppm as a standard. The data is being reported as (s = singlet, d = doublet, t = triplet, q = quartet, m = multiplet or unresolved, coupling constant(s) in Hz, integration).

GC measurements were conducted on Thermo Fisher. HRMS ESI-mass data were acquired on Thermo LTQ Orbitrap XL instrument equipped with an ESI source and controlled by Xcalibur software.

Chromatographic purification of products was accomplished using forced-flow chromatography on silica gel (300-400 mesh).

## 2. Optimization of reaction conditions

Table S1. Optimization of the ligands

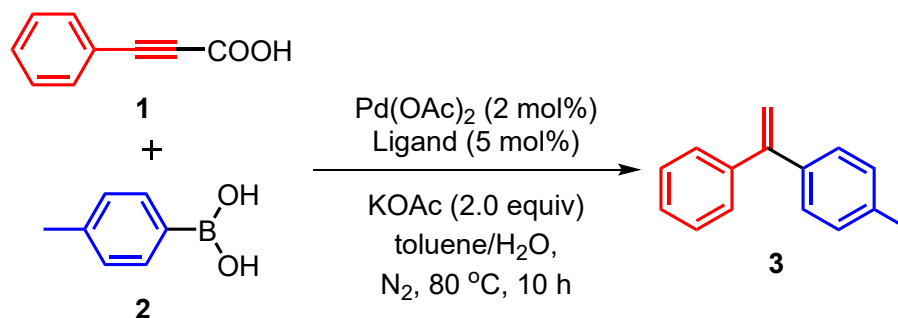

| Entry | Ligand                                   | Yield (%) <sup>b</sup> |
|-------|------------------------------------------|------------------------|
| 1     | PPh <sub>3</sub>                         | 88%                    |
| 2     | PCy <sub>3</sub>                         | 19%                    |
| 3     | 1,1'-bis(dicyclohexylphosphino)ferrocene | 9%                     |
| 4     | tri- <i>o</i> -tolylphosphine            | 34%                    |
| 5     | BINAP                                    | N.R.                   |
| 6     | dppb                                     | N.R.                   |
| 7     | XPhos                                    | 42%                    |
| 8     | dppf                                     | N.R.                   |
| 9     | XantPhos                                 | 40%                    |
| 10    | <i>t</i> -BuXPhos                        | N.R.                   |
| 11    | DpePhos                                  | N.R.                   |
| 12    | S-Phos                                   | 15%                    |

<sup>a</sup>Reaction conditions: **1** (0.30 mmol, 1.0 equiv), **2** (0.45 mmol, 1.5 equiv), potassium acetate (0.6 mmol, 2.0 equiv), Pd(OAc)<sub>2</sub> (0.006 mmol, 0.02 equiv), ligand (0.015 mmol, 0.05 equiv), toluene (3.0 mL), H<sub>2</sub>O (0.3 mL) under argon for 10 h (oil bath), unless otherwise noted. <sup>b</sup>All yields were determined by gas chromatography using biphenyl as an internal standard. N.R. = no reaction; BINAP = 1,1'-binaphthyl-2,2'-diphenylphosphine; dppb = 1,4-bis(diphenylphosphino)butane; Xphos = 2-(dicyclohexyl phosphino)-2',4',6'-tri-*i*-propyl-1,1'-biphenyl; dppf = 1,1'-Bis(diphenylphosphino)ferrocene; Xant-Phos = 4,5-bis(diphenylphosphino)-9,9-dimethylxanthene; *t*-BuXphos = 2-di-tert-butylphosphino-2',4',6'-triisopropyl biphenyl; DpePhos = Bis(2-diphenylphosphinophenyl) ether; S-phos = 2-dicyclohexylphosphino-2',6'-dimethoxy-1,1'-biphenyl.



**Table S2. Optimization of the reaction solvents**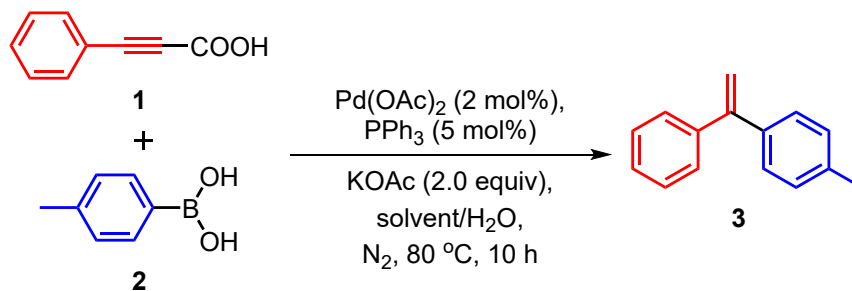

| Entry | Solvent                           | Yield (%) <sup>b</sup> |
|-------|-----------------------------------|------------------------|
| 1     | PhCl/H <sub>2</sub> O             | 80%                    |
| 2     | MeCN/H <sub>2</sub> O             | N.R.                   |
| 3     | acetone/H <sub>2</sub> O          | N.R.                   |
| 4     | 1,4-dioxane/H <sub>2</sub> O      | N.R.                   |
| 5     | DMC/H <sub>2</sub> O              | N.R.                   |
| 6     | NMP/H <sub>2</sub> O              | N.R.                   |
| 7     | THF/H <sub>2</sub> O              | N.R.                   |
| 8     | nitrobenzene/H <sub>2</sub> O     | 50%                    |
| 9     | DCE/H <sub>2</sub> O              | 61%                    |
| 10    | DMSO/H <sub>2</sub> O             | N.R.                   |
| 11    | DMF/H <sub>2</sub> O              | N.R.                   |
| 12    | <i>o</i> -xylene/H <sub>2</sub> O | 31%                    |

<sup>a</sup> Reaction conditions: **1** (0.30 mmol, 1.0 equiv), **2** (0.45 mmol, 1.5 equiv), Pd(OAc)<sub>2</sub> (0.006 mmol, 0.02 equiv), PPh<sub>3</sub> (0.015 mmol, 0.05 equiv), potassium acetate (0.6 mmol, 2.0 equiv), solvent (3.0 mL), H<sub>2</sub>O (0.3 mL) under argon for 10 h (oil bath), unless otherwise noted. <sup>b</sup> All yields were determined by gas chromatography using biphenyl as an internal standard. N.R. = no reaction; DMC = dimethyl carbonate; NMP = N-methyl-2-pyrrolidone; THF = tetrahydrofuran; DCE = 1,2-dichloroethane; DMSO = dimethyl sulfoxide; DMF = *N,N*-dimethylformamide.

**Table S3. Optimization of the reaction bases**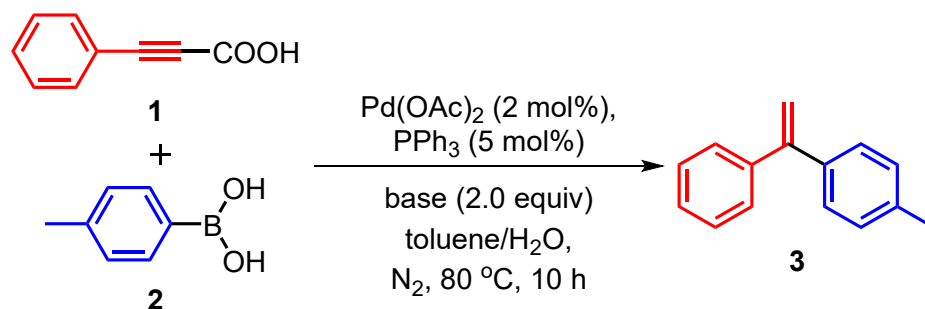

| Entry | Base                            | Yield (%) <sup>b</sup> |
|-------|---------------------------------|------------------------|
| 1     | DBU                             | N.R.                   |
| 2     | DIPEA                           | 37%                    |
| 3     | NEt <sub>3</sub>                | 56%                    |
| 4     | Na <sub>2</sub> CO <sub>3</sub> | N.R.                   |
| 5     | TMEDA                           | N.R.                   |
| 6     | CH <sub>3</sub> ONa             | 10%                    |
| 7     | NaHCO <sub>3</sub>              | N.R.                   |
| 8     | <i>t</i> -BuONa                 | N.R.                   |
| 9     | K <sub>2</sub> CO <sub>3</sub>  | N.R.                   |
| 10    | Cs <sub>2</sub> CO <sub>3</sub> | N.R.                   |

<sup>a</sup>Reaction conditions: **1** (0.30 mmol, 1.0 equiv), **2** (0.45 mmol, 1.5 equiv), base (0.6 mmol, 2.0 equiv), Pd(OAc)<sub>2</sub> (0.006 mmol, 0.02 equiv), PPh<sub>3</sub> (0.015 mmol, 0.05 equiv), toluene (3 mL), H<sub>2</sub>O (0.3 mL) under argon for 10 h (oil bath), unless otherwise noted. <sup>b</sup>All yields were determined by gas chromatography using biphenyl as an internal standard. N.R. = no reaction; DBU = 1,8-diazabicyclo[5.4.0]undec-7-ene; DIPEA = N,N-diisopropylethylamine; TMEDA = N,N,N',N'-tetramethyl-ethylenediamine.

**Table S4. Optimization of the reaction parameters**

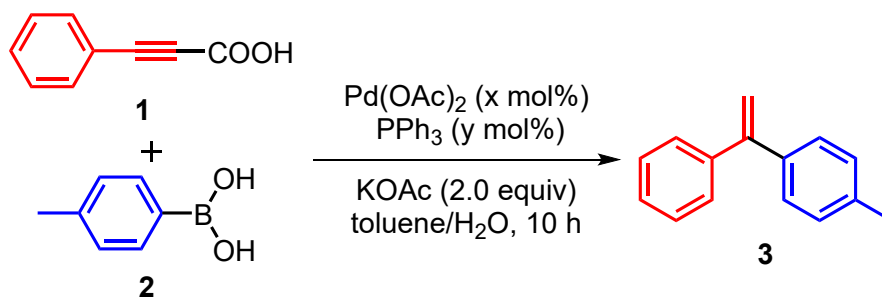

| Entry          | Catalyst | Ligand                     | Solvent                  | T/°C | Yield (%) <sup>b</sup> |
|----------------|----------|----------------------------|--------------------------|------|------------------------|
| 1              | 2 mol%   | PPh <sub>3</sub> (5 mol%)  | toluene/H <sub>2</sub> O | 80   | 88%                    |
| 2              | 2 mol%   | —                          | toluene/H <sub>2</sub> O | 80   | N.R.                   |
| 3              | 2 mol%   | PPh <sub>3</sub> (2 mol%)  | toluene/H <sub>2</sub> O | 80   | 62%                    |
| 4              | 2 mol%   | PPh <sub>3</sub> (10 mol%) | toluene/H <sub>2</sub> O | 80   | 85%                    |
| 5              | 2 mol%   | PPh <sub>3</sub> (5 mol%)  | toluene                  | 80   | N.R.                   |
| 6              | 2 mol%   | PPh <sub>3</sub> (5 mol%)  | toluene/EtOH             | 80   | N.R.                   |
| 7              | 2 mol%   | PPh <sub>3</sub> (5 mol%)  | toluene/AcOH             | 80   | N.R.                   |
| 8              | 2 mol%   | PPh <sub>3</sub> (5 mol%)  | toluene/MeOH             | 80   | 45%                    |
| 9 <sup>c</sup> | 2 mol%   | PPh <sub>3</sub> (5 mol%)  | toluene/H <sub>2</sub> O | 80   | 83%                    |
| 10             | 1 mol%   | PPh <sub>3</sub> (5 mol%)  | toluene/H <sub>2</sub> O | 80   | 78%                    |
| 11             | —        | PPh <sub>3</sub> (5 mol%)  | toluene/H <sub>2</sub> O | 80   | N.R.                   |
| 12             | 2 mol%   | PPh <sub>3</sub> (5 mol%)  | toluene/H <sub>2</sub> O | 60   | N.R.                   |
| 13             | 2 mol%   | PPh <sub>3</sub> (5 mol%)  | toluene/H <sub>2</sub> O | 100  | 84%                    |

<sup>a</sup>Reaction conditions: **1** (0.30 mmol, 1.0 equiv), **2** (0.45 mmol, 1.5 equiv), potassium acetate (0.6 mmol, 2.0 equiv), Pd(OAc)<sub>2</sub> (0.006 mmol, 0.02 equiv), PPh<sub>3</sub> (0.015 mmol, 0.05 equiv), toluene (3.0 mL), proton source (0.3 mL) under argon for 10 h (oil bath), unless otherwise noted. <sup>b</sup>All yields were determined by gas chromatography using biphenyl as an internal standard. <sup>c</sup>The amount of water in the reaction was increased to 0.5 mL; N.R. = no reaction.

**Table S5. Optimization of the palladium catalysts**

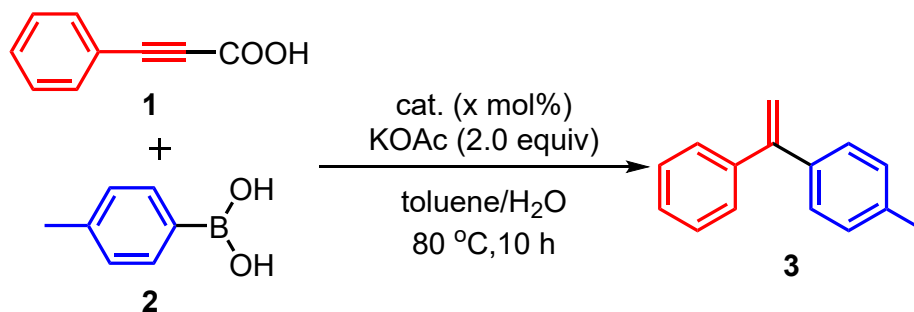

| Entry | Catalyst                                                                | Yield (%) <sup>b</sup> |
|-------|-------------------------------------------------------------------------|------------------------|
| 1     | Pd(OAc) <sub>2</sub> (2 mol%)                                           | N.R.                   |
| 2     | PdCl <sub>2</sub> (2 mol%)                                              | N.R.                   |
| 3     | Pd <sub>2</sub> (dba) <sub>3</sub> (2 mol%)                             | N.R.                   |
| 4     | Pd(acac) <sub>2</sub> (2 mol%)                                          | N.R.                   |
| 5     | PdCl <sub>2</sub> (2 mol%) + PPh <sub>3</sub> (5 mol%)                  | 78%                    |
| 6     | Pd <sub>2</sub> (dba) <sub>3</sub> (2 mol%) + PPh <sub>3</sub> (5 mol%) | 45%                    |
| 7     | <b>Pd(OAc)<sub>2</sub> (2 mol%) + PPh<sub>3</sub> (5 mol%)</b>          | <b>88%</b>             |
| 8     | Pd(PCy <sub>3</sub> ) <sub>2</sub> Cl <sub>2</sub> (2 mol%)             | 42%                    |
| 9     | Pd(PPh <sub>3</sub> ) <sub>2</sub> Cl <sub>2</sub> (2 mol%)             | 66%                    |
| 10    | NiCl <sub>2</sub> (dppp) (2 mol%)                                       | N.R.                   |
| 11    | Ni(PCy <sub>3</sub> ) <sub>2</sub> Cl <sub>2</sub> (2 mol%)             | N.R.                   |

<sup>a</sup> Reaction conditions: **1** (0.30 mmol, 1.0 equiv), **2** (0.45 mmol, 1.5 equiv), potassium acetate (0.6 mmol, 2.0 equiv), catalyst (0.006 mmol), toluene (3.0 mL), H<sub>2</sub>O (0.3 mL) under argon for 10 h (oil bath), unless otherwise noted. <sup>b</sup>All yields were determined by gas chromatography using biphenyl as an internal standard. N.R. = no reaction; Dppp = 1,3-Bis(diphenylphosphino)propane.

### 3. Preparation of non-commercial substrates

**1a<sup>1</sup>, 1b<sup>1</sup>, 1c<sup>1</sup>, 1d<sup>1</sup>, 1f<sup>1</sup>, 1g<sup>1</sup>, 1h<sup>1</sup>, 1i<sup>1</sup>, 1e<sup>2</sup>, 1j<sup>3</sup>, 1k<sup>4</sup>, 55<sup>5,6</sup>** were prepared according to the reported procedures.

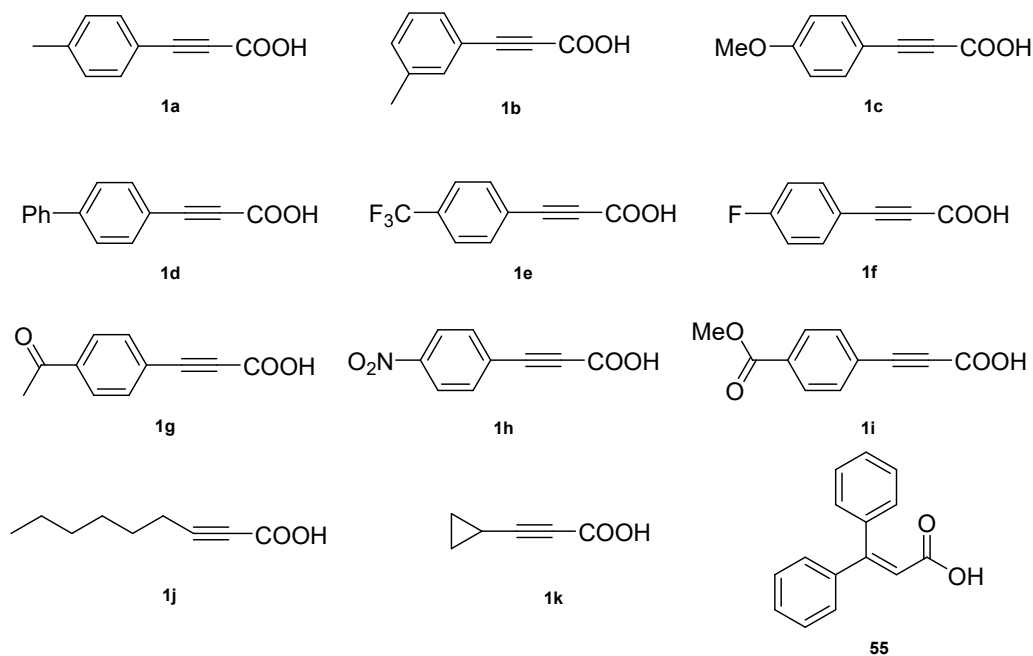

**Figure S1 Preparation of non-commercial substrates**

## 4. Time-course reactions under the standard condition.

### 4.1 Identification of the possible intermediate

To further probe the possible intermediate in the reaction, we conducted a collection of experiments with D<sub>2</sub>O under the standard condition by detecting the yields of the possible intermediate **57** and final product **43** at a different time (Figure S2). This experiment showed that the starting substrate **1** was rapidly decarboxylated to intermediate **57**, which subsequently underwent a further transformation into the deuterium-labeled alkenes **43**.

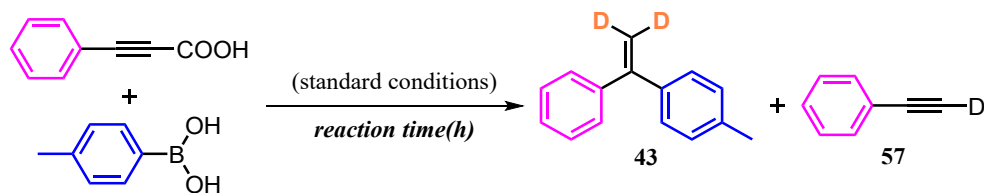

| entry | Time/h | <b>57</b> /yield% | <b>43</b> /yield% |
|-------|--------|-------------------|-------------------|
| 1     | 0      | 0                 | 0                 |
| 2     | 0.25   | 28                | 0                 |
| 3     | 0.5    | 42                | 0                 |
| 4     | 0.75   | 54                | 2                 |
| 5     | 1      | 60                | 4                 |
| 6     | 1.25   | 72                | 10                |
| 7     | 1.5    | 61                | 23                |
| 8     | 1.75   | 45                | 40                |
| 9     | 2.0    | 23                | 65                |
| 10    | 2.5    | 0                 | 77                |
| 11    | 3.0    | 0                 | 77                |
| 12    | 3.5    | 0                 | 77                |

For experimental details, see the general procedure B. All yields were determined by gas chromatography using biphenyl as an internal standard.

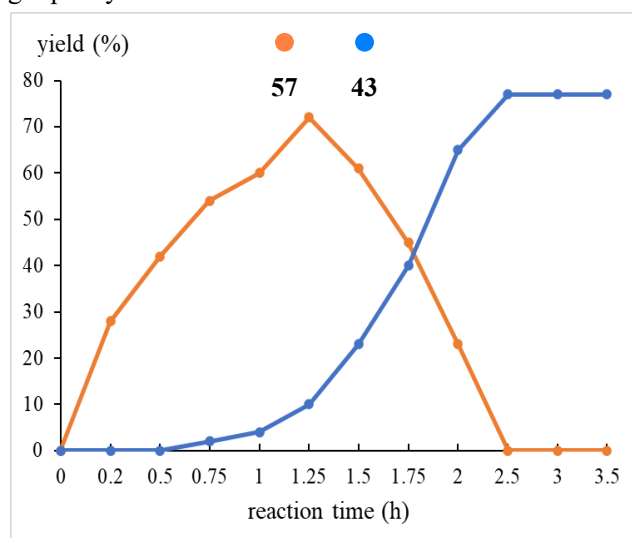

Figure S2 Time-course reactions under the standard condition.

## 4.2 Control experiment

To further probe whether alkynes can be converted to the desired product **43** with D<sub>2</sub>O under the standard conditions, we conducted a collection of experiments under the standard condition by detecting the yields of the substrate and final product at a different time (Figure S3). It is shown that alkyne can only be converted to mono-deuterated product **58** under the standard conditions.

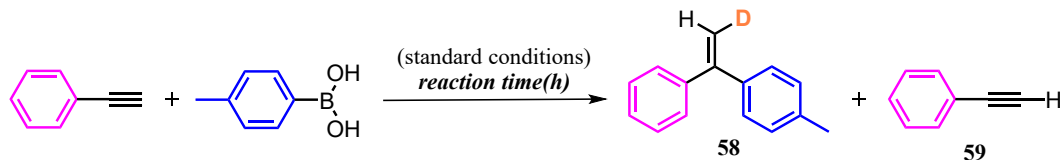

| entry | Time/h | <b>58</b> /yield% | <b>59</b> /yield% |
|-------|--------|-------------------|-------------------|
| 1     | 0      | 0                 | 100               |
| 2     | 0.25   | 3                 | 78                |
| 3     | 0.5    | 10                | 65                |
| 4     | 0.75   | 23                | 58                |
| 5     | 1      | 34                | 47                |
| 6     | 1.25   | 47                | 36                |
| 7     | 1.5    | 55                | 28                |
| 8     | 2.0    | 68                | 0                 |
| 9     | 2.5    | 68                | 0                 |

For experimental details, see the general procedure B. All yields were determined by gas chromatography using biphenyl as an internal standard.

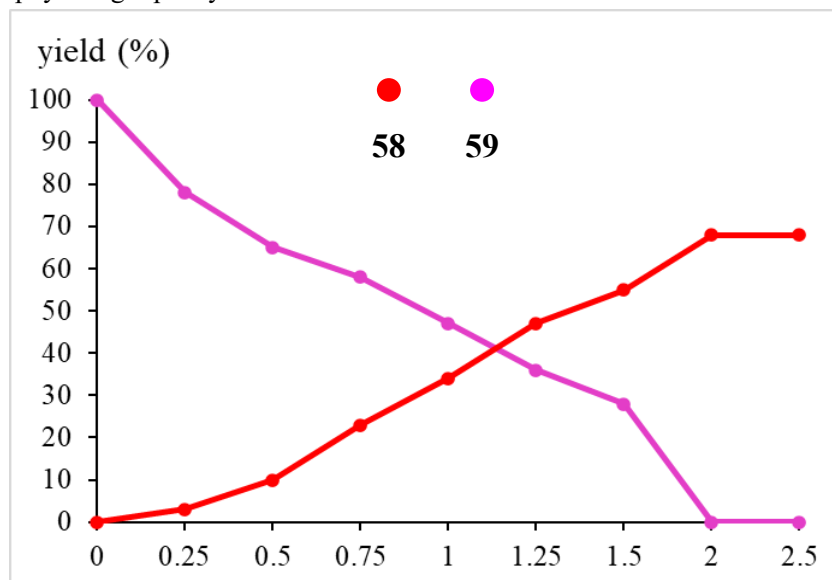

Figure S3 Time-course reactions under the standard condition.

## 5. General procedure and characterization of products

### 5.1 General procedure

#### procedure A:

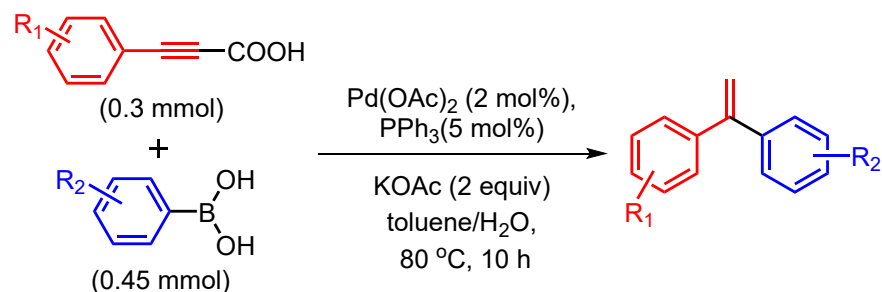

Arylpropionic acid (0.3 mmol, 1.0 equiv), arylboronic acid (0.45 mmol, 1.5 equiv), Pd(OAc)<sub>2</sub> (1.35mg, 0.006 mmol, 0.02 equiv), PPh<sub>3</sub> (4mg, 0.015 mmol, 0.05 equiv) and potassium acetate (60mg, 0.6 mmol, 2.0 equiv) were placed in a transparent Schlenk tube equipped with a stirring bar. The tube kept in vacuum then flushed with argon. This procedure was repeated for 3-4 times. The solvent (toluene = 3.0 mL, H<sub>2</sub>O = 0.3 mL) was added under argon atmosphere. The reaction mixture was stirred at 80 °C for 10 h (oil bath). Then the reaction mixture was cooled to room temperature, then extracted with ethyl acetate. The organic layers were combined and dried over Na<sub>2</sub>SO<sub>4</sub>, then concentrated under vacuo. The residue was purified by column chromatography on silica gel to afford the desired product (petroleum ether/ethyl acetate).

#### procedure B: Preparation of deuterium-labeled alkenes

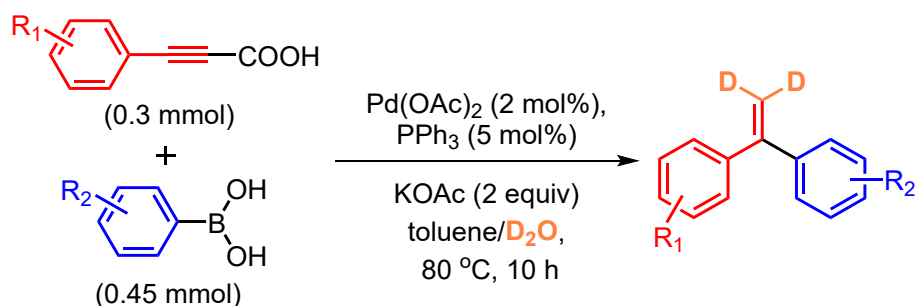

Arylpropionic acid (0.3 mmol, 1.0 equiv), arylboronic acid (0.45 mmol, 1.5 equiv), Pd(OAc)<sub>2</sub> (1.35mg, 0.006 mmol, 0.02 equiv), PPh<sub>3</sub> (4mg, 0.015 mmol, 0.05 equiv) and potassium acetate (60mg, 0.6 mmol, 2.0 equiv) were placed in a transparent Schlenk tube equipped with a stirring bar. The tube kept in vacuum then flushed with argon. This procedure was repeated for 3-4 times. Toluene (dried with calcium hydride, distilled, and stored under N<sub>2</sub> atmosphere, 3.0 mL) and D<sub>2</sub>O (0.3 mL) was added under argon atmosphere. The reaction mixture was stirred at 80°C for 10 h (oil bath). The reaction mixture was cooled to room temperature, then extracted with ethyl acetate. The organic layers were combined and dried over Na<sub>2</sub>SO<sub>4</sub>, then concentrated under vacuo. The residue was purified by column chromatography on silica gel to afford the desired deuterated product (petroleum ether/ethyl acetate).



## 5.2 Characterization data for all products

### 1-Methyl-4-(1-phenylvinyl)benzene (3)

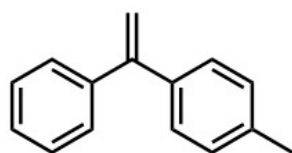

Following the general procedure A, the product **3** was obtained in 80% yield as a colorless oil after column chromatography (eluent = petroleum ether, 47 mg).  $^1\text{H}$  NMR (400 MHz,  $\text{CDCl}_3$ )  $\delta$  7.37 – 7.29 (m, 5H), 7.23 (d,  $J = 7.5$  Hz, 2H), 7.13 (d,  $J = 7.8$  Hz, 2H), 5.43 (s, 1H), 5.40 (s, 1H), 2.36 (s, 3H).  $^{13}\text{C}\{^1\text{H}\}$  NMR (101 MHz,  $\text{CDCl}_3$ )  $\delta$  150.0, 141.8, 138.7, 137.6, 129.0, 128.4, 128.3, 128.2, 127.7, 113.7, 21.3. All data were consistent with that presented in the literature<sup>[7]</sup>.

### 1-Methyl-2-(1-phenylvinyl)benzene (4)

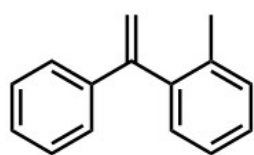

Following the general procedure A, the product **4** was obtained in 67% yield as a colorless oil after column chromatography (eluent = petroleum ether, 39 mg).  $^1\text{H}$  NMR (400 MHz,  $\text{CDCl}_3$ )  $\delta$  7.29 – 7.24 (m, 5H), 7.24 – 7.20 (m, 3H), 7.18 (d,  $J = 7.0$  Hz, 1H), 5.76 (s, 1H), 5.19 (s, 1H), 2.05 (s, 3H).  $^{13}\text{C}\{^1\text{H}\}$  NMR (101 MHz,  $\text{CDCl}_3$ )  $\delta$  149.6, 141.7, 140.7, 136.2, 130.2, 130.1, 128.4, 127.7, 127.6, 126.6, 125.8, 114.9, 20.2. All data were consistent with that presented in the literature<sup>[8]</sup>.

### 1-Methyl-3-(1-phenylvinyl)benzene (5)

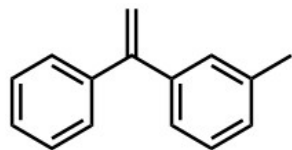

Following the general procedure A, the product **5** was obtained in 78% yield as a colorless oil after column chromatography (eluent = petroleum ether, 45 mg).  $^1\text{H}$  NMR (400 MHz,  $\text{CDCl}_3$ )  $\delta$  7.36 – 7.24 (m, 5H), 7.23 – 7.16 (m, 1H), 7.15 – 7.07 (m, 3H), 5.41 (s, 2H), 2.31 (s, 3H).  $^{13}\text{C}\{^1\text{H}\}$  NMR (101 MHz,  $\text{CDCl}_3$ )  $\delta$  150.2, 141.7, 141.5, 137.8, 129.0, 128.5, 128.3, 128.2, 128.1, 127.7, 125.5, 114.2, 21.5. All data were consistent with that presented in the literature<sup>[9]</sup>.

### 1-(Tert-butyl)-4-(1-phenylvinyl)benzene (6)

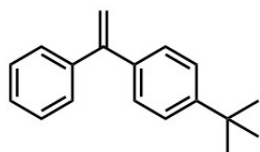

Following the general procedure A, the product **6** was obtained in 75% yield as a colorless oil after column chromatography (eluent = petroleum ether, 53 mg).  $^1\text{H}$  NMR (400 MHz,  $\text{CDCl}_3$ )  $\delta$  7.37 – 7.30 (m, 7H), 7.29 – 7.26 (m, 2H), 5.45 (s, 1H), 5.40 (s, 1H), 1.33 (s, 9H).  $^{13}\text{C}\{^1\text{H}\}$  NMR (101 MHz,  $\text{CDCl}_3$ )  $\delta$  150.8, 149.9, 141.8, 138.5, 128.5, 128.2, 128.0, 127.7, 125.2, 113.8, 34.7, 31.5. All data were consistent with that presented in the literature<sup>[8]</sup>.

### 1-Methoxy-3-(1-phenylvinyl)benzene (7)

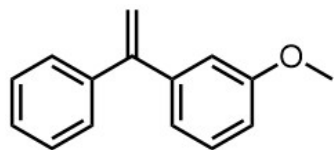

Following the general procedure A, the product **7** was obtained in 67% yield as a colorless oil after column chromatography (eluent = petroleum ether: ethyl acetate = 50:1, 42 mg).  $^1\text{H}$  NMR (400 MHz,  $\text{CDCl}_3$ )  $\delta$  7.30 – 7.19 (m, 5H), 7.18 – 7.12 (m, 1H), 6.92 – 6.66 (m, 3H), 5.36 (s, 2H), 3.68 (s, 3H).  $^{13}\text{C}\{^1\text{H}\}$  NMR (101 MHz,  $\text{CDCl}_3$ )  $\delta$  159.5, 150.0, 143.1, 141.4, 129.2, 128.3, 128.2, 127.8, 121.0, 114.5, 114.0, 113.3, 55.3. All data were consistent with that presented in the literature<sup>[10]</sup>.

### 1,2-Dimethoxy-4-(1-phenylvinyl)benzene (8)

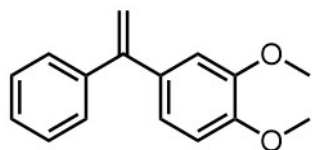

Following the general procedure A, the product **8** was obtained in 75% yield as a colorless oil after column chromatography (eluent = petroleum ether : ethyl acetate = 50:1, 54 mg).  $^1\text{H}$  NMR (400 MHz,  $\text{CDCl}_3$ )  $\delta$  7.41 – 7.31 (m, 5H), 6.92 – 6.90 (m, 2H), 6.85 – 6.83 (m, 1H), 5.43 (s, 1H), 5.40 (s, 1H), 3.90 (s, 3H), 3.84 (s, 3H).  $^{13}\text{C}\{^1\text{H}\}$  NMR (101 MHz,  $\text{CDCl}_3$ )  $\delta$  149.8, 148.9, 148.6, 141.6, 134.4, 128.3, 128.1, 127.7, 121.0, 113.2, 111.5, 110.8, 55.9, 55.9. All data were consistent with that presented in the literature<sup>[11]</sup>.

### 4-(1-Phenylvinyl)-1,1'-biphenyl (9)

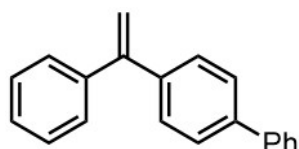

Following the general procedure A, the product **9** was obtained in 83% yield as a white solid after column chromatography (eluent = petroleum ether, 64 mg).  $^1\text{H}$  NMR (400 MHz,  $\text{CDCl}_3$ ) 7.58 – 7.48 (m, 4H), 7.41 – 7.25 (m, 10H), 5.46 (s, 1H), 5.41 (s, 1H);  $^{13}\text{C}\{^1\text{H}\}$  NMR (101 MHz,  $\text{CDCl}_3$ )  $\delta$  149.7, 141.6, 140.8, 140.6, 140.5, 128.9, 128.7, 128.4, 128.3, 127.9, 127.4, 127.1, 127.0, 114.4. All data were consistent with that presented in the literature<sup>[12]</sup>.

### 2-(1-Phenylvinyl)naphthalene (10)

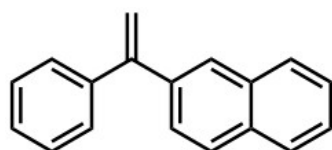

Following the general procedure A, the product **10** was obtained in 80% yield as a white solid after column chromatography (eluent = petroleum ether, 55 mg).  $^1\text{H}$  NMR (400 MHz,  $\text{CDCl}_3$ )  $\delta$  7.88 – 7.80 (m, 4H), 7.54 – 7.47 (m, 3H), 7.45 – 7.37 (m, 5H), 5.63 (s, 1H), 5.59 (s, 1H);  $^{13}\text{C}\{^1\text{H}\}$  NMR (101 MHz,  $\text{CDCl}_3$ )  $\delta$  150.1, 141.6, 139.0, 133.4, 133.0, 128.5, 128.3, 128.3, 127.9, 127.8, 127.7, 127.4, 126.5, 126.2, 126.1, 114.9. All data were consistent with that presented in the literature<sup>[13]</sup>.

### 1-(1-Phenylvinyl)-4-vinylbenzene (11)

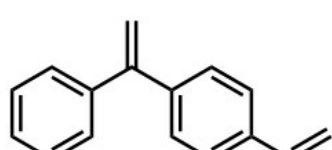

Following the general procedure A, the product **11** was obtained in 78% yield as a colorless oil after column chromatography (eluent = petroleum ether, 48 mg).  $^1\text{H}$  NMR (400 MHz,  $\text{CDCl}_3$ )  $\delta$  7.46 – 7.30 (m, 9H), 6.82 – 6.71 (m, 1H), 5.80 (d,  $J$  = 17.6 Hz, 1H), 5.51 (s, 1H), 5.48 (s, 1H), 5.29 (d,  $J$  = 10.9 Hz, 1H);  $^{13}\text{C}\{^1\text{H}\}$  NMR (101 MHz,  $\text{CDCl}_3$ )  $\delta$  149.8, 141.5, 141.0, 137.1, 136.5, 128.5, 128.4, 128.3, 127.8, 126.1, 114.3, 114.0. All data were consistent with that presented in the literature<sup>[14]</sup>.

### M(4-(1-phenylvinyl)phenyl)sulfane (12)

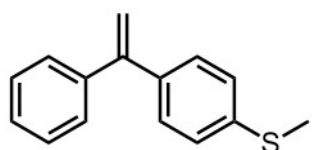

Following the general procedure A, the product **12** was obtained in 76% yield as a colorless oil after column chromatography (eluent = petroleum ether, 52 mg).  $^1\text{H}$  NMR (400 MHz,  $\text{CDCl}_3$ )  $\delta$  7.34 – 7.29 (m, 5H), 7.27 – 7.23 (m, 2H), 7.20 (d,  $J$  = 8.4 Hz, 2H), 5.43 (s, 1H), 5.40 (s, 1H), 2.48 (s, 3H);  $^{13}\text{C}\{^1\text{H}\}$  NMR (101 MHz,  $\text{CDCl}_3$ )  $\delta$  149.6, 141.5, 138.4, 138.1, 128.8, 128.4, 128.3, 127.9, 126.3, 114.0, 15.9. All data were consistent with that presented in the literature<sup>[15]</sup>.

### Methyl(2-(1-phenylvinyl)phenyl)sulfane (13)

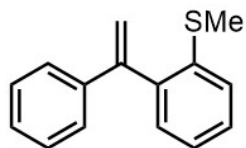

Following the general procedure A, the product **13** was obtained in 81% yield as a colorless oil after column chromatography (eluent = petroleum ether, 55 mg).  $^1\text{H NMR}$  (400 MHz,  $\text{CDCl}_3$ )  $\delta$  7.33 – 7.23 (m, 6H), 7.22 – 7.14 (m, 3H), 5.82 (s, 1H), 5.27 (s, 1H), 2.30 (s, 3H).  $^{13}\text{C}\{^1\text{H}\}$  NMR (101 MHz,  $\text{CDCl}_3$ )  $\delta$  148.1, 140.7, 139.9, 137.7, 130.3, 128.3, 128.2, 127.7, 126.6, 125.2, 124.6, 116.2, 15.9. All data were consistent with that presented in the literature<sup>[16]</sup>.

### T(4-(1-phenylvinyl)phenyl)silane (14)

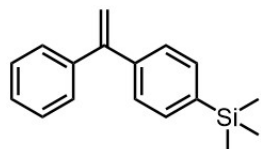

Following the general procedure A, the product **14** was obtained in 76% yield as a colorless oil after column chromatography (eluent = petroleum ether, 58 mg).  $^1\text{H NMR}$  (400 MHz,  $\text{CDCl}_3$ )  $\delta$  7.52 (d,  $J$  = 8.0 Hz, 2H), 7.41 – 7.32 (m, 7H), 5.50 (s, 1H), 5.49 (s, 1H), 0.31 (s, 9H);  $^{13}\text{C}\{^1\text{H}\}$  NMR (101 MHz,  $\text{CDCl}_3$ )  $\delta$  150.2, 141.9, 141.6, 140.0, 133.3, 128.4, 128.3, 127.8, 127.6, 114.5, -1.0. HRMS-ESI  $m/z$  Calculated for  $\text{C}_{17}\text{H}_{21}\text{Si}^+$  [(M+H<sup>+</sup>)] 253.1408, Found 253.1405.

### 1-(1-Phenylvinyl)-4-(trifluoromethoxy)benzene (15)

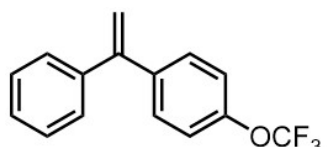

Following the general procedure A, the product **15** was obtained in 43% yield as a colorless oil after column chromatography (eluent = petroleum ether, 34 mg).  $^1\text{H NMR}$  (400 MHz,  $\text{CDCl}_3$ )  $\delta$  7.40 – 7.30 (m, 7H), 7.19 (d,  $J$  = 8.3 Hz, 2H), 5.50 (s, 1H), 5.46 (s, 1H);  $^{13}\text{C}\{^1\text{H}\}$  NMR (101 MHz,  $\text{CDCl}_3$ )  $\delta$  148.9, 141.1, 140.3, 129.7, 128.4, 128.3, 128.1, 120.7, 120.6 (q,  $J$  = 257.1 Hz), 115.1.  $^{19}\text{F NMR}$  (376 MHz,  $\text{CDCl}_3$ )  $\delta$  -57.7. HRMS-ESI  $m/z$  Calculated for  $\text{C}_{15}\text{H}_{12}\text{F}_3\text{O}^+$  [(M+H<sup>+</sup>)] 265.0835, Found 265.0830.

### 1-(1-Phenylvinyl)-4-(trifluoromethyl)benzene (16)

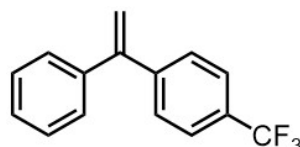

Following the general procedure A, the product **16** was obtained in 49% yield as a colorless oil after column chromatography (eluent = petroleum ether, 36 mg).  $^1\text{H NMR}$  (400 MHz,  $\text{CDCl}_3$ )  $\delta$  7.60 (d,  $J$  = 8.2 Hz, 2H), 7.46 (d,  $J$  = 8.1 Hz, 2H), 7.39 – 7.29 (m, 5H), 5.57 (s, 1H), 5.52 (s, 1H).  $^{13}\text{C}\{^1\text{H}\}$  NMR (101 MHz,  $\text{CDCl}_3$ )  $\delta$  149.1, 145.2, 140.7, 129.9 (q,  $J$  = 32.4 Hz), 128.7, 128.5, 128.3, 128.2, 125.3 (q,  $J$  = 3.8 Hz), 124.3 (q,  $J$  = 271.9 Hz), 116.0.  $^{19}\text{F NMR}$  (565 MHz,  $\text{CDCl}_3$ )  $\delta$  -62.4. All data were consistent with that presented in the literature<sup>[8]</sup>.

### 1-Fluoro-4-(1-phenylvinyl)benzene (17)

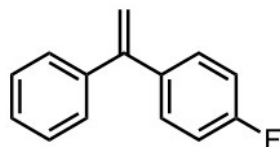

Following the general procedure A, the product **17** was obtained in 75% yield as a colorless oil after column chromatography (eluent = petroleum ether, 45 mg).  $^1\text{H NMR}$  (400 MHz,  $\text{CDCl}_3$ )  $\delta$  7.31 – 7.24 (m, 7H), 7.01 – 6.94 (m, 2H), 5.39 (s, 1H), 5.37 (s, 1H).  $^{13}\text{C}\{^1\text{H}\}$  NMR (101 MHz,  $\text{CDCl}_3$ ) 162.6 (d,  $J$  = 246.7 Hz), 149.2, 141.4, 137.7 (d,  $J$  = 3.3 Hz), 130.0 (d,  $J$  = 8.2 Hz), 128.3, 128.3, 128.0, 115.1 (d,  $J$  = 21.3 Hz), 114.3.  $^{19}\text{F NMR}$  (376 MHz,  $\text{CDCl}_3$ )  $\delta$  -114.6. All data were consistent with that presented in the literature<sup>[13]</sup>.

### 2,4-Difluoro-1-(1-phenylvinyl)benzene (18)

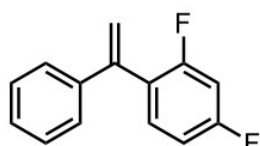

Following the general procedure A, the product **18** was obtained in 70% yield as a colorless oil after column chromatography (eluent = petroleum ether, 45 mg).  $^1\text{H}$  NMR (400 MHz,  $\text{CDCl}_3$ )  $\delta$  7.40 – 7.25 (m, 6H), 6.97 – 6.83 (m, 2H), 5.78 (s, 1H), 5.44 (s, 1H).  $^{13}\text{C}\{^1\text{H}\}$  NMR (101 MHz,  $\text{CDCl}_3$ )  $\delta$  163.9 (d,  $J = 11.7$  Hz), 161.9 – 160.8 (m), 159.1 (d,  $J = 11.9$  Hz), 143.5, 140.5, 132.52 – 131.82 (m), 128.4, 128.0, 126.9, 117.3, 111.38 – 110.91 (m), 104.8 – 103.4 (m).  $^{19}\text{F}$  NMR (565 MHz,  $\text{CDCl}_3$ )  $\delta$  -108.7, -110.8. All data were consistent with that presented in the literature<sup>[17]</sup>.

### 1-Chloro-2-(1-phenylvinyl)benzene (19)

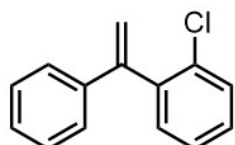

Following the general procedure A, the product **19** was obtained in 50% yield as a colorless oil after column chromatography (eluent = petroleum ether, 32 mg).  $^1\text{H}$  NMR (400 MHz,  $\text{CDCl}_3$ )  $\delta$  7.47 – 7.41 (m, 1H), 7.39 – 7.26 (m, 8H), 5.87 (s, 1H), 5.32 (s, 1H).  $^{13}\text{C}\{^1\text{H}\}$  NMR (101 MHz,  $\text{CDCl}_3$ )  $\delta$  147.5, 140.7, 139.8, 133.4, 131.6, 129.8, 128.9, 128.4, 127.8, 126.7, 126.5, 116.3. All data were consistent with that presented in the literature<sup>[18]</sup>.

### 1-Chloro-3-(1-phenylvinyl)benzene (20)

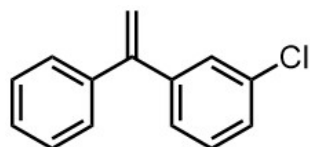

Following the general procedure A, the product **20** was obtained in 69% yield as a colorless oil after column chromatography (eluent = petroleum ether, 44 mg).  $^1\text{H}$  NMR (400 MHz,  $\text{CDCl}_3$ )  $\delta$  7.35 – 7.28 (m, 6H), 7.28 – 7.17 (m, 3H), 5.48 (s, 1H), 5.45 (s, 1H).  $^{13}\text{C}\{^1\text{H}\}$  NMR (101 MHz,  $\text{CDCl}_3$ )  $\delta$  149.0, 143.5, 140.9, 134.2, 129.5, 128.4, 128.3, 128.1, 127.9, 126.6, 115.4. All data were consistent with that presented in the literature<sup>[13]</sup>.

### 2,4-Dichloro-1-(1-phenylvinyl)benzene (21)

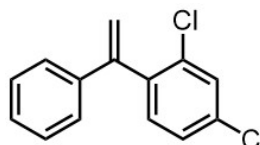

Following the general procedure A, the product **21** was obtained in 67% yield as a colorless oil after column chromatography (eluent = petroleum ether, 50 mg).  $^1\text{H}$  NMR (400 MHz,  $\text{CDCl}_3$ )  $\delta$  7.41 (d,  $J = 1.8$  Hz, 1H), 7.34 – 7.22 (m, 7H), 5.83 (s, 1H), 5.27 (s, 1H).  $^{13}\text{C}\{^1\text{H}\}$  NMR (101 MHz,  $\text{CDCl}_3$ )  $\delta$  146.6, 139.5, 139.3, 134.2, 134.1, 132.4, 129.7, 128.5, 128.0, 127.1, 126.5, 116.8. All data were consistent with that presented in the literature<sup>[19]</sup>.

### 1-Bromo-4-(1-phenylvinyl)benzene (22)

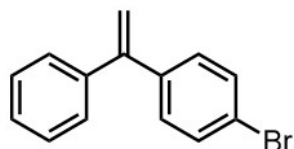

Following the general procedure A, the product **22** was obtained in 71% yield as a colorless oil after column chromatography (eluent = petroleum ether, 55 mg).  $^1\text{H}$  NMR (400 MHz,  $\text{CDCl}_3$ )  $\delta$  7.49 – 7.46 (m, 2H), 7.38 – 7.32 (m, 5H), 7.25 – 7.21 (m, 2H), 5.49 (s, 1H), 5.47 (s, 1H).  $^{13}\text{C}\{^1\text{H}\}$  NMR (101 MHz,  $\text{CDCl}_3$ )  $\delta$  149.1, 141.0, 140.5, 131.4, 130.0, 128.4, 128.3, 128.0, 121.9, 114.8. All data were consistent with that presented in the literature<sup>[13]</sup>.

### 1-Nitro-3-(1-phenylvinyl)benzene (23)

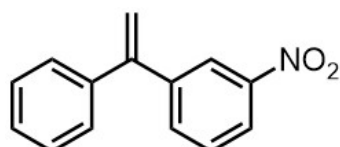

Following the general procedure A, the product **23** was

obtained in 63% yield as an yellow solid after column chromatography (eluent = petroleum ether: ethyl acetate = 20:1, 43 mg).  $^1\text{H}$  NMR (400 MHz,  $\text{CDCl}_3$ )  $\delta$  8.25 – 8.15 (m, 2H), 7.66 (d,  $J = 7.7$  Hz, 1H), 7.54 – 7.47 (m, 1H), 7.41 – 7.34 (m, 3H), 7.33 – 7.28 (m, 2H), 5.61 (s, 1H), 5.57 (s, 1H).  $^{13}\text{C}\{^1\text{H}\}$  NMR (101 MHz,  $\text{CDCl}_3$ )  $\delta$  148.5, 148.2, 143.4, 140.2, 134.3, 129.2, 128.6, 128.5, 128.2, 123.1, 122.7, 116.6. All data were consistent with that presented in the literature<sup>[20]</sup>.

#### Buta-1,3-diene-2,3-diylidibenzene (24)

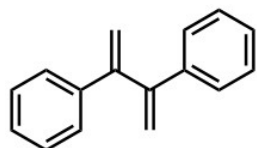

Following the general procedure A, the product **24** was obtained in 82% yield as a white solid after column chromatography (eluent = petroleum ether, 51 mg).  $^1\text{H}$  NMR (600 MHz,  $\text{CDCl}_3$ )  $\delta$  7.42 – 7.38 (m, 4H), 7.29 – 7.22 (m, 6H), 5.55 (d,  $J = 1.6$  Hz, 2H), 5.32 (d,  $J = 1.6$  Hz, 2H).  $^{13}\text{C}\{^1\text{H}\}$  NMR (151 MHz,  $\text{CDCl}_3$ )  $\delta$  149.8, 140.1, 128.2, 127.5, 127.5, 116.4. All data were consistent with that presented in the literature<sup>[21]</sup>.

#### 1-Methyl-3-(1-(4-(trifluoromethoxy)phenyl)vinyl)benzene (27)

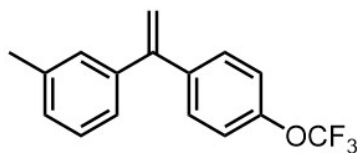

Following the general procedure A, the product **27** was obtained in 60% yield as a colorless oil after column chromatography (eluent = petroleum ether, 50 mg).  $^1\text{H}$  NMR (400 MHz,  $\text{CDCl}_3$ )  $\delta$  7.42 – 7.34 (m, 2H), 7.27 – 7.23 (m, 1H), 7.22 – 7.10 (m, 5H), 5.48 (s, 1H), 5.45 (s, 1H), 2.37 (s, 3H).  $^{13}\text{C}\{^1\text{H}\}$  NMR (101 MHz,  $\text{CDCl}_3$ )  $\delta$  149.0, 148.9, 141.1, 140.4, 138.0, 129.7, 129.0, 128.8, 128.3, 125.5, 120.7, 120.6 (q,  $J = 255.4$  Hz), 114.9, 21.5.  $^{19}\text{F}$  NMR (565 MHz,  $\text{CDCl}_3$ )  $\delta$  -57.7. HRMS-ESI  $m/z$  Calculated for  $\text{C}_{16}\text{H}_{14}\text{F}_3\text{O}^+$  [(M+H<sup>+</sup>)] 279.0991, Found 279.0986.

#### 2-(1-(M-tolyl)vinyl)naphthalene (28)

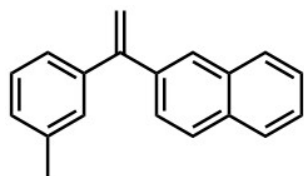

Following the general procedure A, the product **28** was obtained in 74% yield as a white solid after column chromatography (eluent = petroleum ether, 54 mg).  $^1\text{H}$  NMR (400 MHz,  $\text{CDCl}_3$ )  $\delta$  7.84 – 7.75 (m, 4H), 7.51 – 7.41 (m, 3H), 7.27 – 7.13 (m, 4H), 5.56 (s, 1H), 5.53 (s, 1H), 2.34 (s, 3H).  $^{13}\text{C}\{^1\text{H}\}$  NMR (101 MHz,  $\text{CDCl}_3$ )  $\delta$  150.2, 141.6, 139.1, 137.9, 133.4, 133.0, 129.2, 128.7, 128.3, 128.2, 127.7, 127.7, 127.3, 126.5, 126.2, 126.1, 125.6, 114.8, 21.5. HRMS-ESI  $m/z$  Calculated for  $\text{C}_{19}\text{H}_{17}^+$  [(M+H<sup>+</sup>)] 245.1325, Found 245.1324.

#### 1-Methoxy-4-(1-(p-tolyl)vinyl)benzene (29)

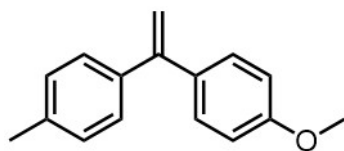

Following the general procedure A, the product **29** was obtained in 75% yield as a colorless oil after column chromatography (eluent = petroleum ether: ethyl acetate = 50:1, 50 mg).  $^1\text{H}$  NMR (400 MHz,  $\text{CDCl}_3$ )  $\delta$  7.28 – 7.25 (m, 2H), 7.24 – 7.21 (m, 2H), 7.13 (d,  $J = 7.9$  Hz, 2H), 6.87 – 6.83 (m, 2H), 5.33 (s, 1H), 5.32 (s, 1H), 3.80 (s, 3H), 2.35 (s, 3H).  $^{13}\text{C}\{^1\text{H}\}$  NMR (101 MHz,  $\text{CDCl}_3$ )  $\delta$  159.4, 149.5, 139.0, 137.5, 134.3, 129.5, 128.9, 128.3, 113.6, 112.4, 55.4, 21.3. All data were consistent with that presented in the literature<sup>[22]</sup>.

### Trimethyl(4-(1-(p-tolyl)vinyl)phenyl)silane (30)

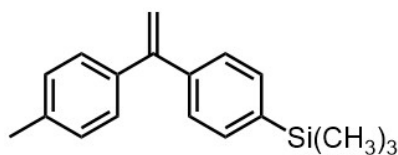

Following the general procedure A, the product **30** was obtained in 85% yield as a colorless oil after column chromatography (eluent = petroleum ether, 68 mg).  $^1\text{H}$  NMR (400 MHz,  $\text{CDCl}_3$ )  $\delta$  7.49 (d,  $J = 8.2$  Hz, 2H), 7.33 (d,  $J = 8.1$  Hz, 2H), 7.25 (d,  $J = 8.1$  Hz, 2H), 7.14 (d,  $J = 7.9$  Hz, 2H), 5.44 (s, 1H), 5.43 (s, 1H), 2.37 (s, 3H), 0.29 (s, 9H).  $^{13}\text{C}\{^1\text{H}\}$  NMR (101 MHz,  $\text{CDCl}_3$ )  $\delta$  150.0, 142.1, 139.9, 138.7, 137.6, 133.3, 129.0, 128.3, 127.7, 113.9, 21.3, -1.0. HRMS-ESI  $m/z$  Calculated for  $\text{C}_{18}\text{H}_{23}\text{Si}^+$  [(M+H<sup>+</sup>)] 267.1564, Found 267.1566.

### 1-Chloro-4-(1-(4-methoxyphenyl)vinyl)benzene (31)

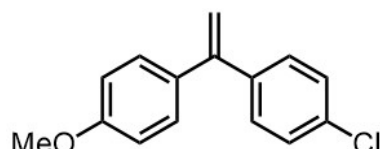

Following the general procedure A, the product **31** was obtained in 64% yield as a colorless oil after column chromatography (eluent = petroleum ether: ethyl acetate = 50:1, 47 mg).  $^1\text{H}$  NMR (400 MHz,  $\text{CDCl}_3$ )  $\delta$  7.32 – 7.23 (m, 6H), 6.90 – 6.84 (m, 2H), 5.40 (s, 1H), 5.34 (s, 1H), 3.83 (s, 3H).  $^{13}\text{C}\{^1\text{H}\}$  NMR (101 MHz,  $\text{CDCl}_3$ )  $\delta$  159.6, 148.5, 140.4, 133.6, 133.6, 129.7, 129.4, 128.4, 113.7, 113.4, 55.4. All data were consistent with that presented in the literature<sup>[23]</sup>.

### 3-(1-([1,1'-Biphenyl]-4-yl)vinyl)thiophene (32)

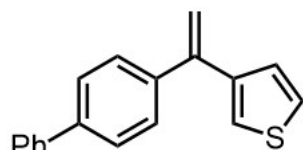

Following the general procedure A, the product **32** was obtained in 42% yield as a white solid after column chromatography (eluent = petroleum ether, 33 mg).  $^1\text{H}$  NMR (400 MHz,  $\text{CDCl}_3$ )  $\delta$  7.67 – 7.60 (m, 4H), 7.52 – 7.46 (m, 4H), 7.42 – 7.32 (m, 2H), 7.27 – 7.20 (m, 2H), 5.58 (s, 1H), 5.43 (s, 1H).  $^{13}\text{C}\{^1\text{H}\}$  NMR (101 MHz,  $\text{CDCl}_3$ )  $\delta$  144.3, 142.5, 140.8, 140.7, 140.5, 128.9, 128.6, 127.4, 127.4, 127.1, 127.0, 125.6, 123.4, 113.6. All data were consistent with that presented in the literature<sup>[24]</sup>.

### 4-(1-(2-Fluorophenyl)vinyl)-1,1'-biphenyl (33)

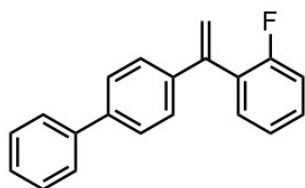

Following the general procedure A, the product **33** was obtained in 55% yield as a white solid after column chromatography (eluent = petroleum ether, 45 mg).  $^1\text{H}$  NMR (400 MHz,  $\text{CDCl}_3$ )  $\delta$  7.67 – 7.57 (m, 4H), 7.51 – 7.42 (m, 4H), 7.42 – 7.31 (m, 3H), 7.23 – 7.10 (m, 2H), 5.86 (s, 1H), 5.49 (s, 1H).  $^{13}\text{C}\{^1\text{H}\}$  NMR (101 MHz,  $\text{CDCl}_3$ )  $\delta$  160.2 (d,  $J = 248.4$  Hz), 143.8, 140.7 (d,  $J = 6.3$  Hz), 139.5, 131.6 (d,  $J = 3.6$  Hz), 129.5 (d,  $J = 8.1$  Hz), 129.3 (d,  $J = 14.3$  Hz), 128.9, 127.4, 127.3, 127.1, 127.0, 124.1 (d,  $J = 3.6$  Hz), 117.1, 116.0, 115.8.  $^{19}\text{F}$  NMR (565 MHz,  $\text{CDCl}_3$ )  $\delta$  -113.0. HRMS-ESI  $m/z$  Calculated for  $\text{C}_{20}\text{H}_{16}\text{F}^+$  [(M+H<sup>+</sup>)] 275.1231, Found 275.1235.

### 5-(1-([1,1'-Biphenyl]-4-yl)vinyl)benzo[d][1,3]dioxole (34)

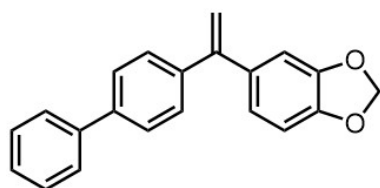

Following the general procedure A, the product **34** was obtained in 58% yield as a white solid after column chromatography (petroleum ether: ethyl acetate = 50:1, 52 mg).  $^1\text{H}$  NMR (400 MHz,  $\text{CDCl}_3$ )  $\delta$  7.65 – 7.58 (m, 4H), 7.48

– 7.42 (m, 4H), 7.40 – 7.35 (m, 1H), 6.90 – 6.87 (m, 2H), 6.83 – 6.80 (m, 1H), 6.00 – 5.98 (m, 2H), 5.44 (s, 1H), 5.42 (s, 1H).  $^{13}\text{C}\{^1\text{H}\}$  NMR (101 MHz,  $\text{CDCl}_3$ )  $\delta$  149.3, 147.6, 147.4, 140.8, 140.7, 140.6, 135.8, 128.9, 128.8, 127.4, 127.1, 127.0, 122.2, 113.5, 108.8, 108.1, 101.2. All data were consistent with that presented in the literature<sup>[25]</sup>.

#### 4,4'-(Ethene-1,1-diyl)bis(fluorobenzene) (35)

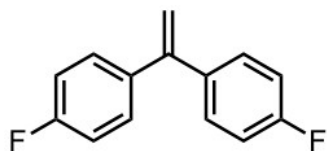

Following the general procedure A, the product **35** was obtained in 74% yield as a colorless oil after column chromatography (eluent = petroleum ether, 48 mg).  $^1\text{H}$  NMR (400 MHz,  $\text{CDCl}_3$ )  $\delta$  7.33 – 7.26 (m, 4H), 7.11 – 6.98 (m, 4H), 5.40 (s, 2H).  $^{13}\text{C}\{^1\text{H}\}$  NMR (101 MHz,  $\text{CDCl}_3$ )  $\delta$  162.7 (d,  $J = 247.1$  Hz), 148.2, 137.5 (d,  $J = 3.3$  Hz), 129.9 (d,  $J = 8.0$  Hz), 115.2 (d,  $J = 21.4$  Hz), 114.2.  $^{19}\text{F}$  NMR (565 MHz,  $\text{CDCl}_3$ )  $\delta$  -114.3. All data were consistent with that presented in the literature<sup>[13]</sup>.

#### 1-Fluoro-4-(1-(4-vinylphenyl)vinyl)benzene (36)

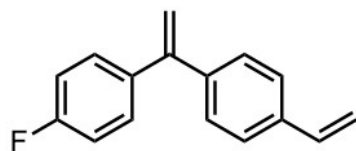

Following the general procedure A, the product **36** was obtained in 77% yield as a colorless oil after column chromatography (eluent = petroleum ether, 52 mg).  $^1\text{H}$  NMR (400 MHz,  $\text{CDCl}_3$ )  $\delta$  7.49 – 7.37 (m, 2H), 7.36 – 7.25 (m, 4H), 7.13 – 6.96 (m, 2H), 6.83 – 6.69 (m, 1H), 5.79 (d,  $J = 18.4$  Hz, 1H), 5.45 (d,  $J = 23.3$  Hz, 2H), 5.29 (d,  $J = 10.9$  Hz, 1H).  $^{13}\text{C}\{^1\text{H}\}$  NMR (101 MHz,  $\text{CDCl}_3$ )  $\delta$  162.6 (d,  $J = 246.7$  Hz), 148.8, 140.8, 137.6 (d,  $J = 3.3$  Hz), 137.3, 136.5, 130.0 (d,  $J = 7.9$  Hz), 128.4, 126.2, 115.1 (d,  $J = 21.4$  Hz), 114.2, 114.2.  $^{19}\text{F}$  NMR (565 MHz,  $\text{CDCl}_3$ )  $\delta$  -114.5. HRMS-ESI  $m/z$  Calculated for  $\text{C}_{16}\text{H}_{14}\text{F}^+$  [(M+H<sup>+</sup>)] 225.1075, Found 225.1072.

#### 1-Methyl-2-(1-(4-(trifluoromethyl)phenyl)vinyl)benzene (37)

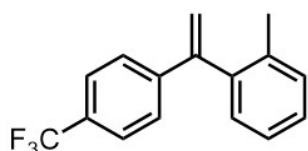

Following the general procedure A, the product **37** was obtained in 58% yield as a colorless oil after column chromatography (eluent = petroleum ether, 46 mg).  $^1\text{H}$  NMR (400 MHz,  $\text{CDCl}_3$ )  $\delta$  7.55 (d,  $J = 8.2$  Hz, 2H), 7.38 (d,  $J = 8.1$  Hz, 2H), 7.30 – 7.20 (m, 4H), 5.86 (s, 1H), 5.34 (s, 1H), 2.05 (s, 3H).  $^{13}\text{C}\{^1\text{H}\}$  NMR (101 MHz,  $\text{CDCl}_3$ )  $\delta$  148.5, 144.2, 140.8, 136.1, 130.4, 130.1, 129.8, 129.6 (q,  $J = 32.5$  Hz), 126.8, 126.0, 125.4 (q,  $J = 3.8$  Hz), 124.3 (q,  $J = 271.9$  Hz), 117.1, 20.2.  $^{19}\text{F}$  NMR (565 MHz,  $\text{CDCl}_3$ )  $\delta$  -62.4. HRMS-ESI  $m/z$  Calculated for  $\text{C}_{16}\text{H}_{14}\text{F}_3^+$  [(M+H<sup>+</sup>)] 263.1043, Found 263.1044.

#### 1-(4-(1-(4-Chlorophenyl)vinyl)phenyl)ethan-1-one (38)

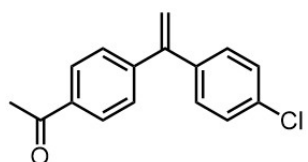

Following the general procedure A, the product **38** was obtained in 68% yield as a white solid after column chromatography (eluent = petroleum ether: ethyl acetate = 20:1, 52 mg).  $^1\text{H}$  NMR (400 MHz,  $\text{CDCl}_3$ )  $\delta$  7.94 – 7.91 (m, 2H), 7.42 – 7.38 (m, 2H), 7.33 – 7.29 (m, 2H), 7.26 – 7.22 (m, 2H), 5.55 (s, 1H), 5.54 (s, 1H), 2.61 (s, 3H).  $^{13}\text{C}\{^1\text{H}\}$  NMR (101 MHz,  $\text{CDCl}_3$ )  $\delta$  197.7, 148.2, 145.7, 139.2, 136.5, 134.0, 129.5, 128.6, 128.5, 128.4, 116.5, 26.7. HRMS-ESI  $m/z$  Calculated for  $\text{C}_{16}\text{H}_{14}\text{ClO}^+$  [(M+H<sup>+</sup>)] 257.0728, Found 257.0727.

#### Methyl 4-(1-(naphthalen-1-yl)vinyl)benzoate (**39**)

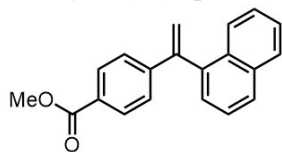

Following the general procedure A, the product **39** was obtained in 62% yield as a white solid after column chromatography (eluent = petroleum ether: ethyl acetate = 20:1, 53 mg).  $^1\text{H}$  NMR (400 MHz,  $\text{CDCl}_3$ )  $\delta$  7.93 (m, 4H), 7.70 (d,  $J = 8.5$  Hz, 1H), 7.58 – 7.30 (m, 6H), 6.09 (s, 1H), 5.54 (s, 1H), 3.91 (s, 3H).  $^{13}\text{C}\{^1\text{H}\}$  NMR (101 MHz,  $\text{CDCl}_3$ )  $\delta$  166.9, 147.6, 145.5, 139.1, 133.7, 131.7, 129.8, 129.2, 128.4, 128.4, 127.4, 126.6, 126.2, 126.1, 125.9, 125.5, 118.4, 52.2. HRMS-ESI  $m/z$  Calculated for  $\text{C}_{20}\text{H}_{17}\text{O}_2^+$  [( $\text{M}+\text{H}^+$ )] 289.1224, Found 289.1220.

#### 4-(1-(4-Nitrophenyl)vinyl)-1,1'-biphenyl (**40**)

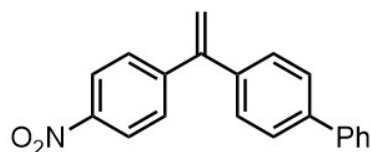

Following the general procedure A, the product **40** was obtained in 58% yield as a white solid after column chromatography (eluent = petroleum ether: ethyl acetate = 50:1, 52 mg).  $^1\text{H}$  NMR (400 MHz,  $\text{CDCl}_3$ )  $\delta$  8.27 – 8.18 (m, 2H), 7.65 – 7.59 (m, 4H), 7.57 – 7.52 (m, 2H), 7.50 – 7.43 (m, 2H), 7.41 – 7.34 (m, 3H), 5.70 (s, 1H), 5.61 (s, 1H).  $^{13}\text{C}\{^1\text{H}\}$  NMR (101 MHz,  $\text{CDCl}_3$ )  $\delta$  148.1, 148.1, 147.5, 141.3, 140.5, 139.1, 129.2, 129.0, 128.6, 127.7, 127.3, 127.1, 123.7, 117.2. All data were consistent with that presented in the literature<sup>[24]</sup>.

#### 4-(Oct-1-en-2-yl)-1,1'-biphenyl (**41**)

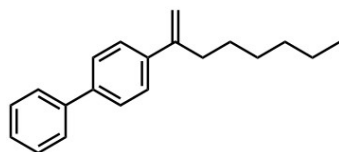

Following the general procedure A, the product **41** was obtained in 83% yield as a white solid after column chromatography (eluent = petroleum ether, 66 mg).  $^1\text{H}$  NMR (400 MHz,  $\text{CDCl}_3$ )  $\delta$  7.68 – 7.61 (m, 4H), 7.56 – 7.47 (m, 4H), 7.41 – 7.37 (m, 1H), 5.39 (s, 1H), 5.14 (s, 1H), 2.73 – 2.44 (m, 2H), 1.58 – 1.52 (m, 2H), 1.42 – 1.31 (m, 6H), 0.97 – 0.91 (m, 3H).  $^{13}\text{C}\{^1\text{H}\}$  NMR (101 MHz,  $\text{CDCl}_3$ )  $\delta$  148.3, 140.9, 140.4, 140.1, 128.8, 127.3, 127.0, 127.0, 126.5, 112.1, 35.4, 31.8, 29.1, 28.4, 22.7, 14.2. HRMS-ESI  $m/z$  Calculated for  $\text{C}_{20}\text{H}_{25}^+$  [( $\text{M}+\text{H}^+$ )] 265.1951, Found 265.1950.

#### 4-(1-Cyclopropylvinyl)-1,1'-biphenyl (**42**)

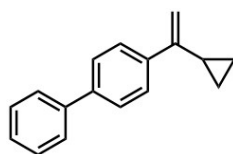

Following the general procedure A, the product **42** was obtained in 54% yield as a white solid after column chromatography (eluent = petroleum ether, 36 mg).  $^1\text{H}$  NMR (400 MHz,  $\text{CDCl}_3$ )  $\delta$  7.70 (d,  $J = 8.5$  Hz, 2H), 7.65 – 7.58 (m, 4H), 7.50 – 7.42 (m, 2H), 7.40 – 7.32 (m, 1H), 5.37 (s, 1H), 4.99 (s, 1H), 1.80 – 1.63 (m, 1H), 0.95 – 0.82 (m, 2H), 0.71 – 0.57 (m, 2H).  $^{13}\text{C}\{^1\text{H}\}$  NMR (101 MHz,  $\text{CDCl}_3$ )  $\delta$  148.9, 140.9, 140.6, 140.4, 128.9, 127.3, 127.1, 127.0, 126.6, 109.2, 15.7, 6.8. All data were consistent with that presented in the literature<sup>[26]</sup>.

#### 1-Methyl-4-(1-phenylvinyl-2,2- $d_2$ )benzene (**43**)

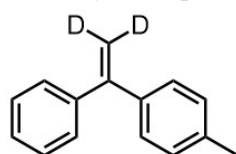

Following the general procedure B, the product **43** was obtained in 77% yield (91% D) as a colorless oil after column chromatography (eluent = petroleum ether, 45 mg).  $^1\text{H}$  NMR (400 MHz,  $\text{CDCl}_3$ )  $\delta$  7.34 – 7.23 (m, 5H), 7.19 (d,  $J = 7.8$  Hz, 2H), 7.09 (d,  $J = 7.9$  Hz, 2H), 5.37 (s, 0.09H),



5.34 (s, 0.03H), 2.32 (s, 3H).  $^{13}\text{C}\{^1\text{H}\}$  NMR (101 MHz,  $\text{CDCl}_3$ )  $\delta$  149.9, 141.8, 138.7, 137.6, 129.0, 128.4, 128.2, 128.2, 127.7, 21.3. HRMS-ESI  $m/z$  Calculated for  $\text{C}_{15}\text{H}_{13}\text{D}_2^+$  [(M+H<sup>+</sup>)] 197.1294, Found 197.1289.

#### 1-Chloro-4-(1-(4-fluorophenyl)vinyl-2,2-*d*<sub>2</sub>)benzene (44)

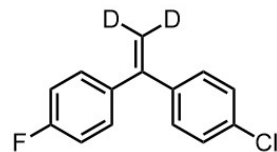

Following the general procedure B, the product **44** was obtained in 63% yield (94% D) as a colorless oil after column chromatography (eluent = petroleum ether, 44 mg).  $^1\text{H}$  NMR (600 MHz,  $\text{CDCl}_3$ )  $\delta$  7.51 – 7.38 (m, 2H), 7.33 – 7.27 (m, 4H), 7.05 – 7.00 (m, 2H), 5.41 (s, 0.10H), 5.30 (s, 0.02H).  $^{13}\text{C}\{^1\text{H}\}$  NMR (151 MHz,  $\text{CDCl}_3$ )  $\delta$  162.6 (d,  $J = 247.3$  Hz), 147.8, 133.7, 129.8 (d,  $J = 8.0$  Hz), 129.5, 129.0, 128.4, 128.2, 115.2 (d,  $J = 21.4$  Hz).  $^{19}\text{F}$  NMR (564 MHz,  $\text{CDCl}_3$ )  $\delta$  -114.3. HRMS-ESI  $m/z$  Calculated for  $\text{C}_{14}\text{H}_9\text{D}_2\text{ClF}^+$  [(M+H<sup>+</sup>)] 235.0654, Found 235.0650.

#### 1-(1-(4-Fluorophenyl)vinyl-2,2-*d*<sub>2</sub>)naphthalene (45)

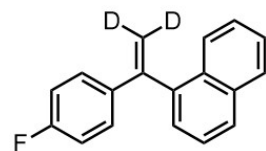

Following the general procedure B, the product **45** was obtained in 64% yield (83% D) as a white solid after column chromatography (eluent = petroleum ether, 48 mg).  $^1\text{H}$  NMR (600 MHz,  $\text{CDCl}_3$ )  $\delta$  7.91 – 7.84 (m, 2H), 7.74 (d,  $J = 8.5$  Hz, 1H), 7.53 – 7.50 (m, 1H), 7.47 – 7.42 (m, 2H), 7.37 – 7.33 (m, 1H), 7.32 – 7.26 (m, 2H), 7.01 – 6.90 (m, 2H), 5.91 (s, 0.08H), 5.37 (s, 0.17H).  $^{13}\text{C}\{^1\text{H}\}$  NMR (151 MHz,  $\text{CDCl}_3$ )  $\delta$  162.4 (d,  $J = 247.1$  Hz), 147.1, 139.5, 137.2 (d,  $J = 3.7$  Hz), 133.7, 131.7, 128.3, 128.2, 128.1, 127.2, 126.3, 125.9, 125.7, 125.4, 115.2 (d,  $J = 21.5$  Hz).  $^{19}\text{F}$  NMR (564 MHz,  $\text{CDCl}_3$ )  $\delta$  -114.7. HRMS-ESI  $m/z$  Calculated for  $\text{C}_{18}\text{H}_{12}\text{D}_2\text{F}^+$  [(M+H<sup>+</sup>)] 251.1200, Found 251.1196.

#### 1-Methyl-4-(1-(4-(trifluoromethyl)phenyl)vinyl-2,2-*d*<sub>2</sub>)benzene (46)

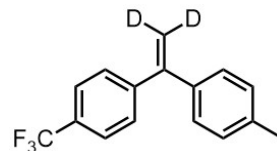

Following the general procedure B, the product **46** was obtained in 68% yield (93% D) as a colorless oil after column chromatography (eluent = petroleum ether, 54 mg).  $^1\text{H}$  NMR (600 MHz,  $\text{CDCl}_3$ )  $\delta$  7.59 (d,  $J = 8.1$  Hz, 2H), 7.46 (d,  $J = 8.1$  Hz, 2H), 7.24 – 7.13 (m, 4H), 5.53 (s, 0.07H), 5.45 (s, 0.03H), 2.39 (s, 3H).  $^{13}\text{C}\{^1\text{H}\}$  NMR (151 MHz,  $\text{CDCl}_3$ )  $\delta$  148.7, 145.3, 138.0, 137.7, 129.7 (q,  $J = 32.4$  Hz), 129.1, 128.6, 128.0, 125.1 (q,  $J = 3.8$  Hz), 124.2 (q,  $J = 271.8$  Hz), 21.2.  $^{19}\text{F}$  NMR (564 MHz,  $\text{CDCl}_3$ )  $\delta$  -62.5. HRMS-ESI  $m/z$  Calculated for  $\text{C}_{16}\text{H}_{12}\text{D}_2\text{F}_3^+$  [(M+H<sup>+</sup>)] 265.1168, Found 265.1167.

#### 1-(Tert-butyl)-4-(1-(4-(trifluoromethyl)phenyl)vinyl-2,2-*d*<sub>2</sub>)benzene (47)

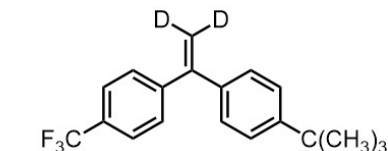

Following the general procedure B, the product **47** was obtained in 60% yield (91% D) as a colorless oil after column chromatography (eluent = petroleum ether, 55 mg).  $^1\text{H}$  NMR (400 MHz,  $\text{CDCl}_3$ )  $\delta$  7.49 (d,  $J = 8.2$  Hz, 2H), 7.37 (d,  $J = 8.1$  Hz, 2H), 7.30 – 7.24 (m, 2H), 7.18 – 7.12 (m, 2H), 5.44 (s, 0.09H), 5.35 (s, 0.03H), 1.25 (s, 9H).  $^{13}\text{C}\{^1\text{H}\}$  NMR (101 MHz,  $\text{CDCl}_3$ )  $\delta$  151.3, 148.7, 145.4, 137.7, 129.8 (q,  $J = 32.3$  Hz), 128.7, 127.9, 125.4, 125.2 (q,  $J = 3.8$  Hz), 124.4 (q,  $J = 272.7$  Hz), 34.7, 31.4.  $^{19}\text{F}$  NMR (376 MHz,  $\text{CDCl}_3$ )  $\delta$  -62.3. HRMS-ESI  $m/z$  Calculated for  $\text{C}_{19}\text{H}_{18}\text{D}_2\text{F}_3^+$  [(M+H<sup>+</sup>)] 307.1638, Found 307.1630.

#### 1-(4-(1-(3-Methoxyphenyl)vinyl-2,2-*d*<sub>2</sub>)phenyl)ethan-1-one (48)

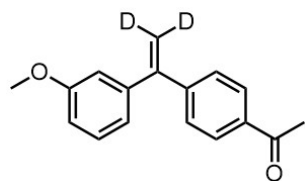

Following the general procedure B, the product **48** was obtained in 58% yield (86% D) as a white solid after column chromatography (eluent = petroleum ether: ethyl acetate = 15:1, 44 mg). <sup>1</sup>H NMR (600 MHz, CDCl<sub>3</sub>) δ 7.94 – 7.91 (m, 2H), 7.46 – 7.40 (m, 2H), 7.28 – 7.25 (m, 1H), 6.91 – 6.87 (m, 2H), 6.86 – 6.82 (m, 1H), 5.55 (s, 0.14H), 5.53 (s, 0.04H), 3.79 (s, 3H), 2.61 (s, 3H). <sup>13</sup>C{<sup>1</sup>H} NMR (151 MHz, CDCl<sub>3</sub>) δ 197.7, 159.5, 148.9, 146.0, 142.1, 136.3, 129.3, 128.4, 128.3, 120.7, 113.9, 113.4, 55.2, 26.6. HRMS-ESI *m/z* Calculated for C<sub>17</sub>H<sub>15</sub>D<sub>2</sub>O<sub>2</sub><sup>+</sup> [(M+H<sup>+</sup>)] 255.1349, Found 255.1344.

#### 1-Methoxy-3-(oct-1-en-2-yl-1,1-*d*<sub>2</sub>)benzene (49)

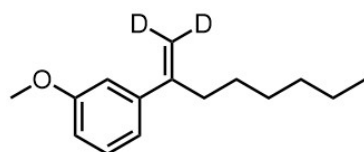

Following the general procedure B, the product **49** was obtained in 62% yield (85% D) as a colorless oil after column chromatography (eluent = petroleum ether, 41 mg). <sup>1</sup>H NMR (600 MHz, CDCl<sub>3</sub>) δ 7.28 – 7.22 (m, 1H), 7.04 – 6.99 (m, 1H), 6.98 – 6.93 (m, 1H), 6.86 – 6.79 (m, 1H), 5.26 (s, 0.15H), 5.04 (s, 0.07H), 3.83 (s, 3H), 2.50 – 2.46 (m, 2H), 1.48 – 1.43 (m, 2H), 1.35 – 1.26 (m, 6H), 0.91 – 0.85 (m, 3H). <sup>13</sup>C{<sup>1</sup>H} NMR (151 MHz, CDCl<sub>3</sub>) δ 159.5, 148.5, 143.1, 129.1, 118.7, 112.4, 112.1, 55.2, 35.3, 31.7, 29.0, 28.2, 22.6, 14.1. HRMS-ESI *m/z* Calculated for C<sub>15</sub>H<sub>21</sub>D<sub>2</sub>O<sup>+</sup> [(M+H<sup>+</sup>)] 221.1869, Found 221.1875.

#### 2,4-Dichloro-1-(oct-1-en-2-yl-1,1-*d*<sub>2</sub>)benzene (50)

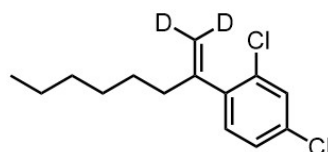

Following the general procedure B, the product **50** was obtained in 71% yield (85% D) as a colorless oil after column chromatography (eluent = petroleum ether, 55 mg). <sup>1</sup>H NMR (600 MHz, CDCl<sub>3</sub>) δ 7.40 – 7.35 (m, 1H), 7.21 – 7.18 (m, 1H), 7.09 (d, *J* = 8.2 Hz, 1H), 5.22 (s, 0.09H), 4.95 (s, 0.15H), 2.42 – 2.39 (m, 2H), 1.35 – 1.25 (m, 8H), 0.89 – 0.86 (m, 3H). <sup>13</sup>C{<sup>1</sup>H} NMR (151 MHz, CDCl<sub>3</sub>) δ 147.6, 140.6, 133.1, 132.9, 131.1, 129.3, 126.7, 36.5, 31.7, 28.9, 27.7, 22.6, 14.1. HRMS-ESI *m/z* Calculated for C<sub>14</sub>H<sub>17</sub>D<sub>2</sub>Cl<sub>2</sub><sup>+</sup> [(M+H<sup>+</sup>)] 259.0984, Found 259.0980.

#### (4-(1-Cyclopropylvinyl-2,2-*d*<sub>2</sub>)phenyl)trimethylsilane (51)

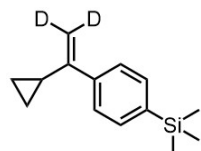

Following the general procedure B, the product **51** was obtained in 63% yield (90% D) as a colorless oil after column chromatography (eluent = petroleum ether, 41 mg). <sup>1</sup>H NMR (600 MHz, CDCl<sub>3</sub>) δ 7.61 (d, *J* = 8.0 Hz, 2H), 7.52 (d, *J* = 8.0 Hz, 2H), 5.30 (s, 0.22H), 5.30 (s, 0.09H), 1.69 – 1.63 (m, 1H), 0.86 – 0.82 (m, 2H), 0.63 – 0.57 (m, 2H), 0.28 (s, 9H). <sup>13</sup>C{<sup>1</sup>H} NMR (151 MHz, CDCl<sub>3</sub>) δ 149.1, 142.0, 139.5, 133.2, 125.4, 15.4, 6.6, -1.1. HRMS-ESI *m/z* Calculated for C<sub>14</sub>H<sub>19</sub>D<sub>2</sub>Si<sup>+</sup> [(M+H<sup>+</sup>)] 219.1533, Found 219.1529.

#### 4-(Ethynyl-*d*)-1,1'-biphenyl (53)

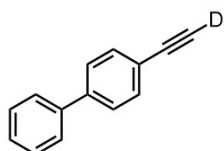

To a 15 mL-schlenk tube charged with a stirring bar, was added 3-([1,1'-biphenyl]-4-yl) propiolic acid (67 mg, 0.3 mmol, 1.0 equiv), Pd(OAc)<sub>2</sub> (1.35mg, 0.006 mmol, 0.02 equiv), PPh<sub>3</sub> (4mg, 0.015 mmol,

0.05 equiv), and KOAc (60 mg, 0.6 mmol, 2.0 equiv). The tube kept in vacuum then flushed with argon. This procedure was repeated for 3-4 times. Then the solvent (toluene = 3 mL, D<sub>2</sub>O = 0.3 mL) was added under argon atmosphere. The reaction mixture was stirred at 80°C for 0.5 h (oil bath). The reaction mixture was cooled to room temperature, then extracted with ethyl acetate. The organic layers were combined and dried over Na<sub>2</sub>SO<sub>4</sub>, then concentrated under vacuo. The residue was purified by flash column chromatography on silica gel (petroleum ether) to afford the product **53** (30 mg, 56% yield, 90% D) as a white solid. <sup>1</sup>H NMR (600 MHz, CDCl<sub>3</sub>) δ 7.61 – 7.57 (m, 6H), 7.49 – 7.45 (m, 2H), 7.41 – 7.35 (m, 1H), 3.15 (s, 0.10H). <sup>13</sup>C{<sup>1</sup>H} NMR (151 MHz, CDCl<sub>3</sub>) δ 141.6, 140.2, 132.6, 128.9, 127.8, 127.1, 127.0, 121.0, 83.1 (t, *J* = 7.7 Hz), 77.8. All data were consistent with that presented in the literature<sup>[27]</sup>.

### 3,3-Diphenylacrylic acid (**55**)

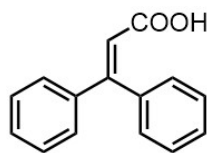

To an oven-dried Teflon capped vial equipped with a magnetic stirring bar were added sequentially AgOAc (2.59 g, 15.5 mmol) and Pd(OAc)<sub>2</sub> (11.2 mg, 0.05 mmol). The vial kept in vacuum then flushed with argon. This procedure was repeated for 3-4 times. Then AcOH (15 mL), iodobenzene (1.73 mL, 15.5 mmol) and ethyl acrylate (0.54 mL, 5.00 mmol) was added under Ar atmosphere, and the mixture was stirred under an atmosphere of argon at 110 °C for 6 hours. The mixture was cooled to room temperature, diluted with EtOAc (20 mL) and filtered through a pad of Celite. Then the filtrate was concentrated in vacuo, and the crude product ethyl 3,3-diphenylacrylate was purified by flash chromatography on silica column (petroleum ether: ethyl acetate = 15:1, 1.07 g, 85% yield).

To a solution of ethyl 3,3-diphenylacrylate (4.25 mmol) in 25 mL of ethanol was added slowly with stirring an aqueous sodium hydroxide solution (25 mL, 1 N). After 6h, the reaction mixture was diluted with water (50 mL) and was washed with dichloromethane (2 x 25 mL). The aqueous phase was acidified with 20% HCl solution and was extracted with dichloromethane (3 x 50 mL). The combined extracts were dried over MgSO<sub>4</sub> and purified by recrystallization to give 3,3-diphenylacrylic acid (477 mg, 50% yield). <sup>1</sup>H NMR (400 MHz, DMSO-*d*<sub>6</sub>) δ 12.21 (s, 1H), 7.41 – 7.33 (m, 6H), 7.30 – 7.22 (m, 2H), 7.18 – 7.12 (m, 2H), 6.37 (s, 1H). <sup>13</sup>C{<sup>1</sup>H} NMR (101 MHz, DMSO-*d*<sub>6</sub>) δ 166.8, 153.7, 140.6, 138.8, 129.2, 129.0, 128.5, 127.9, 118.9. All data were consistent with that presented in the literature<sup>[28]</sup>.

### (Ethynyl-*d*)benzene (**57**)

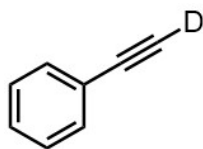

To a 15 mL-schlenk tube charged with a stirring bar, was added phenylpropionic acid (0.3 mmol, 1.0 equiv, 67 mg), Pd(OAc)<sub>2</sub> (1.35mg, 0.006 mmol, 0.02 equiv), PPh<sub>3</sub> (4mg, 0.015 mmol, 0.05 equiv), and KOAc (60 mg, 0.6 mmol, 2.0 equiv). The tube kept in vacuum then flushed with argon. This procedure was repeated for 3-4 times. Then the solvent (toluene = 3 mL, D<sub>2</sub>O = 0.3 mL) was added under argon atmosphere. The reaction mixture was stirred at 80°C for 1 h (oil bath). The reaction mixture was cooled to room temperature, then extracted with ethyl acetate. The organic layers were combined and dried over Na<sub>2</sub>SO<sub>4</sub>, then concentrated under vacuo. The residue was purified by flash column chromatography on silica gel (petroleum ether) to afford the product **57** (13 mg, 42% yield, 94% D) as a colorless oil. <sup>1</sup>H NMR (600 MHz, CDCl<sub>3</sub>) δ 7.53 – 7.49 (m, 2H), 7.37 – 7.31 (m, 3H), 3.09 (s, 0.06H). <sup>13</sup>C NMR (151 MHz, CDCl<sub>3</sub>) δ 132.1, 128.8,

128.3, 122.1, 83.2 (t,  $J = 7.6$  Hz), 76.9 (t,  $J = 38.6$  Hz). All data were consistent with that presented in the literature<sup>[29]</sup>.

**(E)-1-methyl-4-(1-phenylvinyl-2-*d*)benzene (58)**

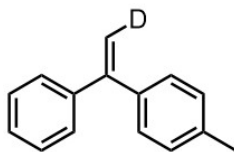

To a 15 mL-schlenk tube charged with a stirring bar, was added Pd(OAc)<sub>2</sub> (1.35 mg, 0.006 mmol, 0.02 equiv), PPh<sub>3</sub> (4 mg, 0.015 mmol, 0.05 equiv), and KOAc (60 mg, 0.6 mmol, 2.0 equiv). The tube kept in vacuum then flushed with argon. This procedure was repeated for 3-4 times. Then the solvent (toluene = 3 mL, D<sub>2</sub>O = 0.3 mL) and phenylacetylene (31mg, 0.3 mmol) was added under argon atmosphere. The reaction mixture was stirred at 80°C for 10 h (oil bath). The reaction mixture was cooled to room temperature, then extracted with ethyl acetate. The organic layers were combined and dried over Na<sub>2</sub>SO<sub>4</sub>, then concentrated under vacuo. The residue was purified by flash column chromatography on silica gel (petroleum ether) to afford the product **58** (40 mg, 68% yield) as a colorless oil. <sup>1</sup>H NMR (600 MHz, CDCl<sub>3</sub>) δ 7.41 – 7.32 (m, 5H), 7.28 – 7.26 (m, 2H), 7.19 – 7.15 (m, 2H), 5.42 (s, 1H), 2.40 (s, 3H). <sup>13</sup>C NMR (151 MHz, CDCl<sub>3</sub>) δ 149.8, 141.7, 138.6, 137.5, 128.9, 128.3, 128.2, 128.1, 127.7, 113.4 (t,  $J = 24.1$  Hz), 21.2. HRMS-ESI  $m/z$  Calculated for C<sub>15</sub>H<sub>14</sub>D<sub>2</sub><sup>+</sup> [(M+H<sup>+</sup>)] 196.1232, Found 196.1230.

## 6. References

- [1] J. Hwang, J. Choi, K. Park, W. Kim, K. H. Song and S. Lee, *Eur. J. Org. Chem.*, 2015, **10**, 2235–2243.
- [2] M. Zhou, M. Chen, Y. Zhou, K. Yang, J. Su, J. Du and Q. Song, *Org. Lett.*, 2015, **17**, 1786–1789.
- [3] E. D. Slack, C. M. Gabriel and B. H. Lipshutz, *Angew. Chem. Int. Ed.*, 2014, **53**, 14051–14054.
- [4] S. N. Karad and W. K. Chung, *Chem. Commun.*, 2015, **51**, 13004–13007.
- [5] M. G. Lloyd and R. J. K. Taylor, *Org. Biomol. Chem.*, 2016, **14**, 8971–8988.
- [6] Q. Yan and D. Kong, *J. Org. Chem.*, 2016, **81**, 2070–2077.
- [7] U. T. Duong, A. B. Gade, S. Plummer, F. Gallou and S. Handa, *ACS Catal.*, 2019, **9**, 10963–10970.
- [8] C. H. Lei, Y. J. Yip and J. S. Zhou, *J. Am. Chem. Soc.*, 2017, **139**, 6086–6089.
- [9] M. L. Czyz, M. S. Taylor, T. H. Horngren and A. Polyzos, *ACS Catal.*, 2021, **11**, 5472–5480.
- [10] J. C. L. Walker and M. Oestreich, *Org. Lett.*, 2018, **20**, 6411–6414.
- [11] A. Music, A. N. Baumann, P. Spieß, N. Hilgert, M. Köllen and D. Didier, *Org. Lett.*, 2019, **21**, 2189–2193.
- [12] N. Noto, T. Koike and M. Akita, *ACS Catal.*, 2019, **9**, 4382–4387.
- [13] C. Wan, R. J. Song and J. H. Li, *Org. Lett.*, 2019, **21**, 2800–2803.
- [14] G. Z. Wang, X. L. Li, J. J. Dai and H. J. Xu, *J. Org. Chem.*, 2014, **79**, 7220–7225.
- [15] M. L. Zhang, J. Xie and C. J. Zhu, *Nat Commun.*, 2018, **9**, 3517.
- [16] K. Kobayashi and T. Ueyama, *Heterocycles.*, 2018, **96**, 1570–1582.
- [17] F. G. Portolés, R. Greco and J. O. Meseguer, *Nat Catal.*, 2021, **4**, 293–303.
- [18] S. S. Zhang, Z. M. Shen and H. Jian, *J. Org. Chem.*, 2020, **85**, 6143–6150.
- [19] J. H. Chen, C. H. Chen, C. L. Ji and Z. Lu, *Org. Lett.*, 2016, **18**, 1594–1597.
- [20] D. Ganapathy and G. Sekar, *Org. Lett.*, 2014, **16**, 3856–3859.
- [21] D. Eom, S. Park, Y. Park, T. Ryu and P. H. Lee, *Org. Lett.*, 2012, **14**, 5392–5395.
- [22] L. Li and G. Hilt, *Org. Lett.*, 2020, **22**, 1628–1632.
- [23] G. J. Wu, X. Zhao, W. Z. Ji, Y. Zhang and J. Wang, *Chem. Commun.*, 2016, **52**, 1961–1963.
- [24] Y. Liu, P. Liu, Y. Liu and Y. Wei, *Chin. J. Chem.*, 2017, **35**, 1141–1148.
- [25] M. Y. Chang, Y. H. Huang and H. S. Wang, *Tetrahedron.*, 2016, **72**, 3022–3031.
- [26] P. W. Long, T. He and M. Oestreich, *Org. Lett.*, 2020, **22**, 7383–7386.
- [27] C. Liu, S. Han, M. Li, X. Chong and B. Zhang, *Angew. Chem. Int. Ed.*, 2020, **59**, 18527–18531.
- [28] C. Song, P. Chen and Y. Tang, *RSC Adv.*, 2017, **7**, 11233–11243.
- [29] B. Chatterjee and C. Gunanathan, *Chem. Commun.*, 2016, **52**, 4509–4512.

## 7. Copies of NMR spectra

### 1-Methyl-4-(1-phenylvinyl)benzene (3)

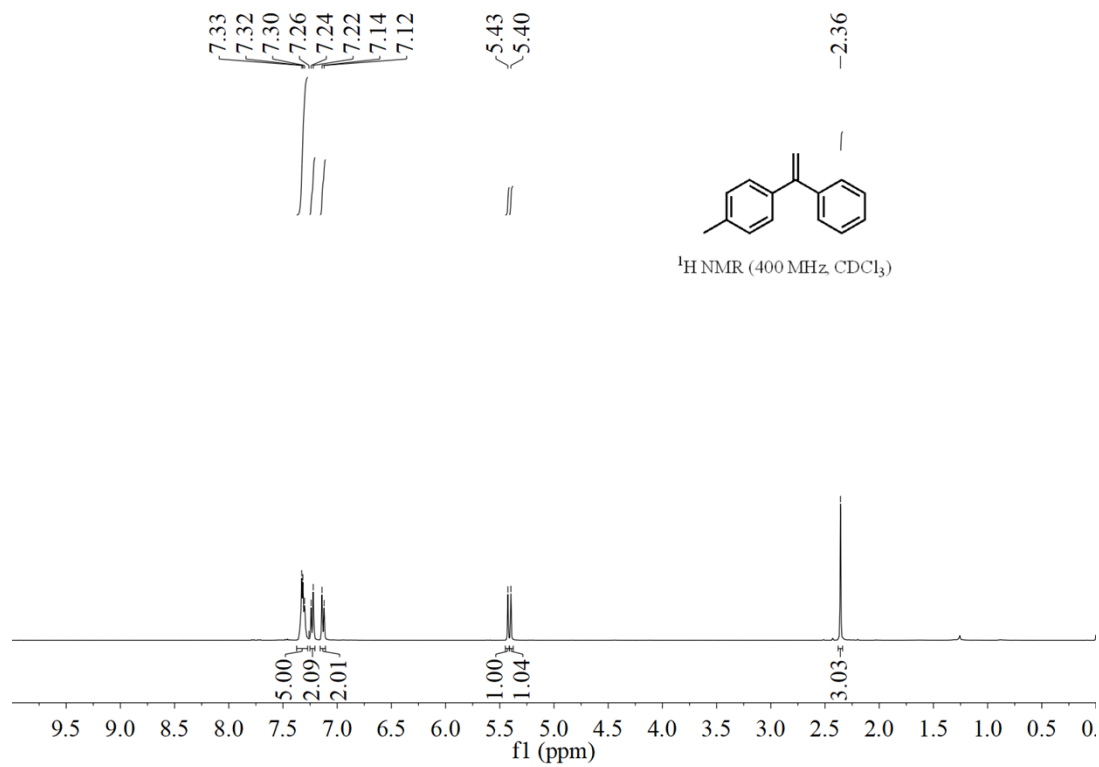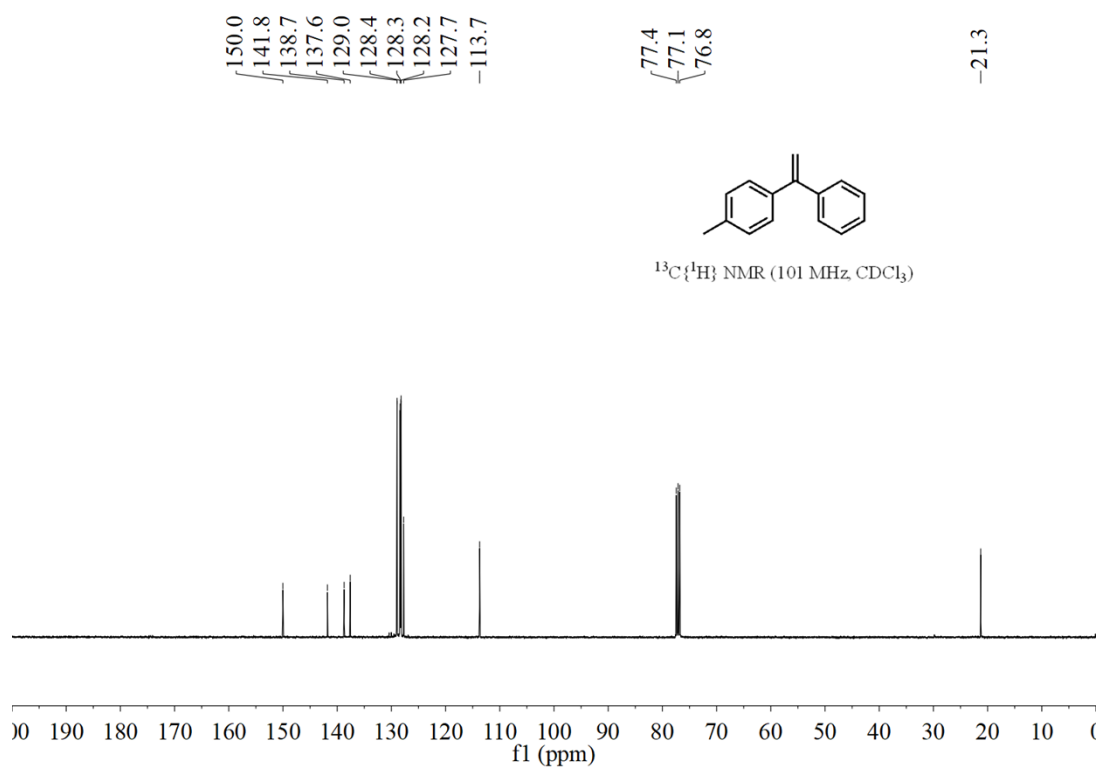

**1-Methyl-2-(1-phenylvinyl)benzene (4)**

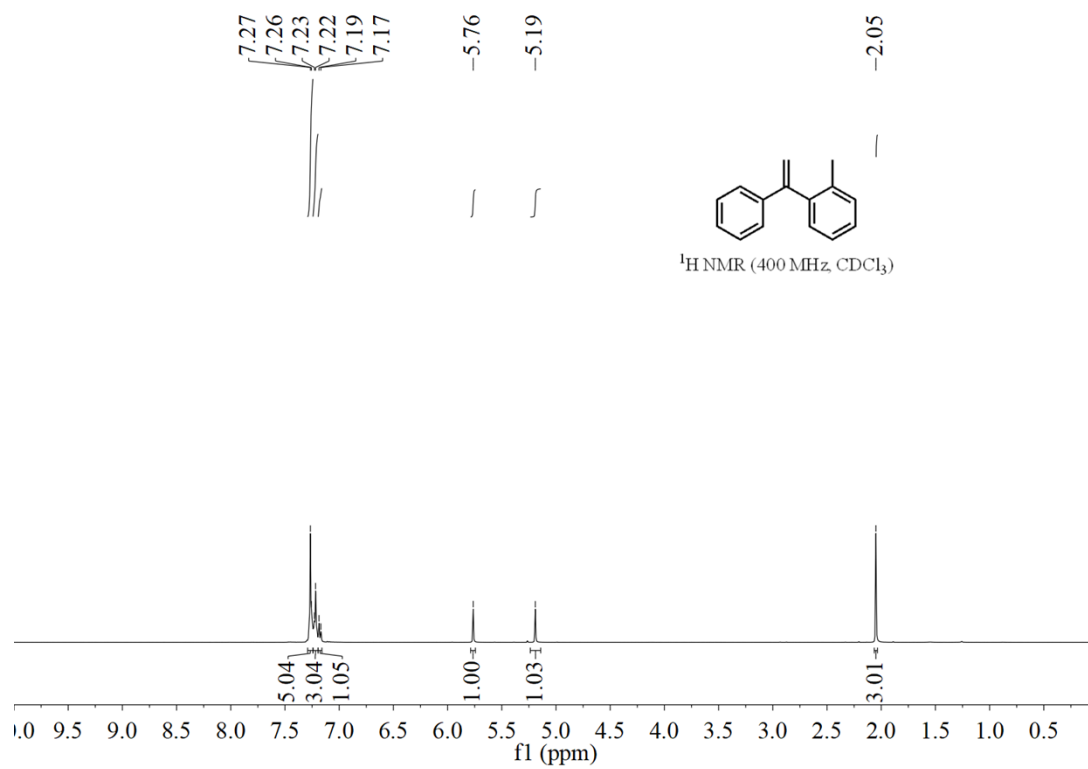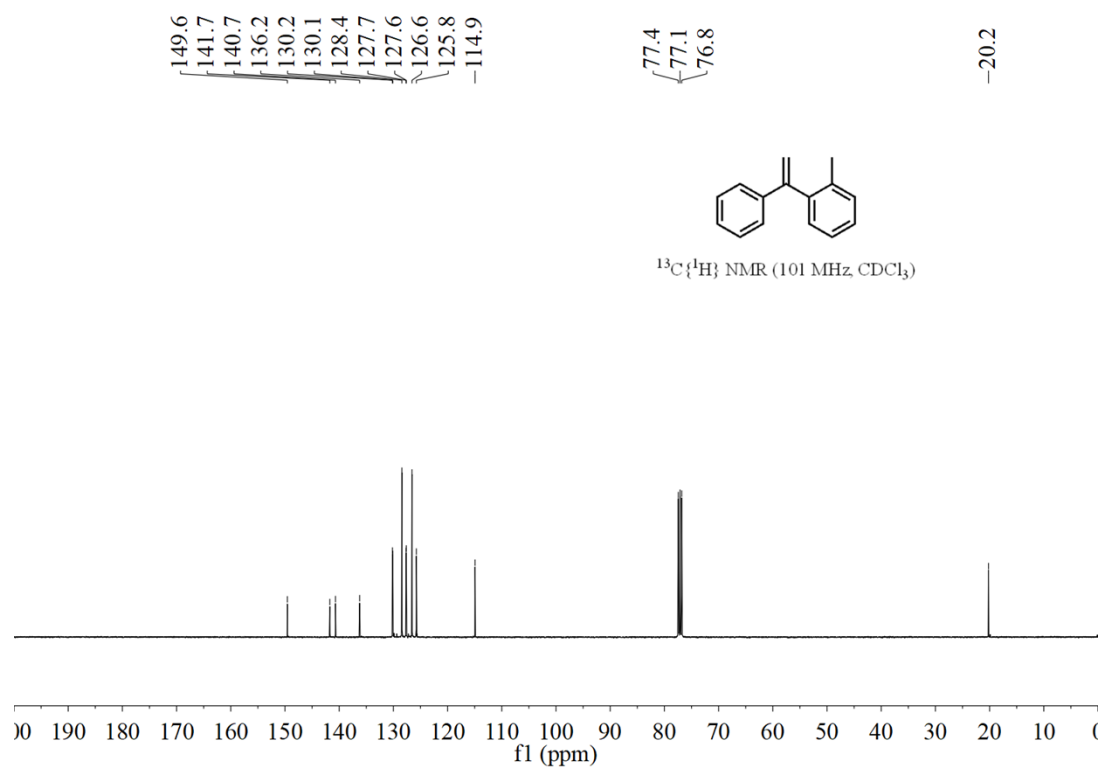

**1-Methyl-3-(1-phenylvinyl)benzene (5)**

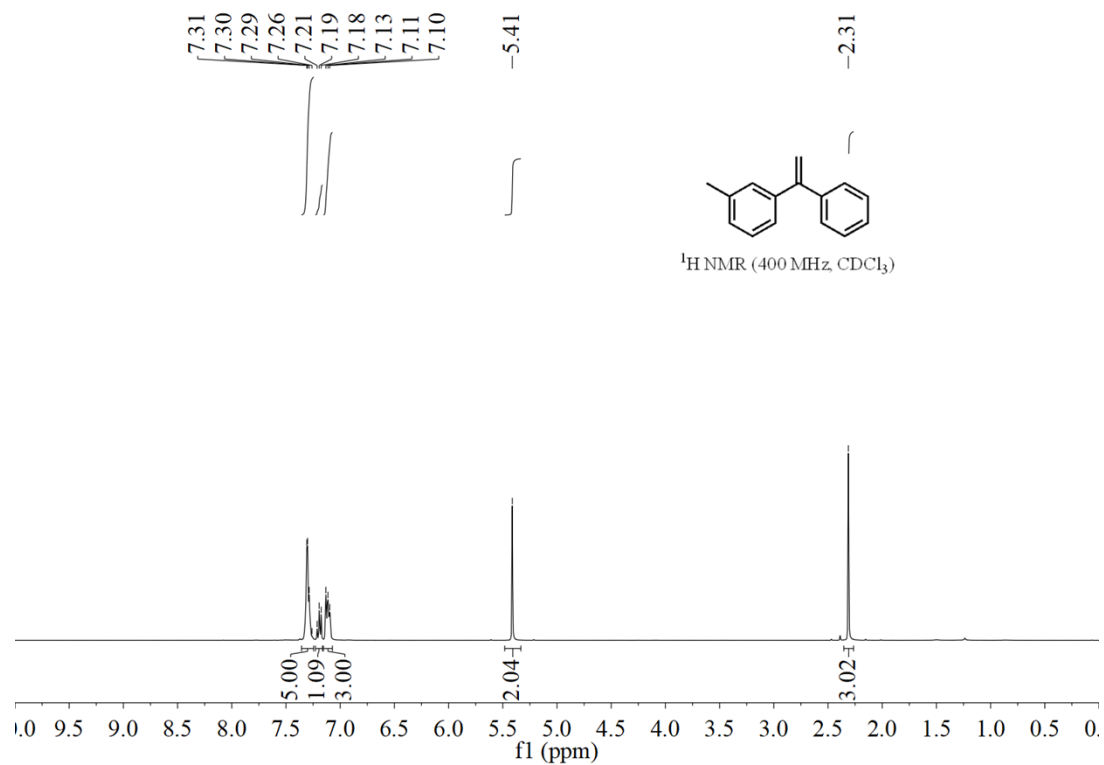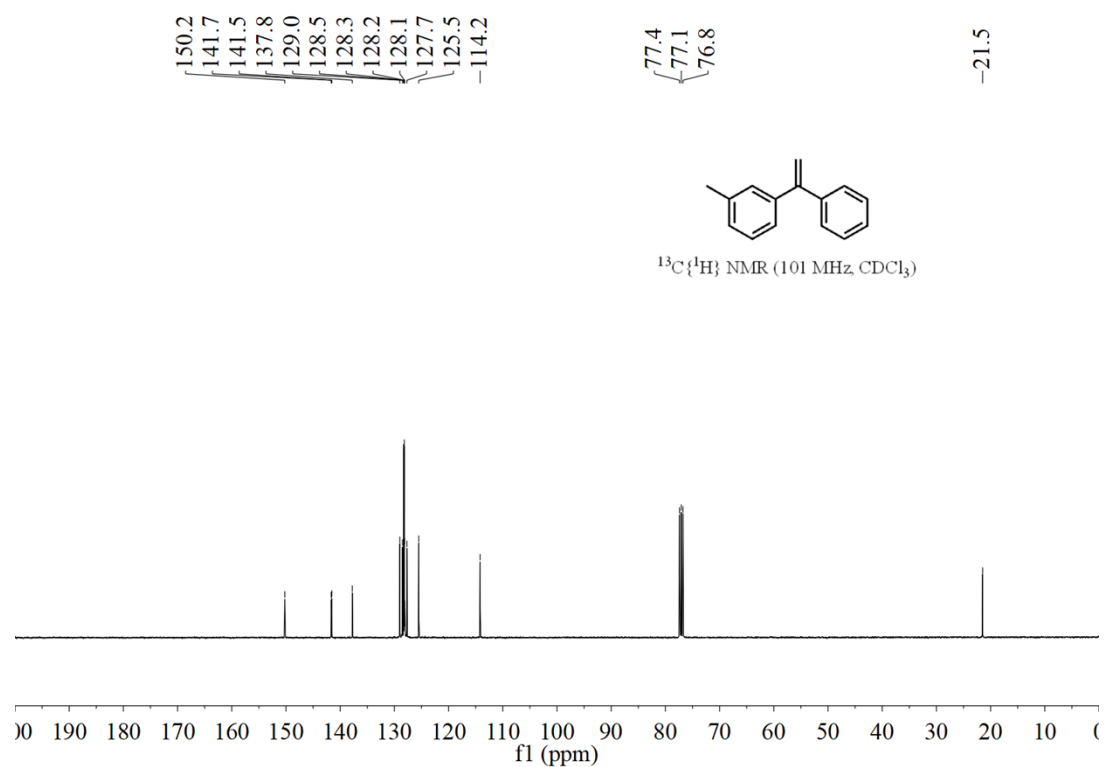



**1-(Tert-butyl)-4-(1-phenylvinyl)benzene (6)**

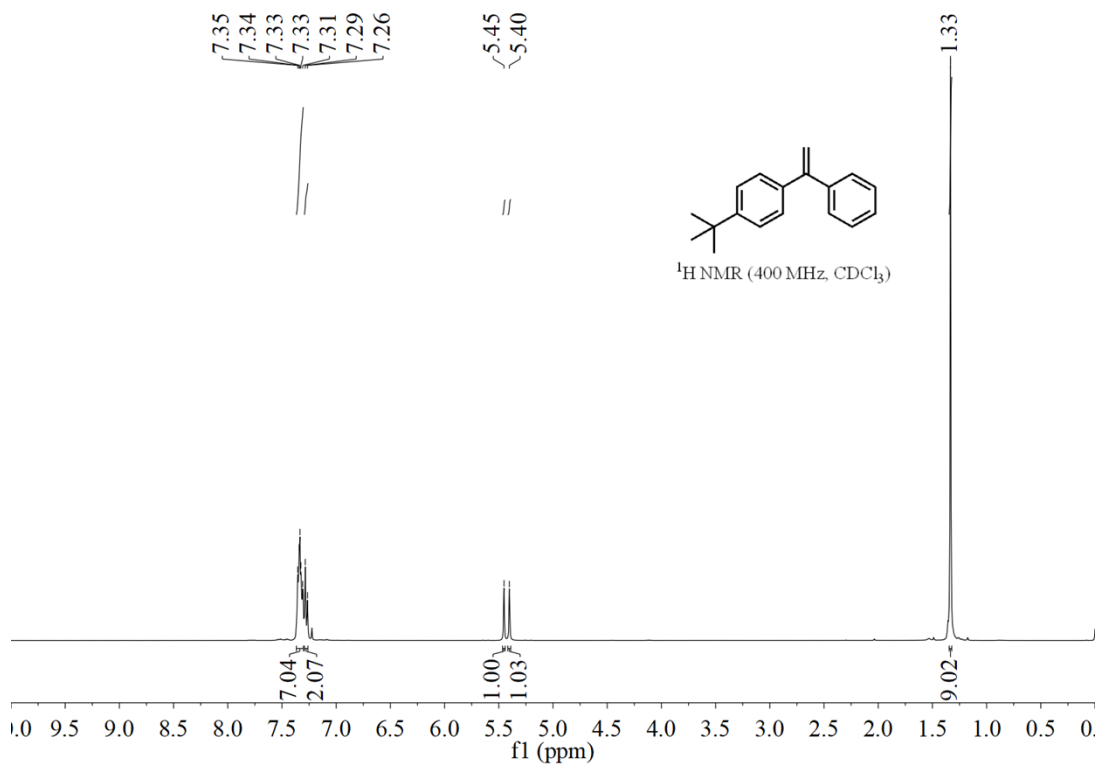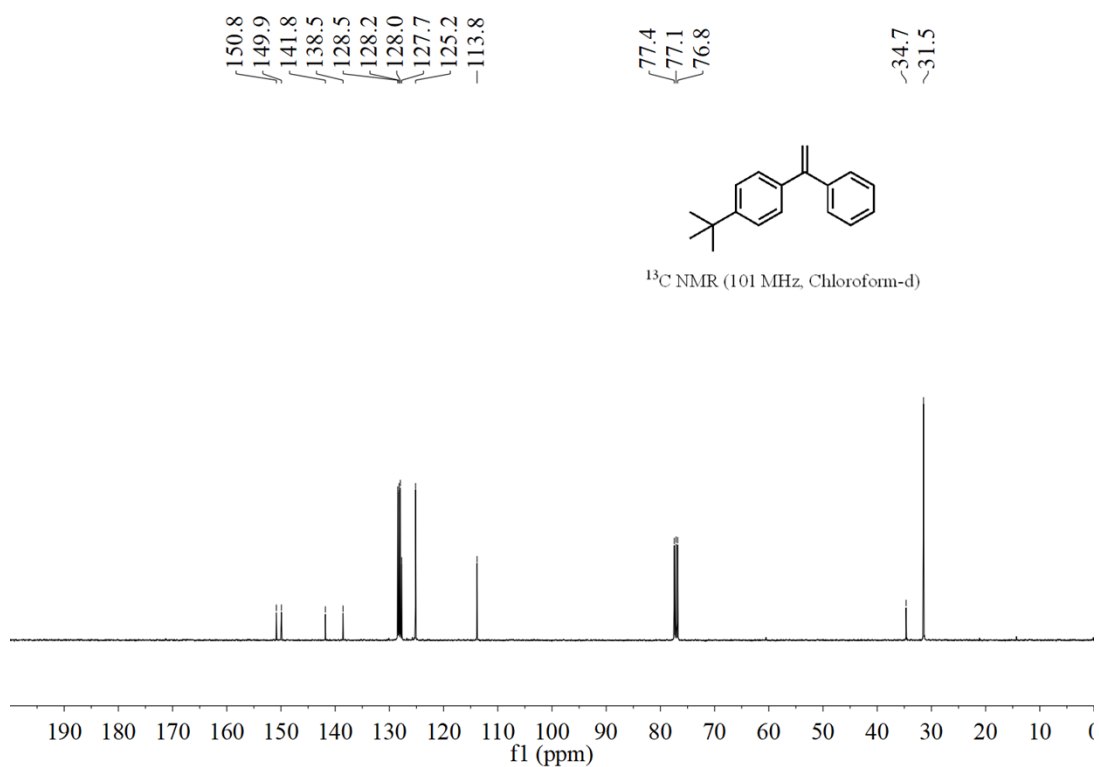

### 1-Methoxy-3-(1-phenylvinyl)benzene (7)

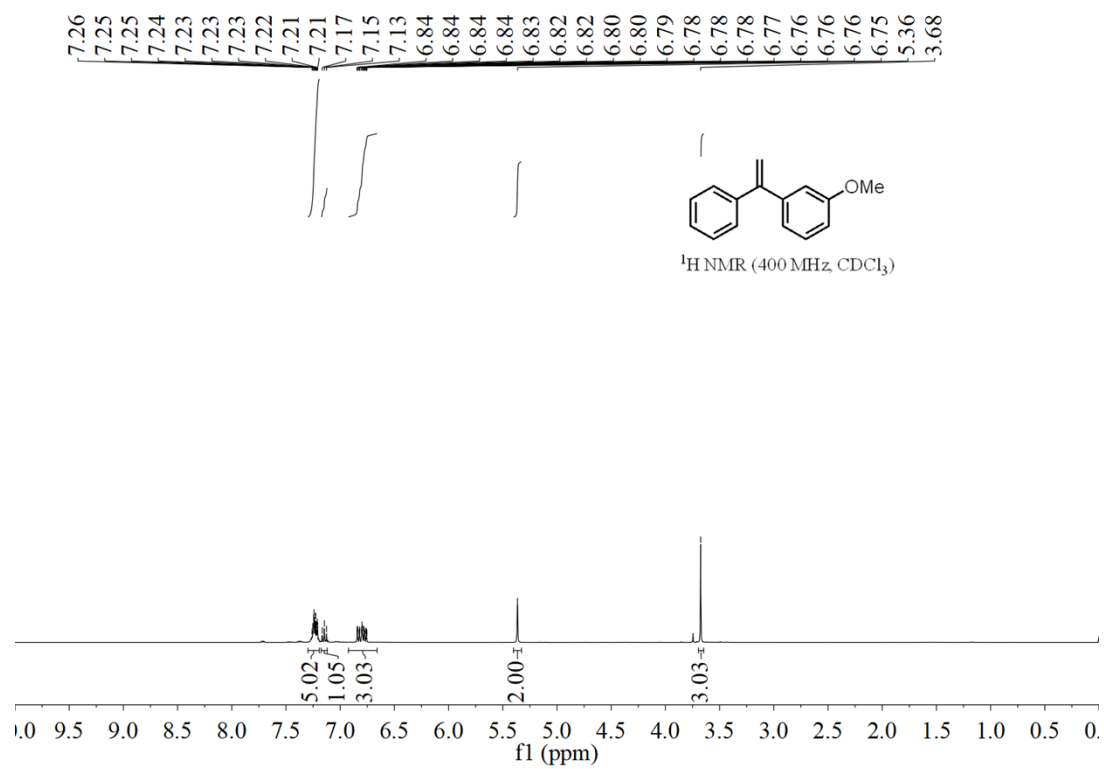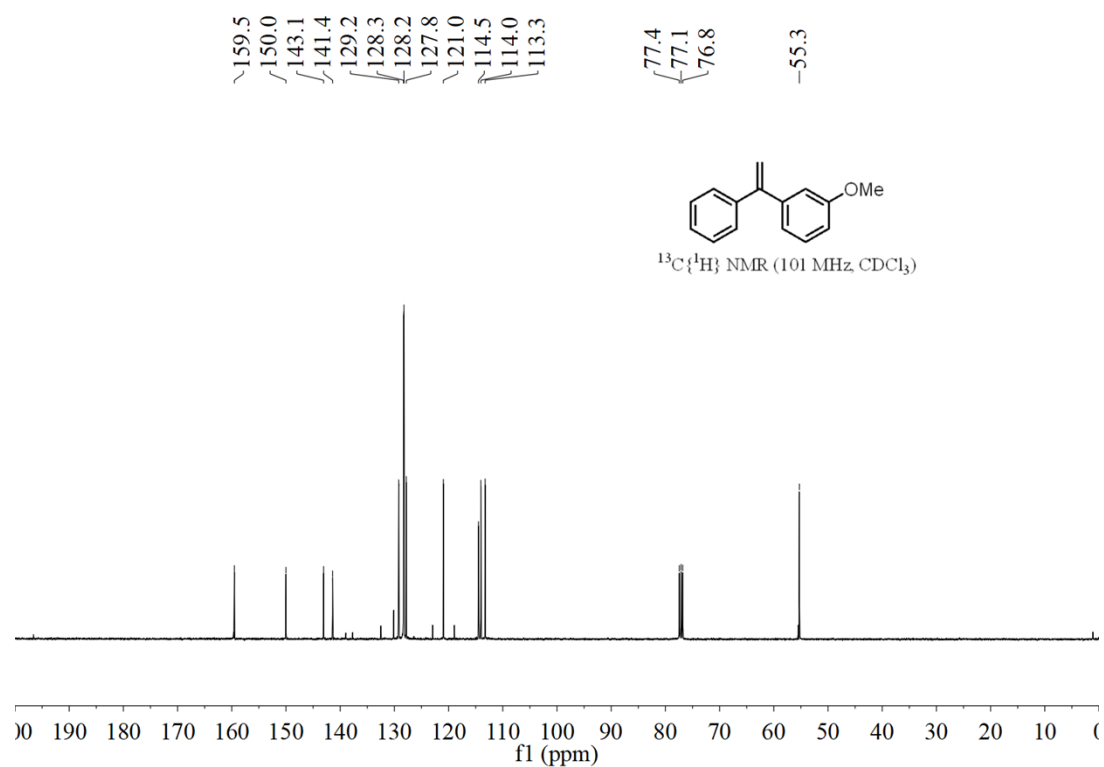

**1,2-Dimethoxy-4-(1-phenylvinyl)benzene (8)**

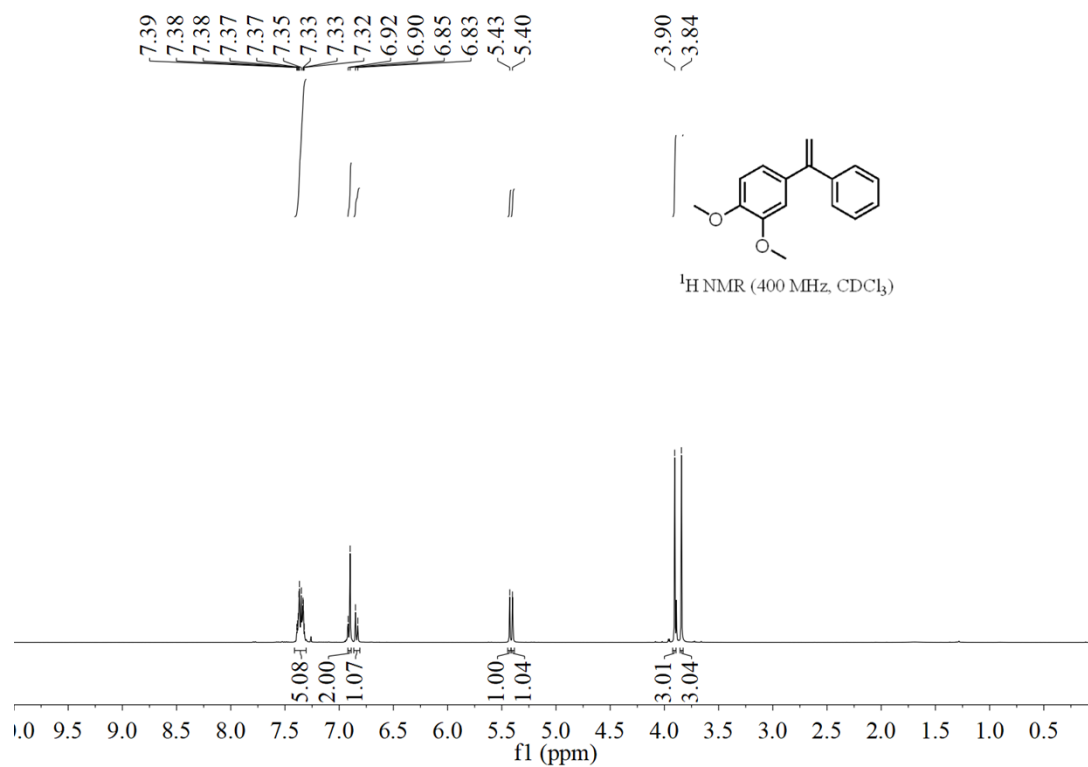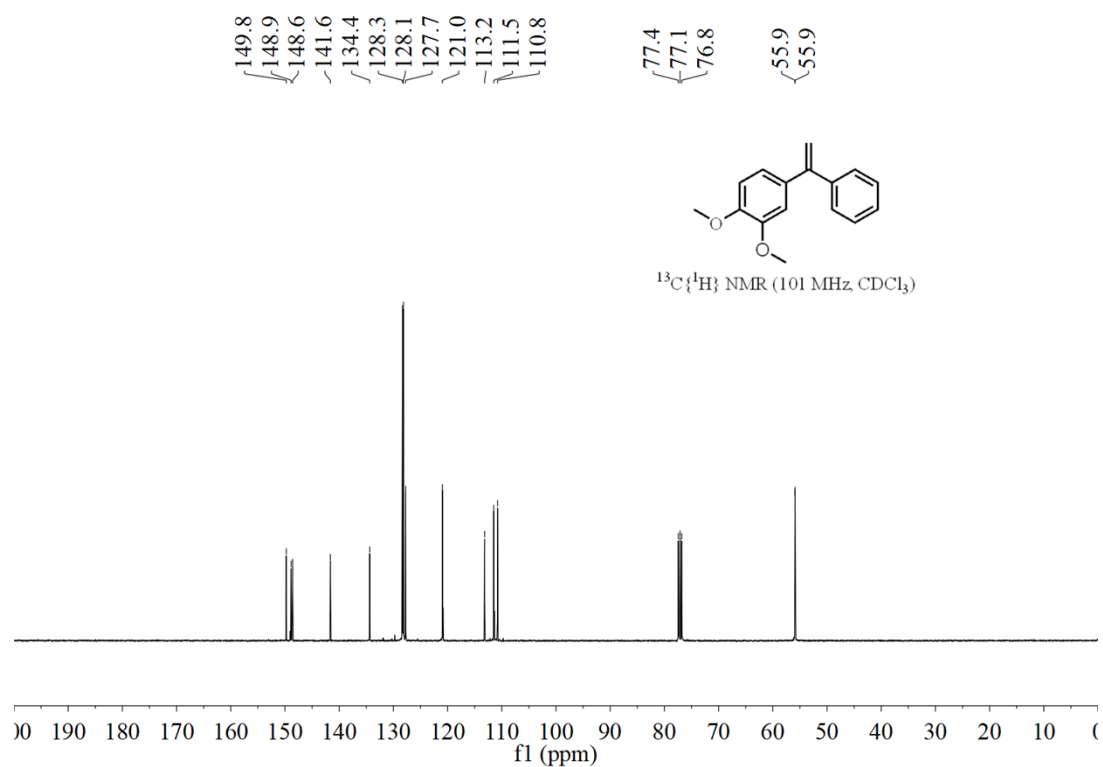

### 4-(1-Phenylvinyl)-1,1'-biphenyl (9)

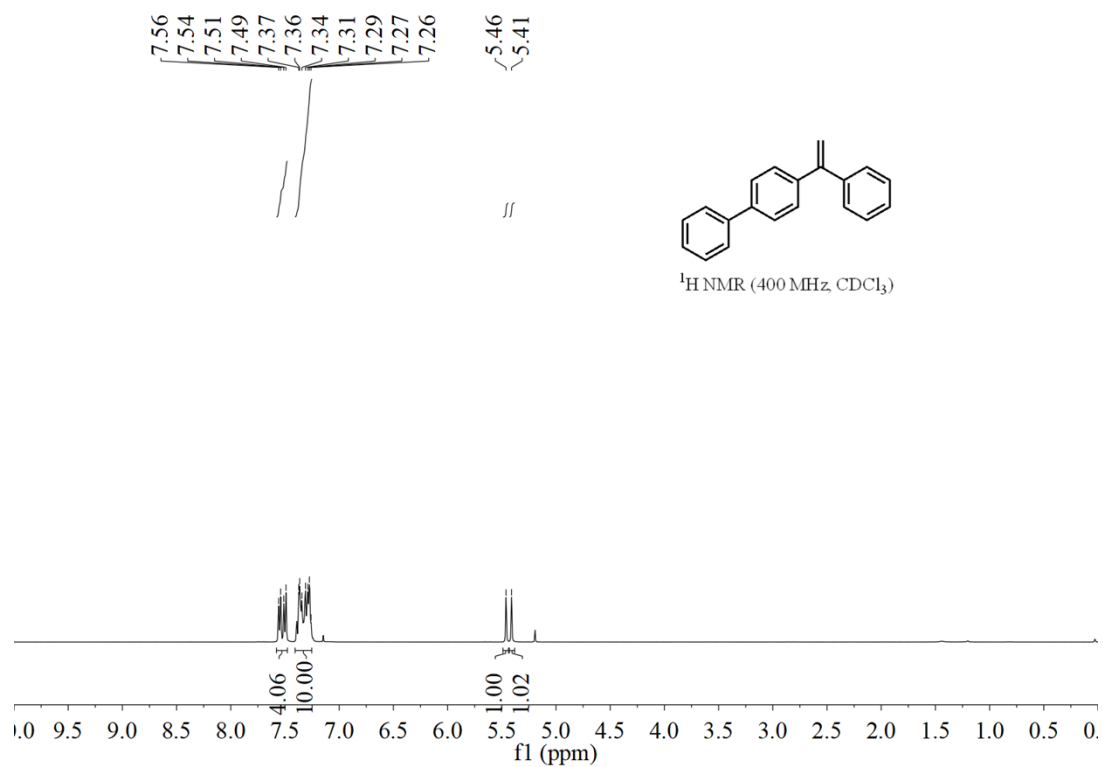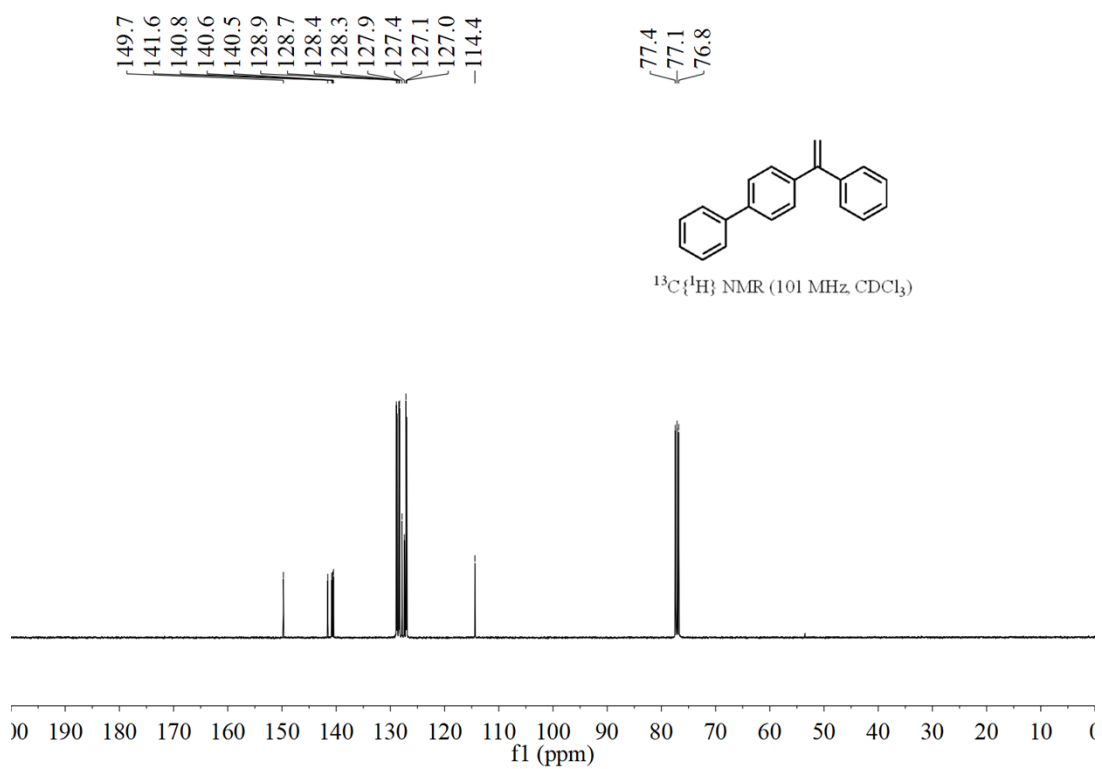

### 2-(1-Phenylvinyl)naphthalene (10)

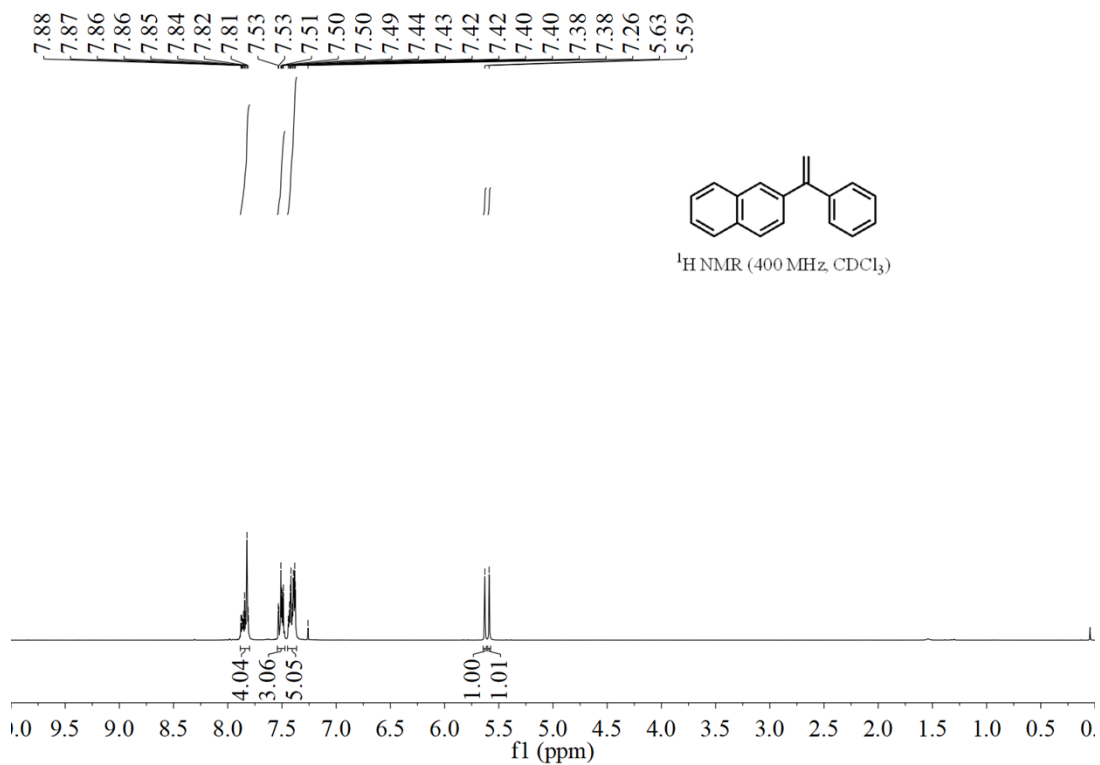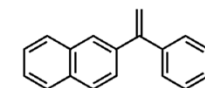

<sup>1</sup>H NMR (400 MHz CDCl<sub>3</sub>)

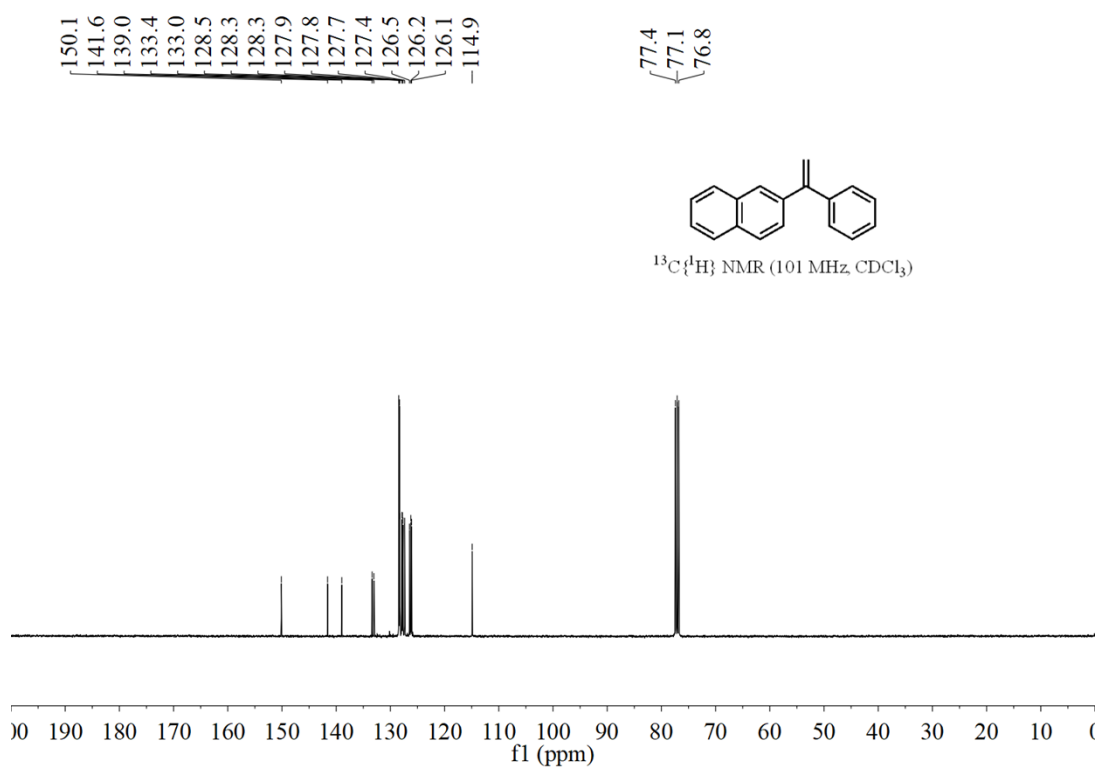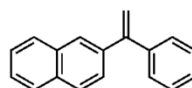

<sup>13</sup>C NMR (101 MHz CDCl<sub>3</sub>)

### 1-(1-Phenylvinyl)-4-vinylbenzene (11)

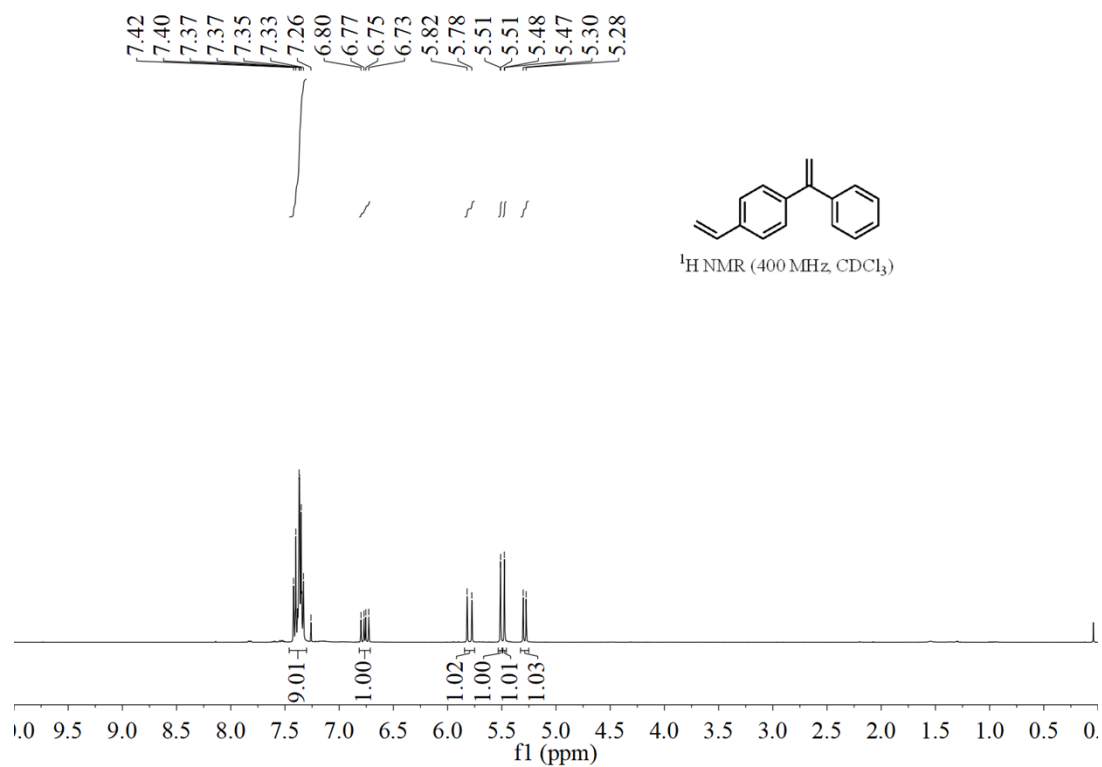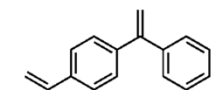

<sup>1</sup>H NMR (400 MHz, CDCl<sub>3</sub>)

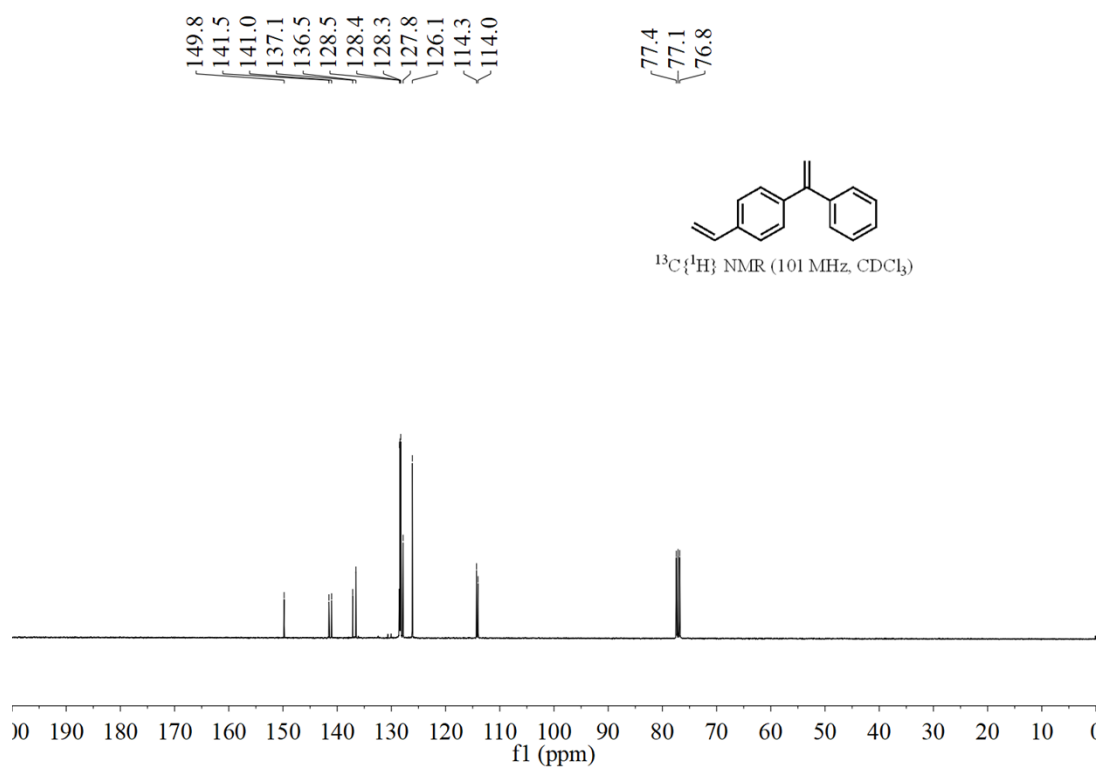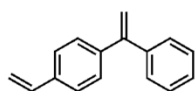

<sup>13</sup>C {<sup>1</sup>H} NMR (101 MHz, CDCl<sub>3</sub>)

**Methyl(4-(1-phenylvinyl)phenyl)sulfane (12)**

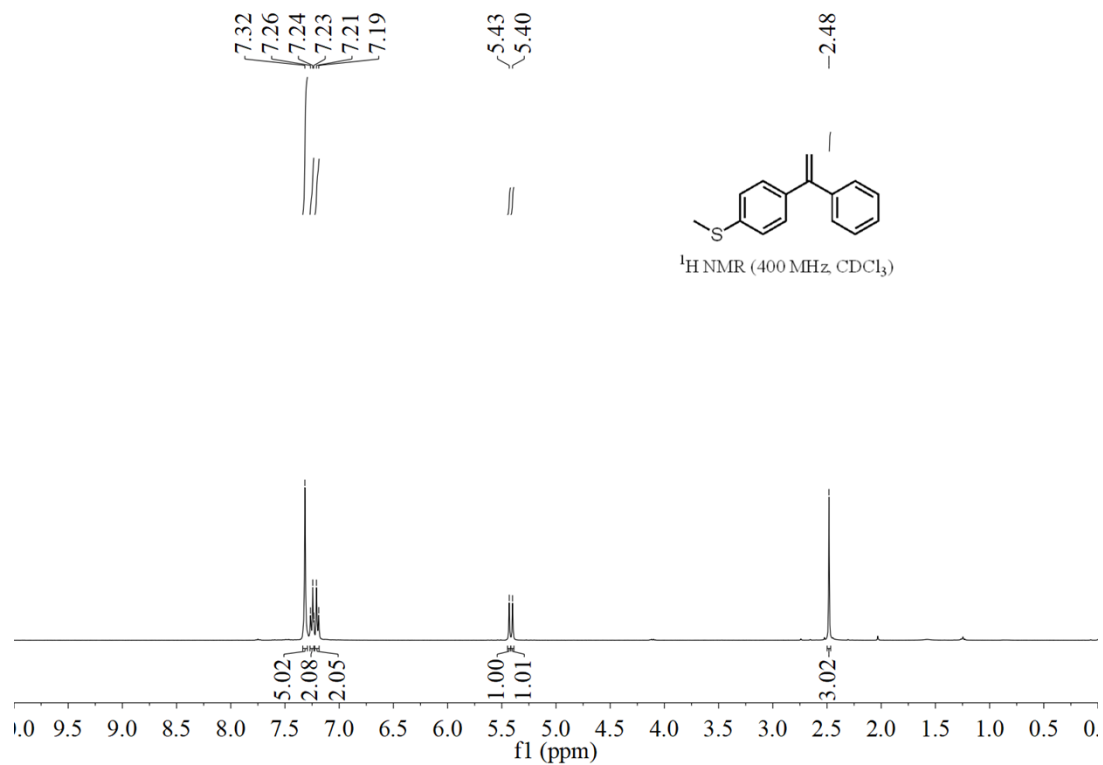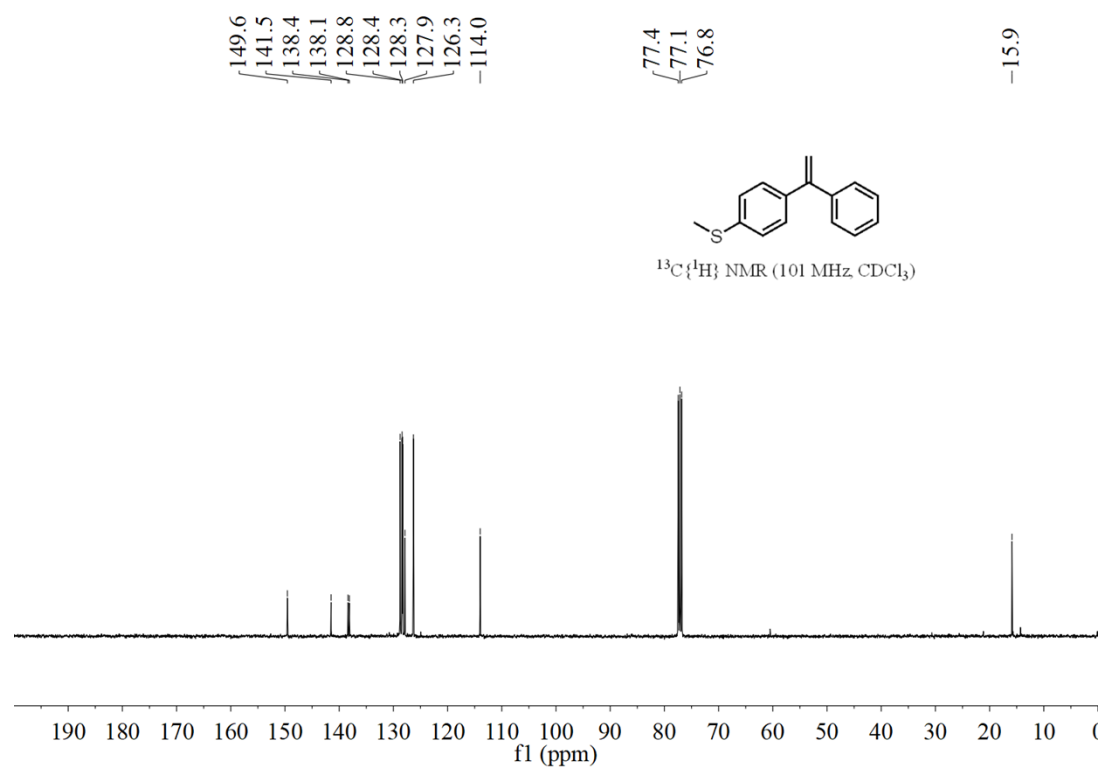

**Methyl(2-(1-phenylvinyl)phenyl)sulfane (13)**

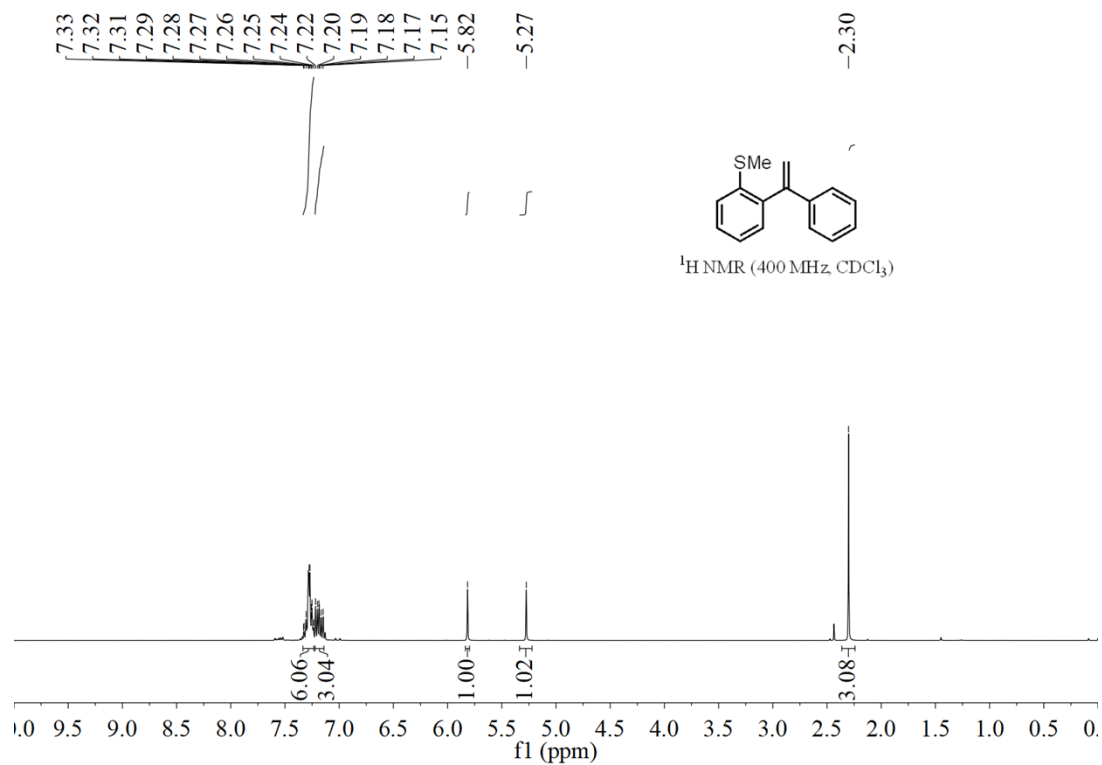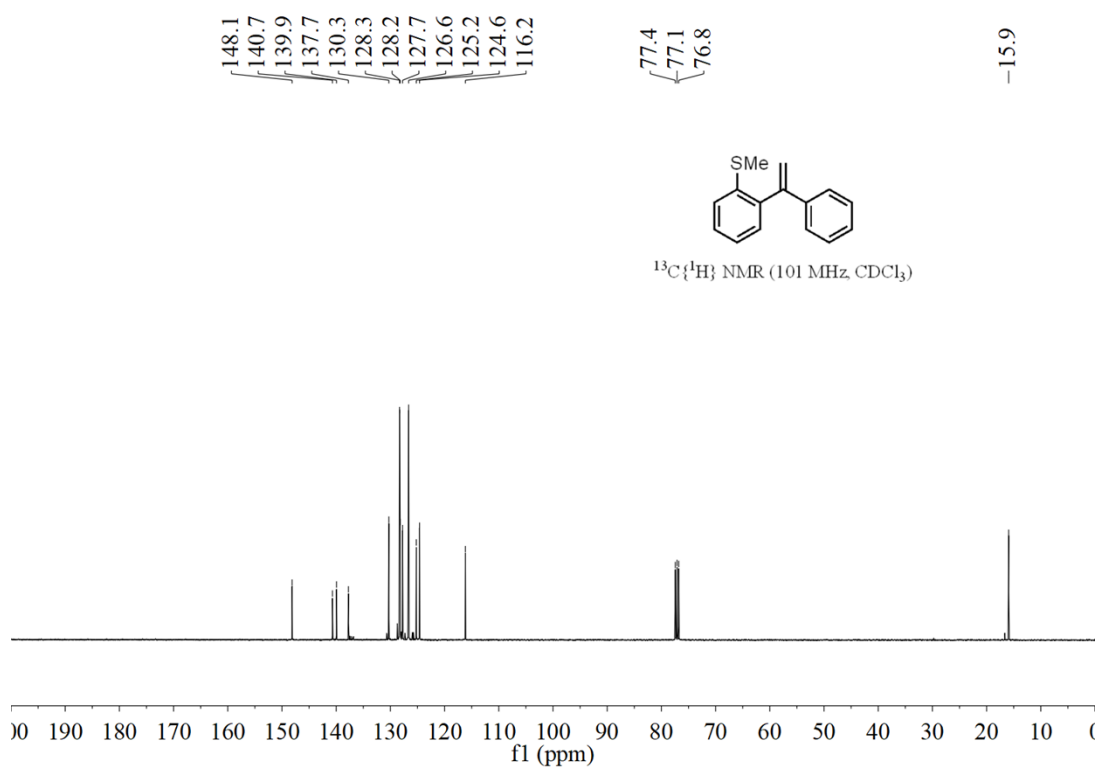



### Trimethyl(4-(1-phenylvinyl)phenyl)silane (14)

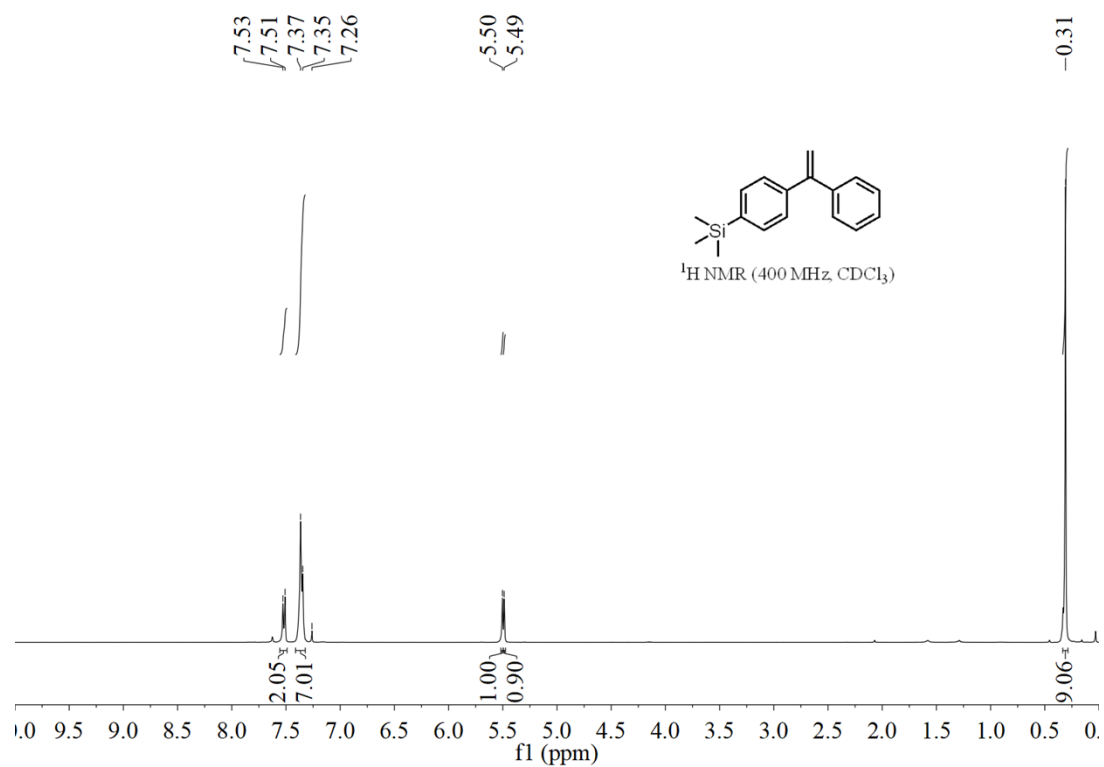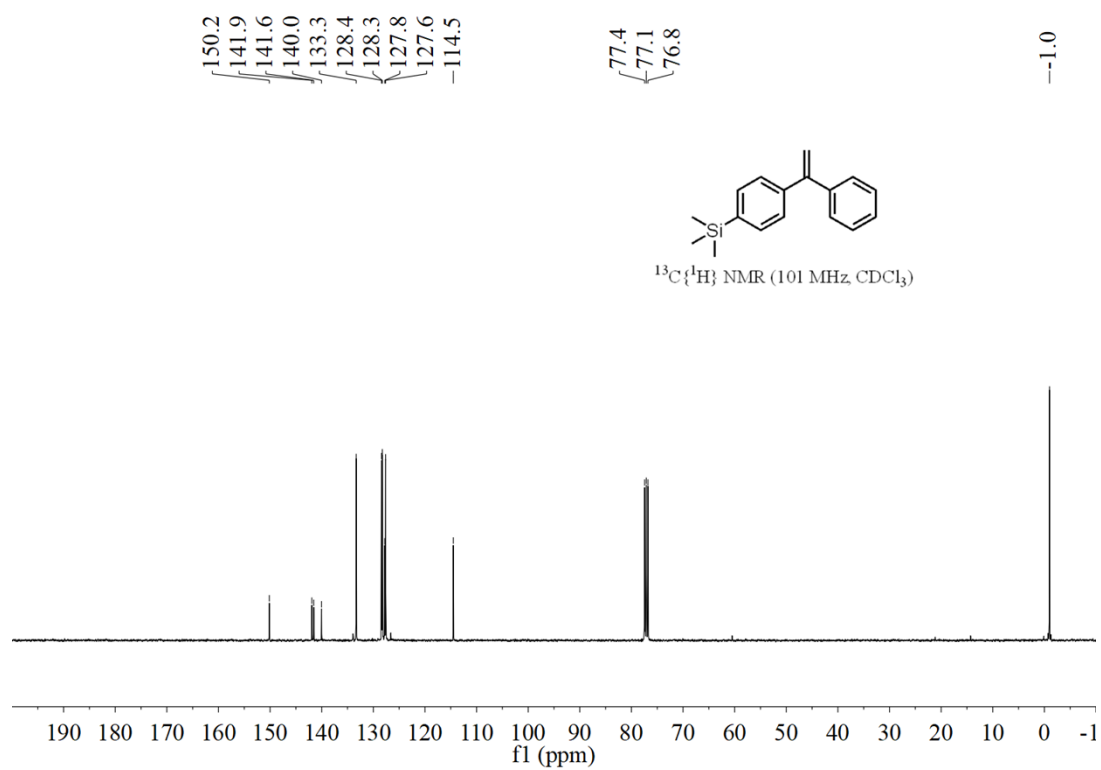

**1-(1-Phenylvinyl)-4-(trifluoromethoxy)benzene (15)**

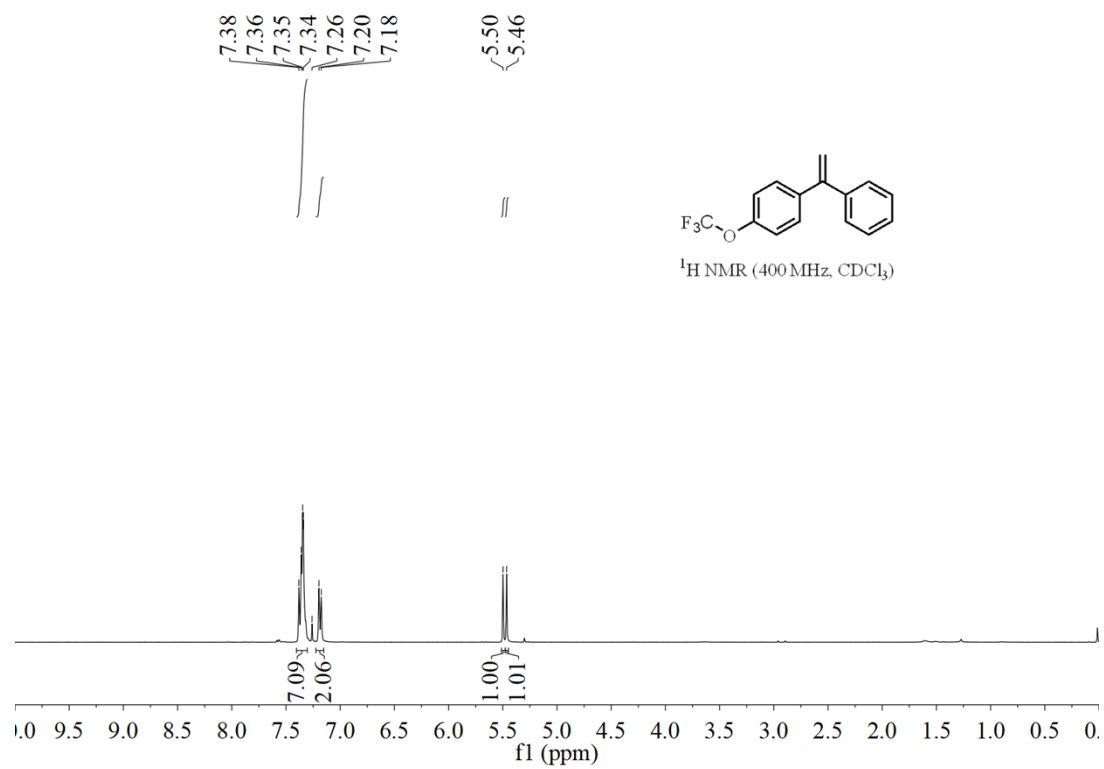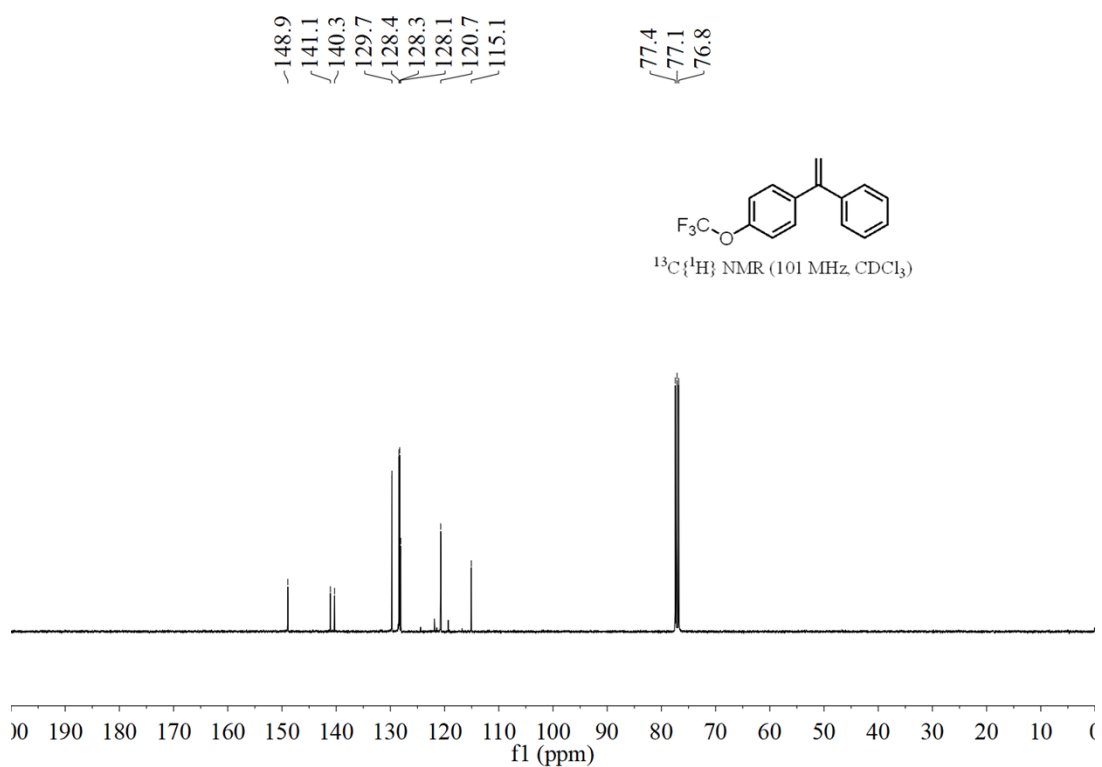

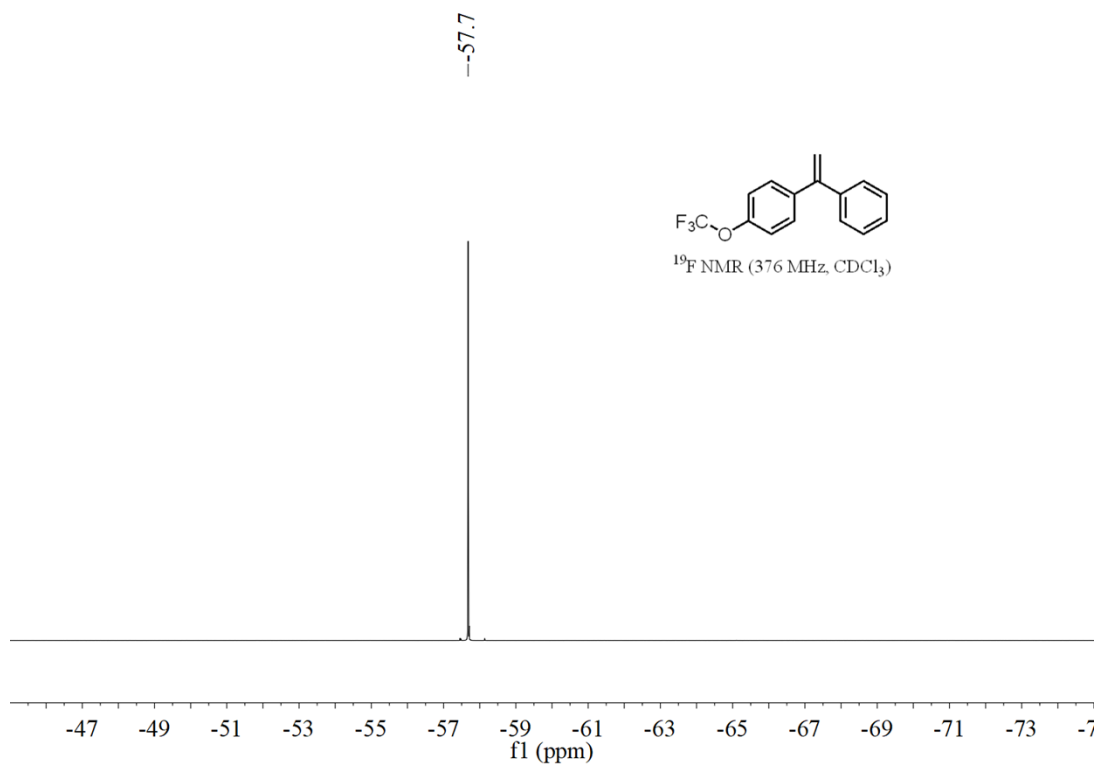

**1-(1-Phenylvinyl)-4-(trifluoromethyl)benzene (16)**

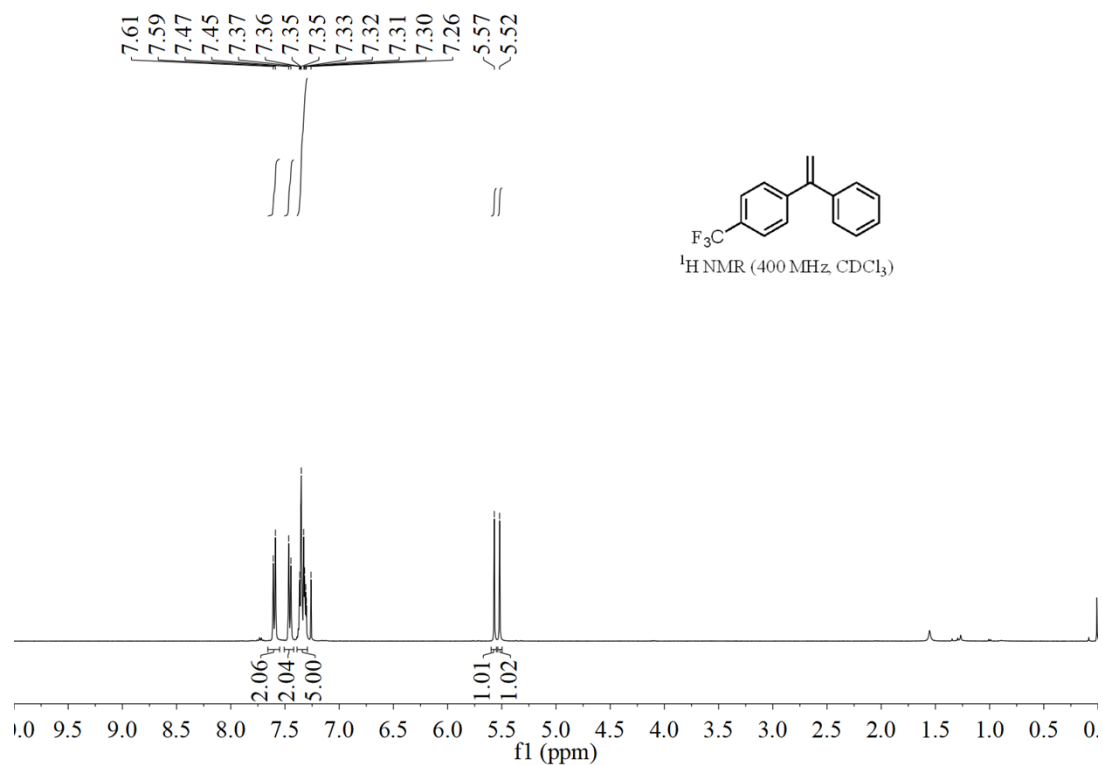

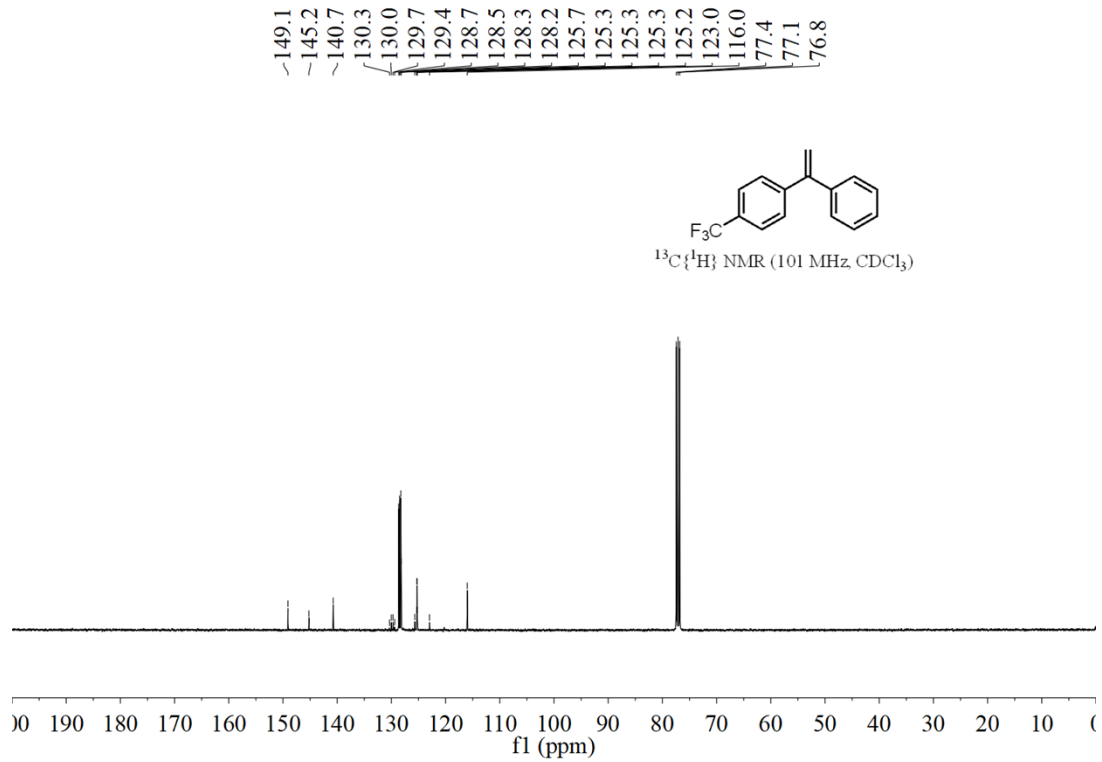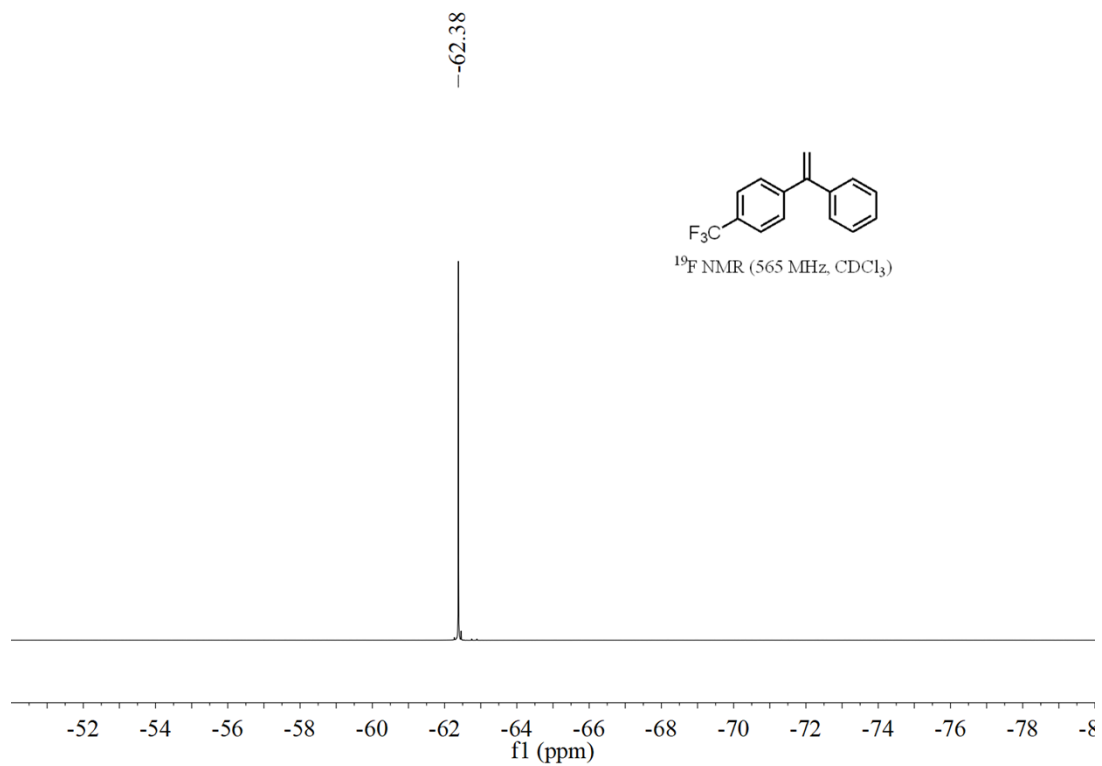

**1-Fluoro-4-(1-phenylvinyl)benzene (17)**

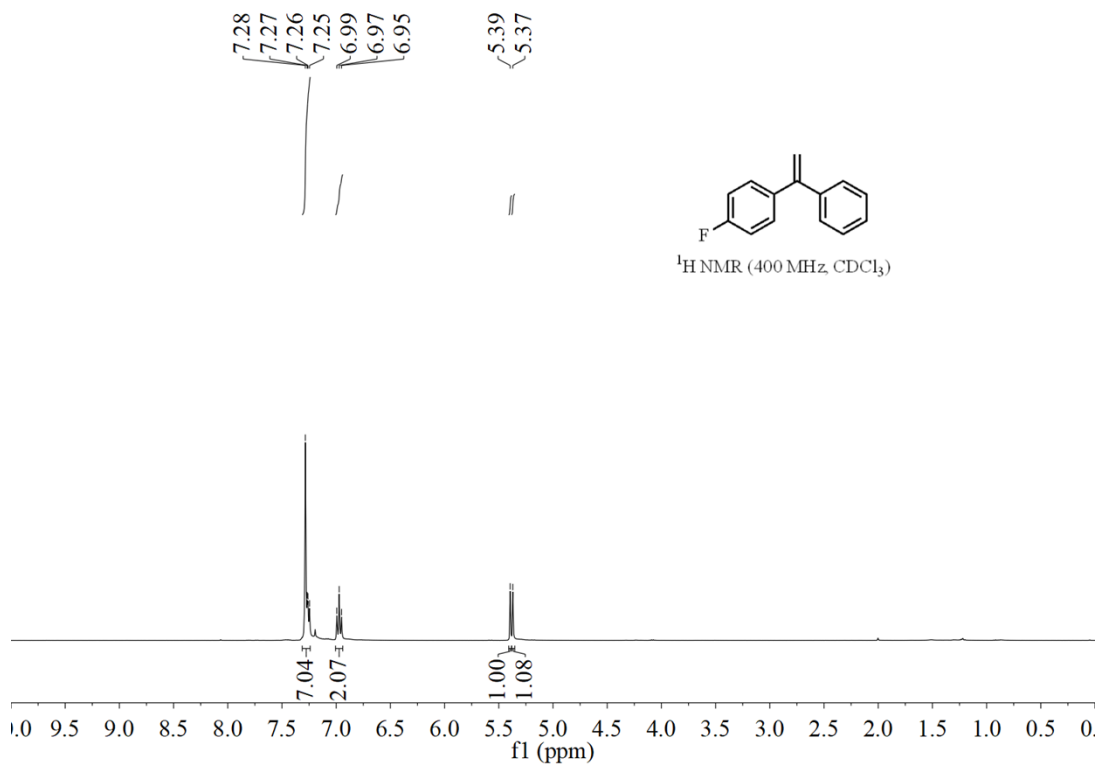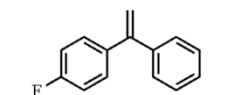

<sup>1</sup>H NMR (400 MHz, CDCl<sub>3</sub>)

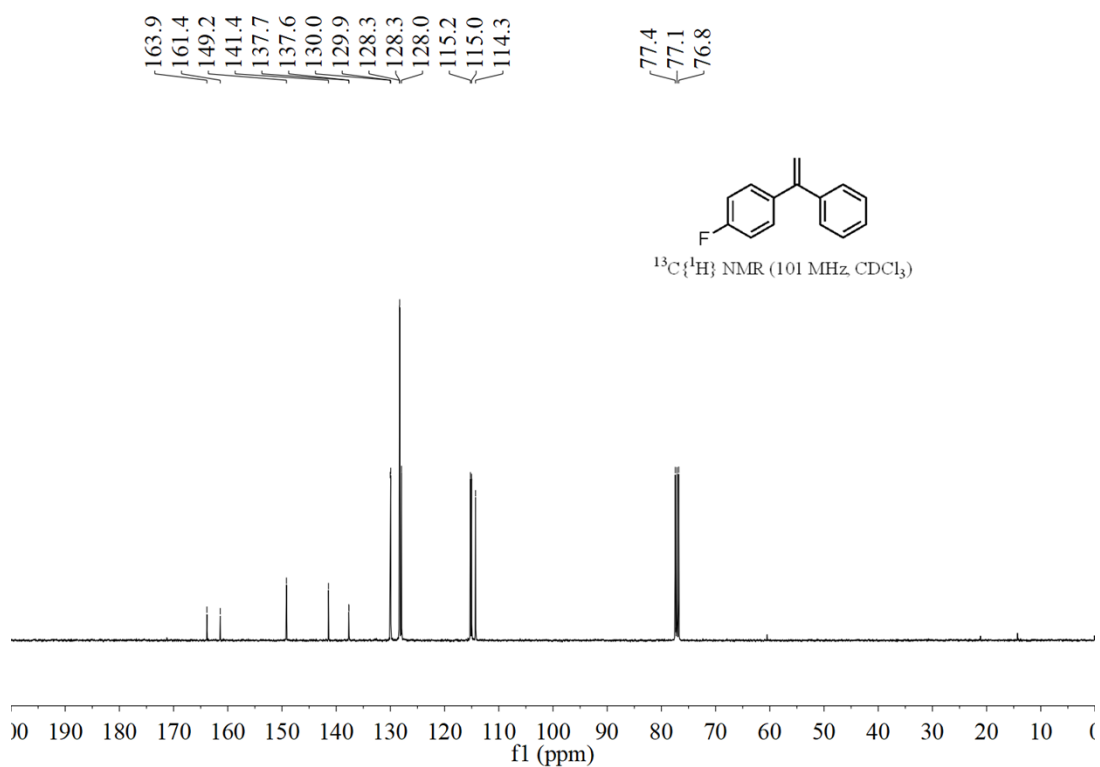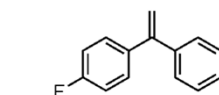

<sup>13</sup>C {<sup>1</sup>H} NMR (101 MHz, CDCl<sub>3</sub>)

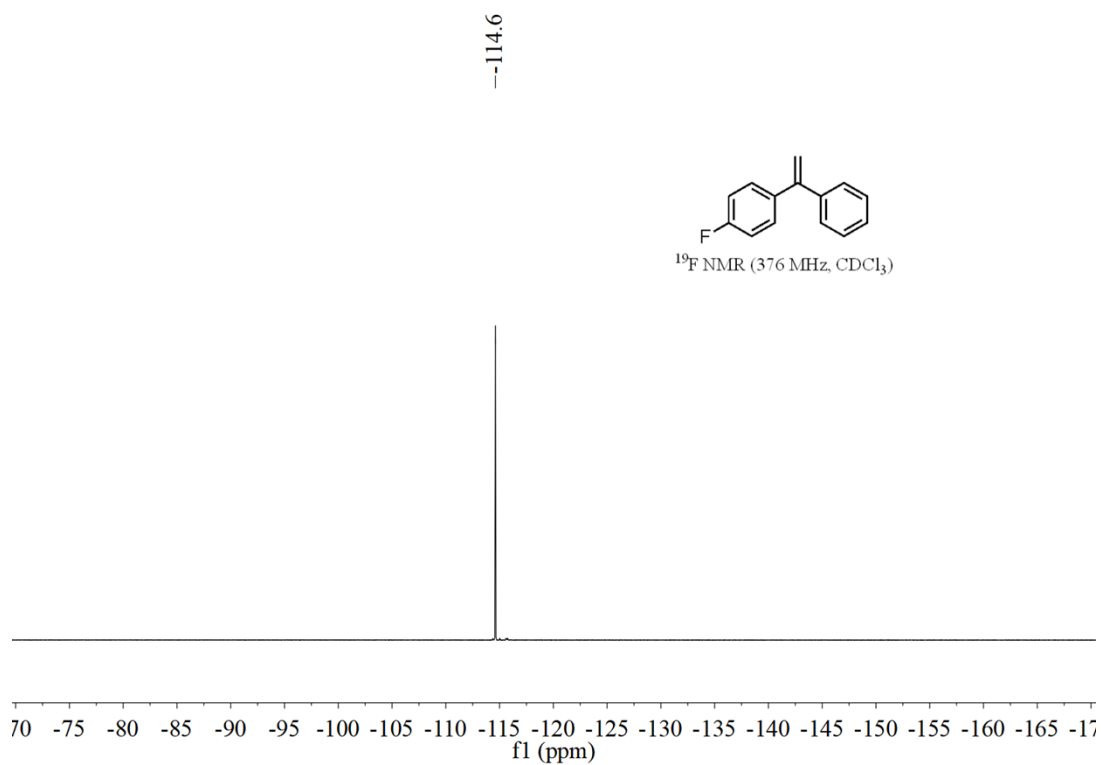

**2,4-Difluoro-1-(1-phenylvinyl)benzene (18)**

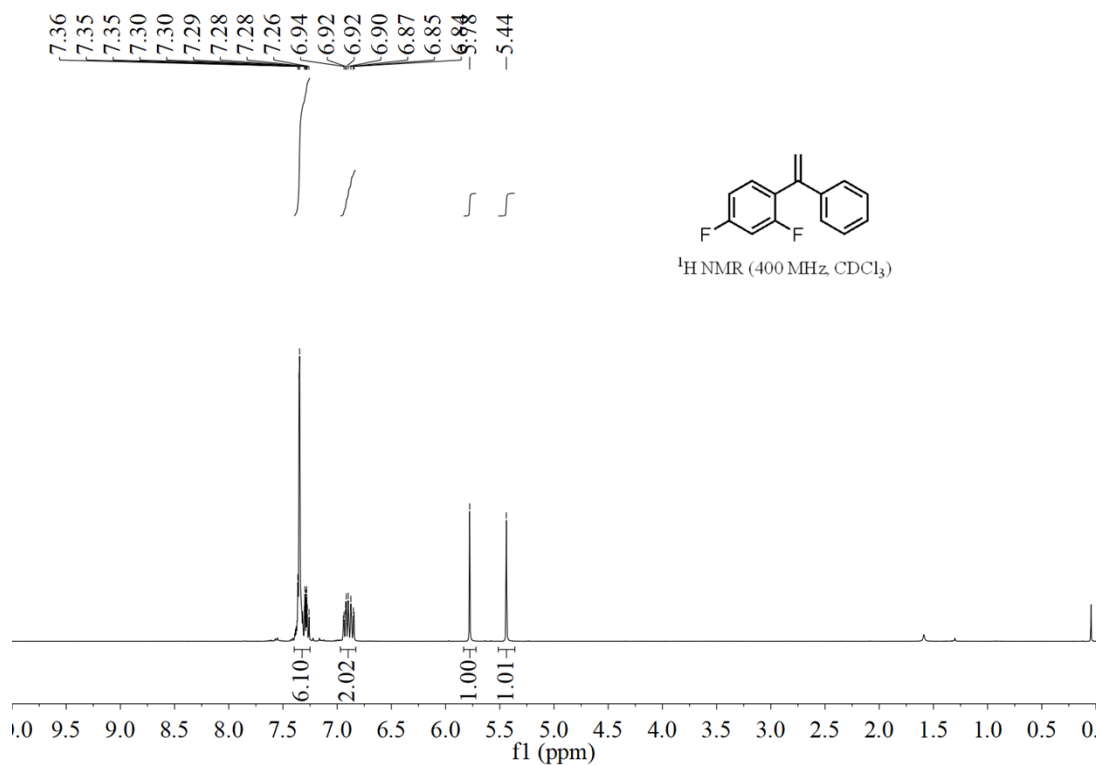

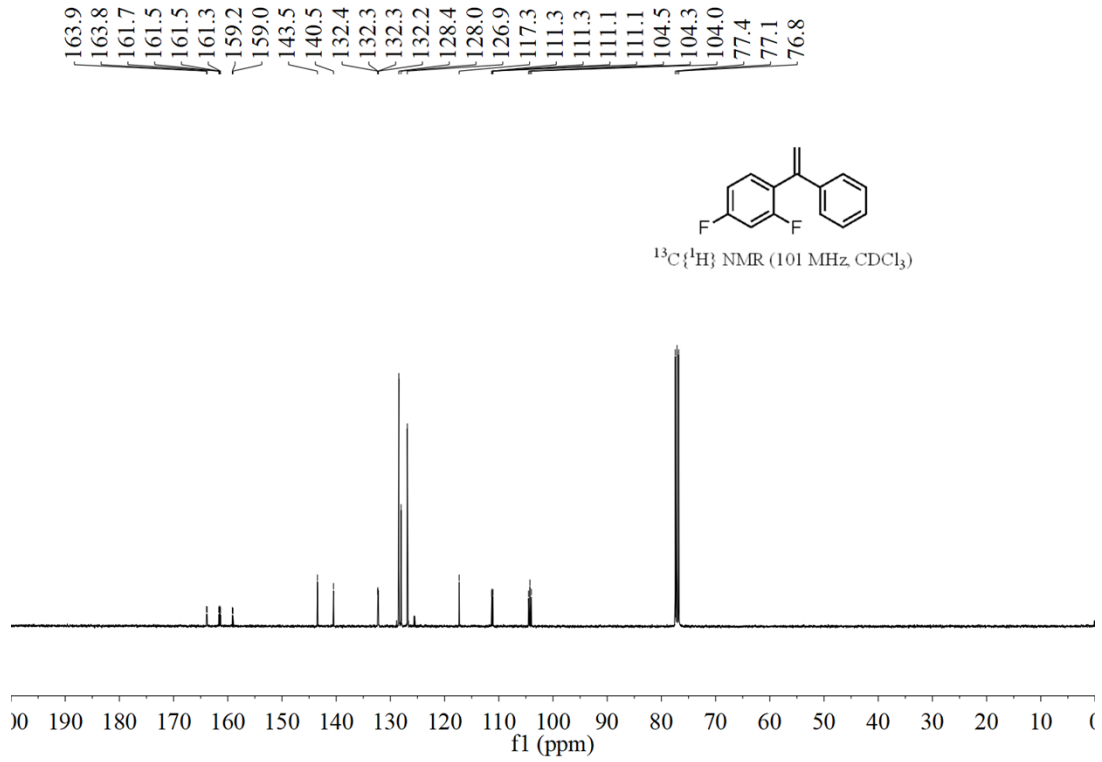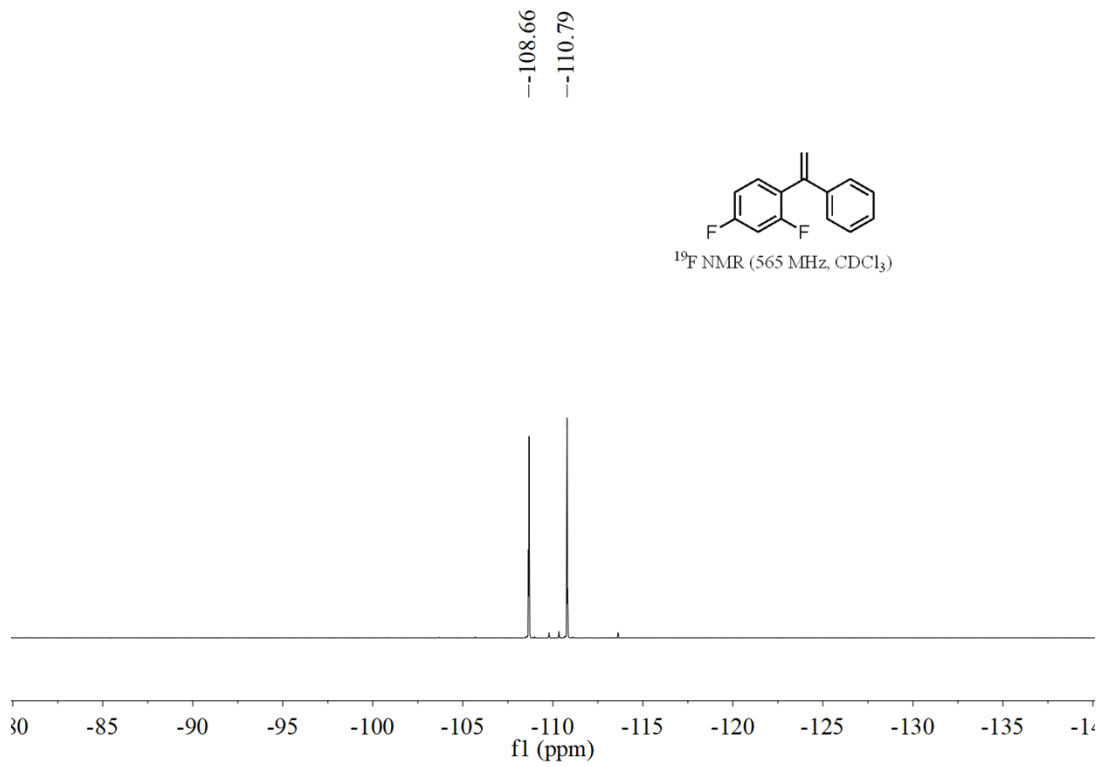

### 1-Chloro-2-(1-phenylvinyl)benzene (19)

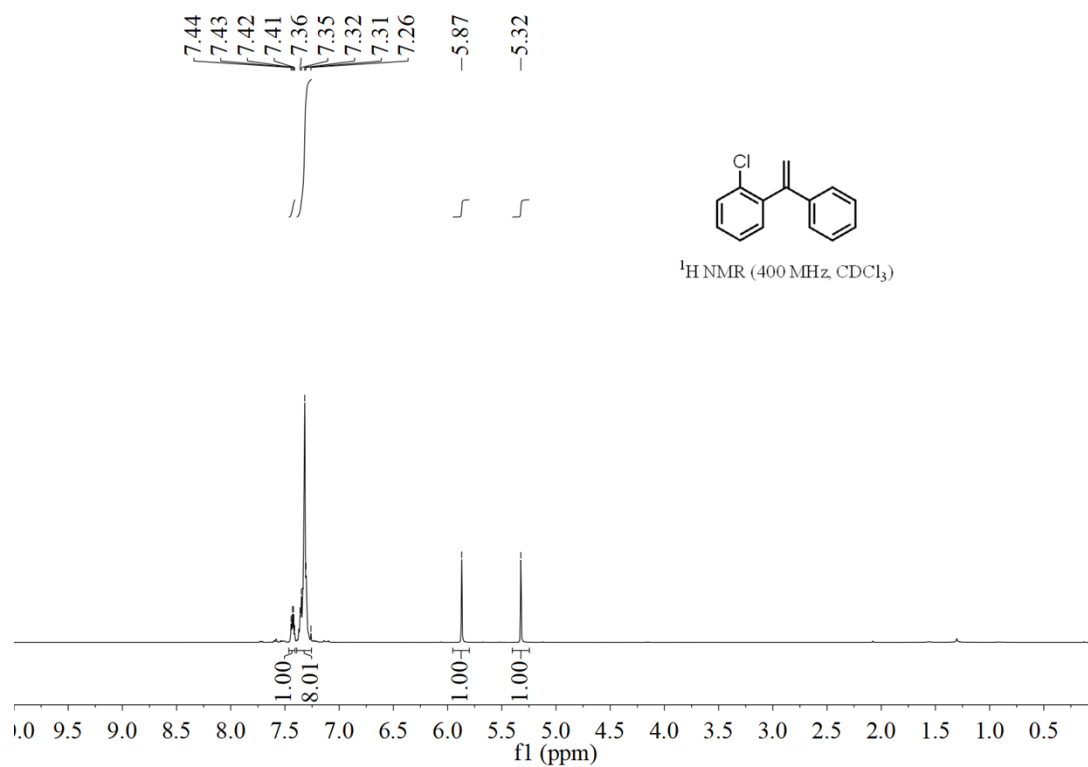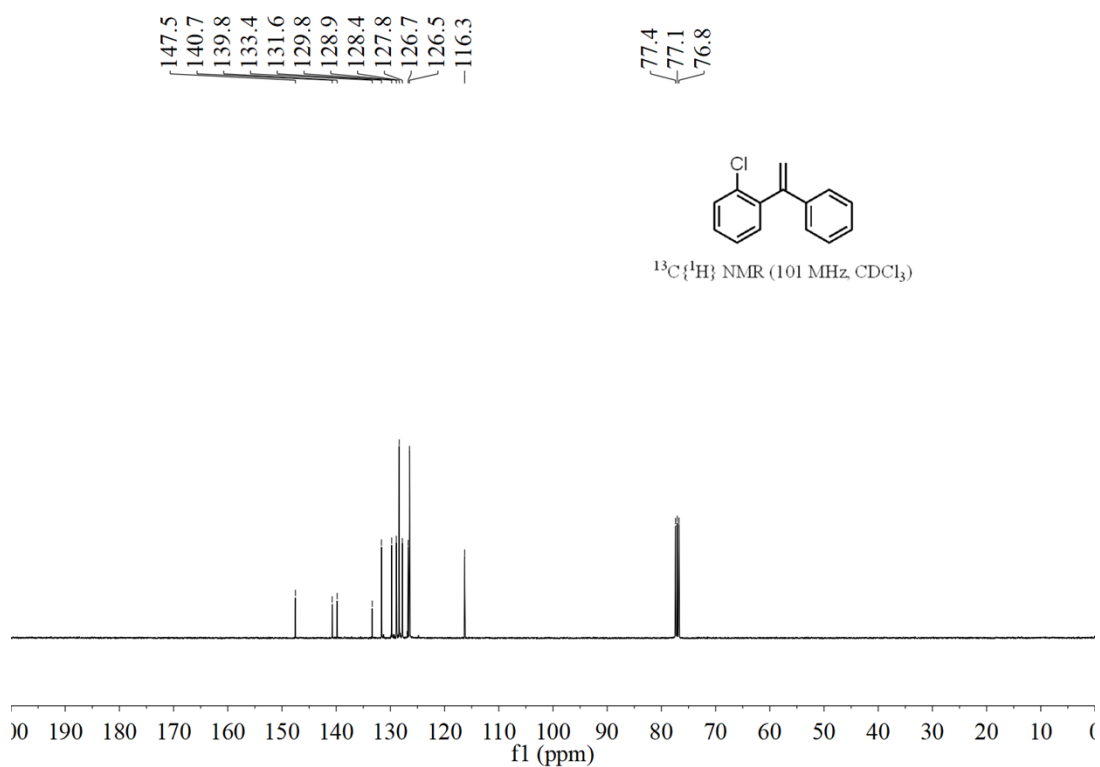



### 1-Chloro-3-(1-phenylvinyl)benzene (20)

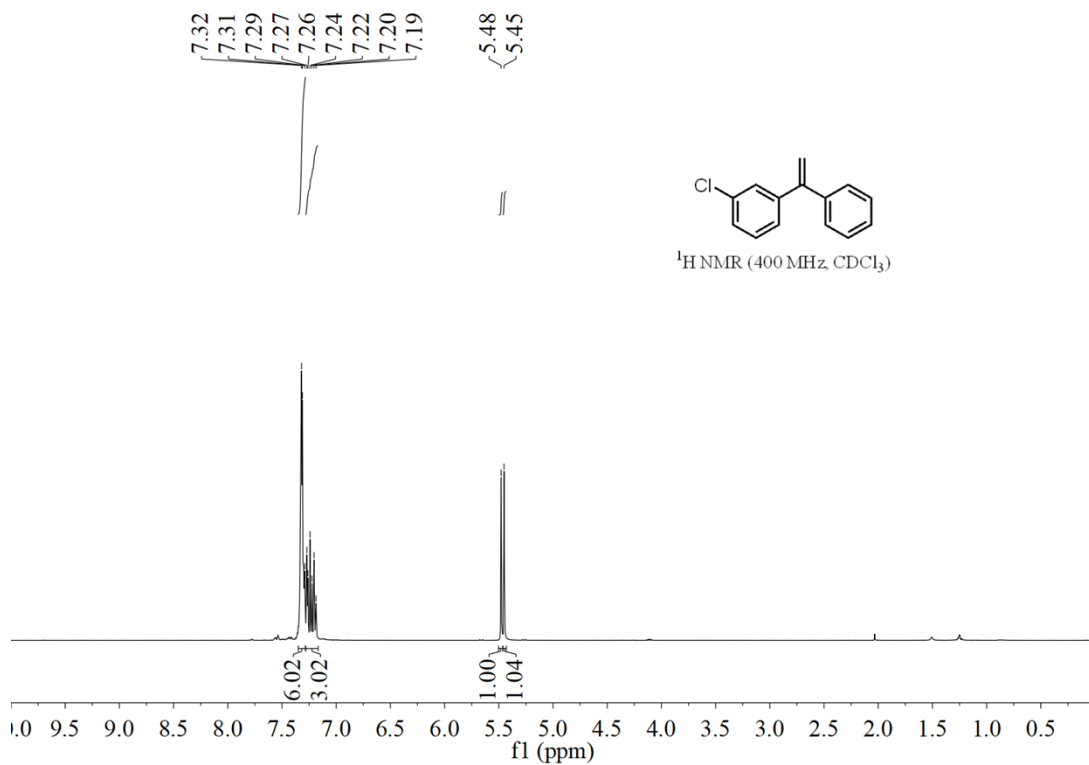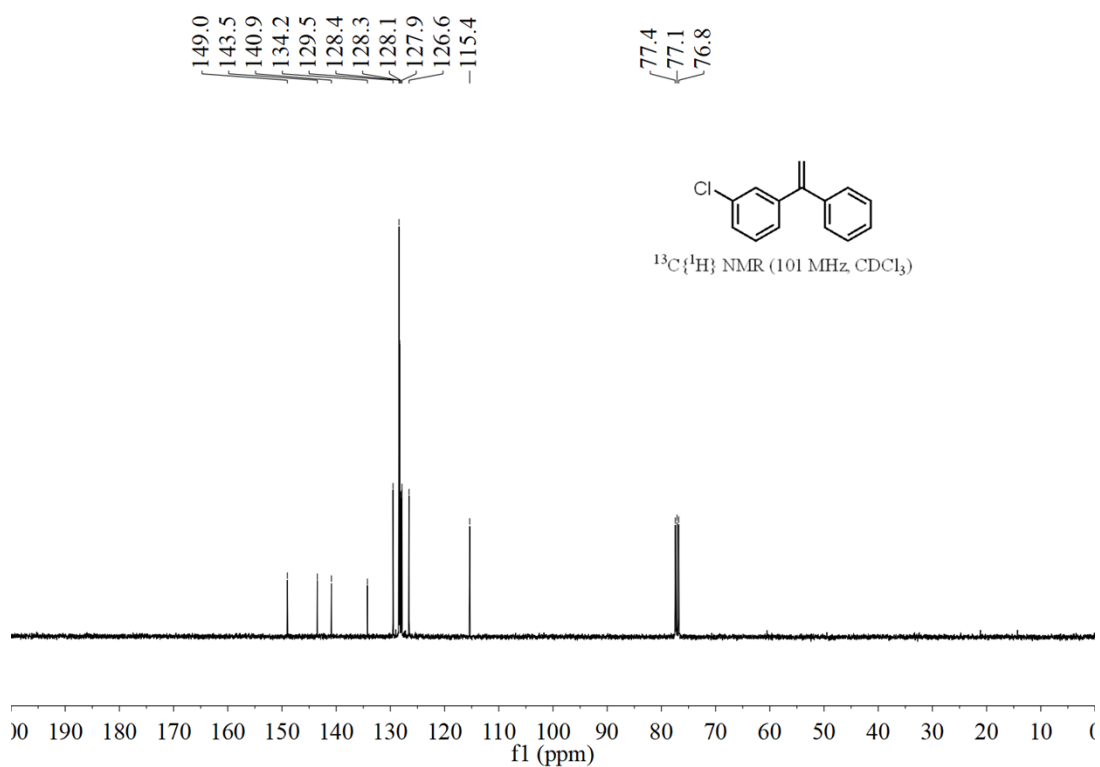

**2,4-Dichloro-1-(1-phenylvinyl)benzene (21)**

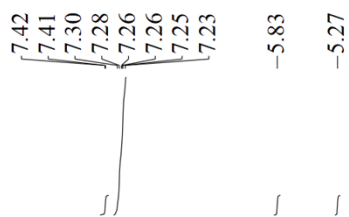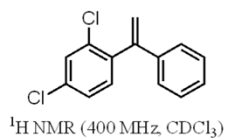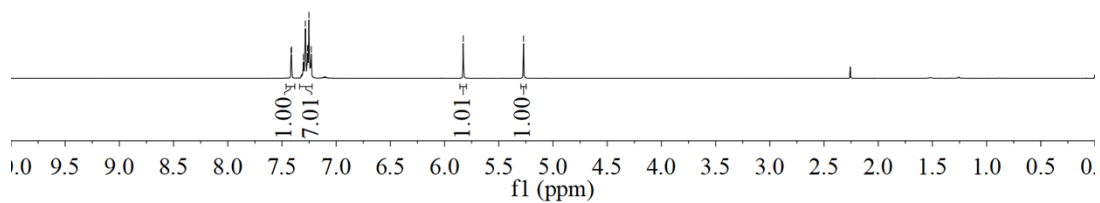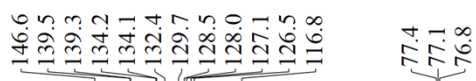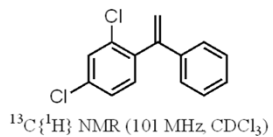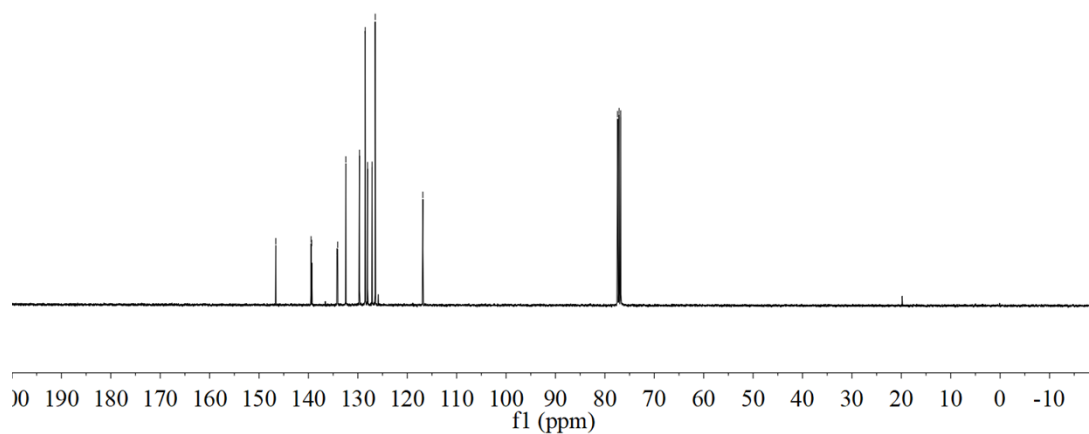

**1-Bromo-4-(1-phenylvinyl)benzene (22)**

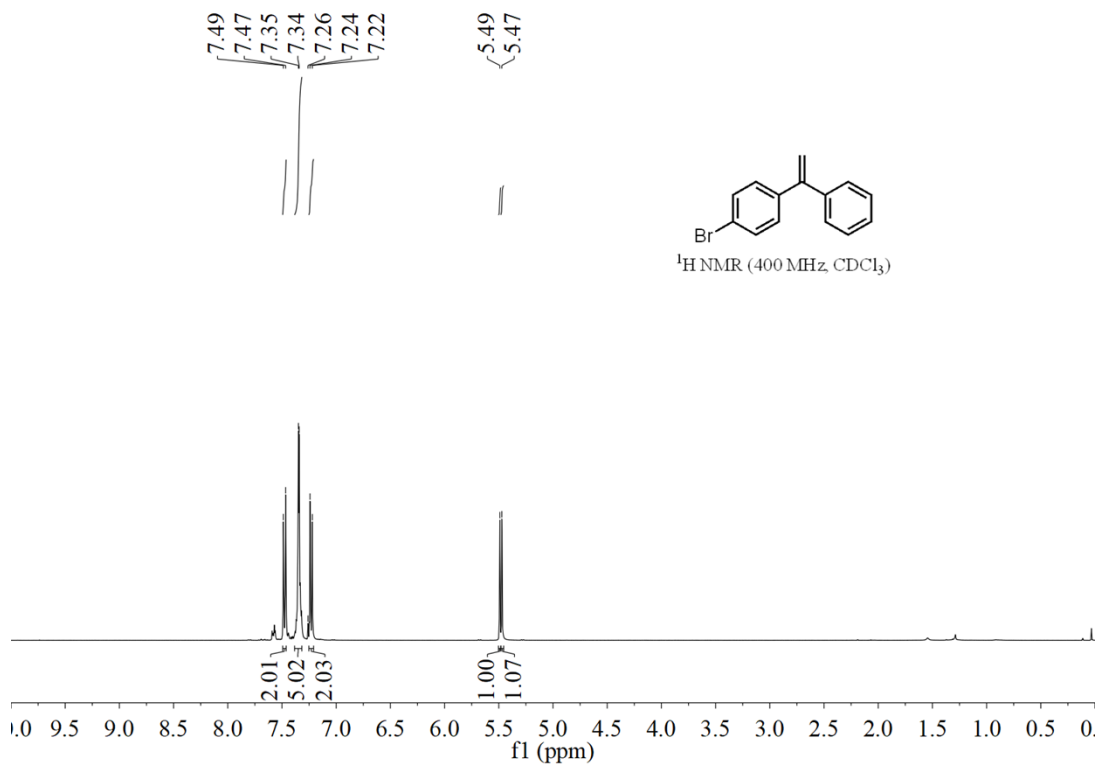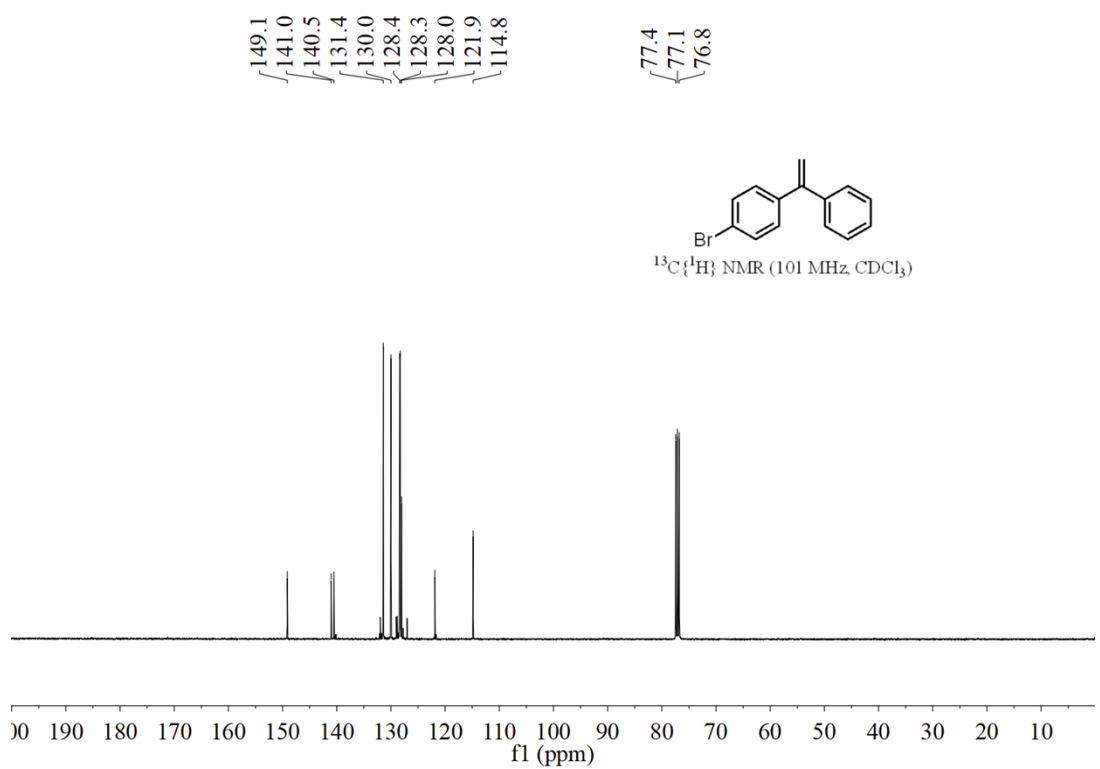

**1-Nitro-3-(1-phenylvinyl)benzene (23)**

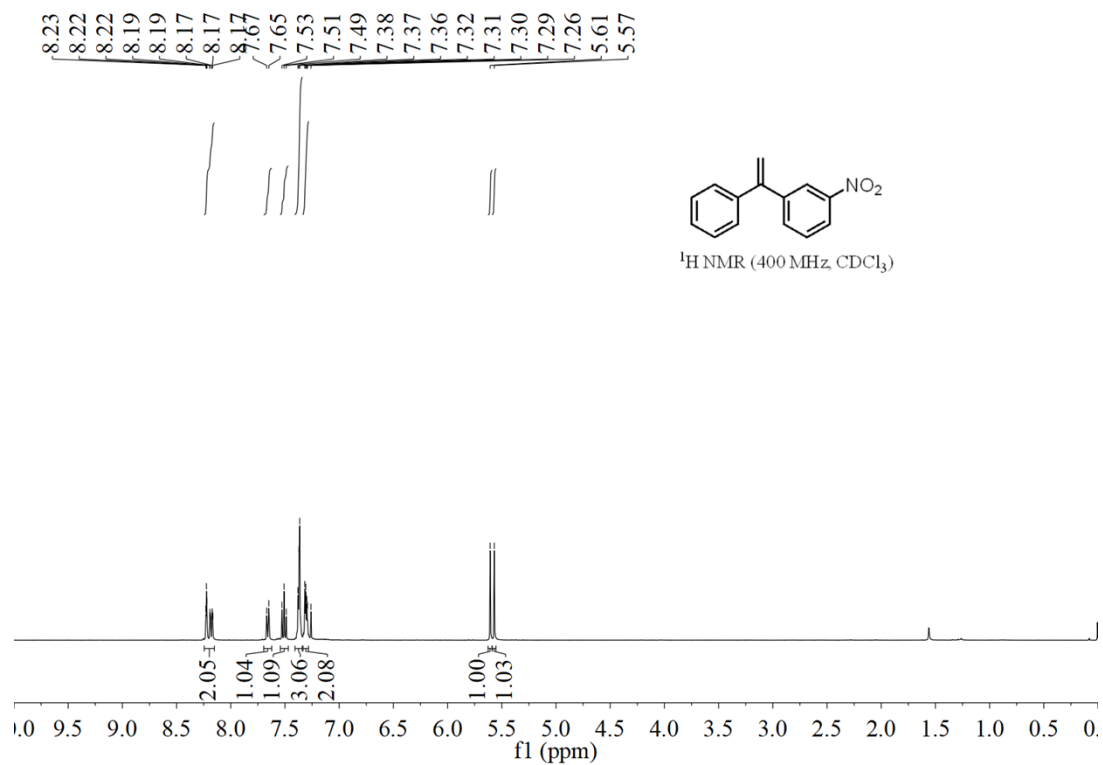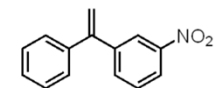

<sup>1</sup>H NMR (400 MHz, CDCl<sub>3</sub>)

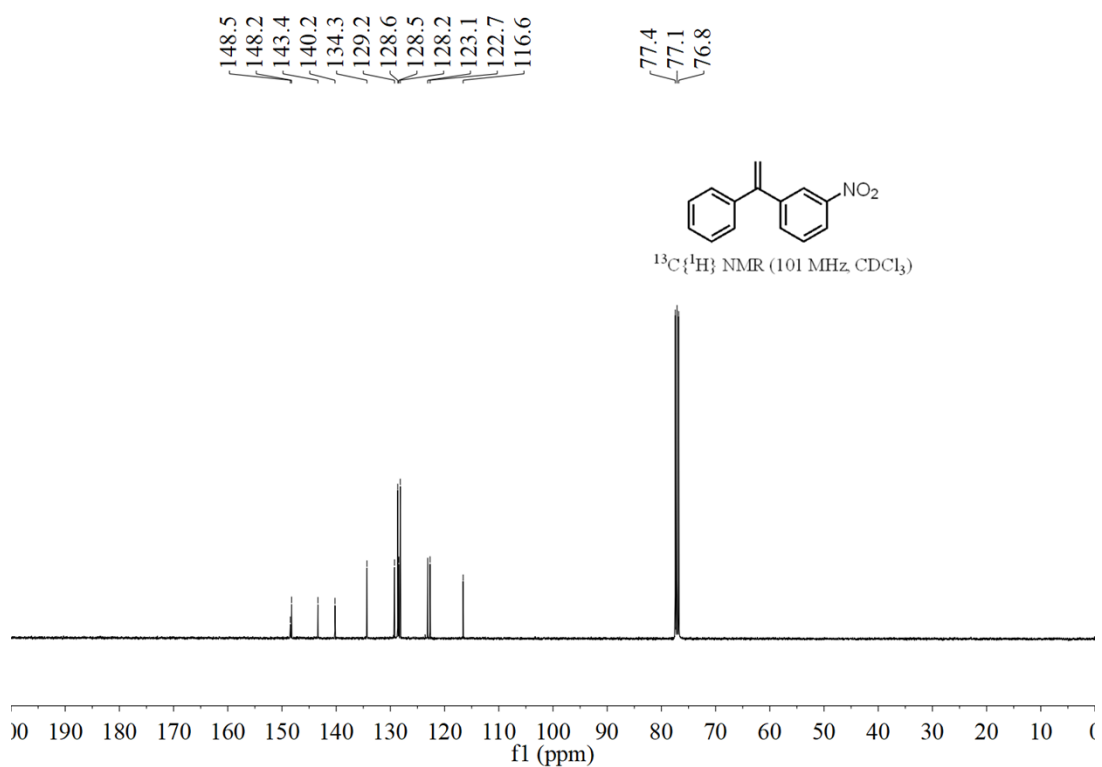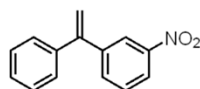

<sup>13</sup>C{<sup>1</sup>H} NMR (101 MHz, CDCl<sub>3</sub>)

**Buta-1,3-diene-2,3-diylidibenzene (24)**

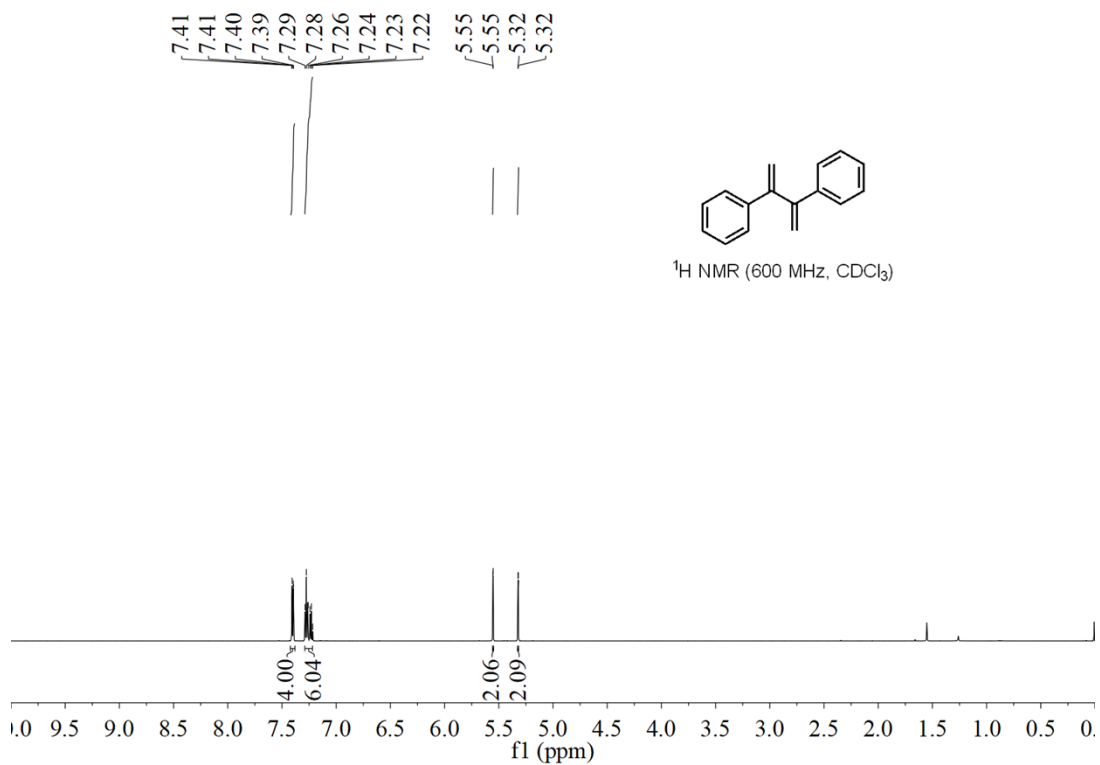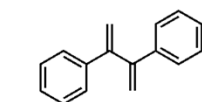

<sup>1</sup>H NMR (600 MHz, CDCl<sub>3</sub>)

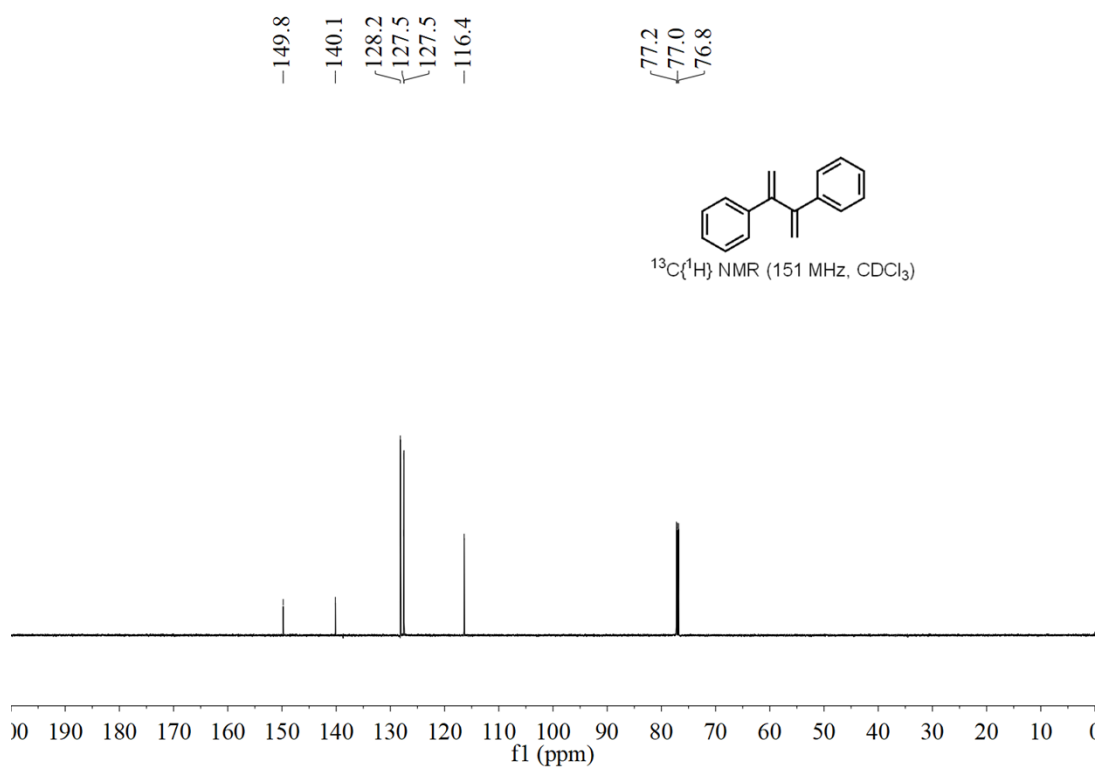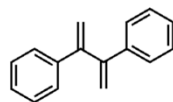

<sup>13</sup>C{<sup>1</sup>H} NMR (151 MHz, CDCl<sub>3</sub>)

**1-Methyl-3-(1-(4-(trifluoromethoxy)phenyl)vinyl)benzene (27)**

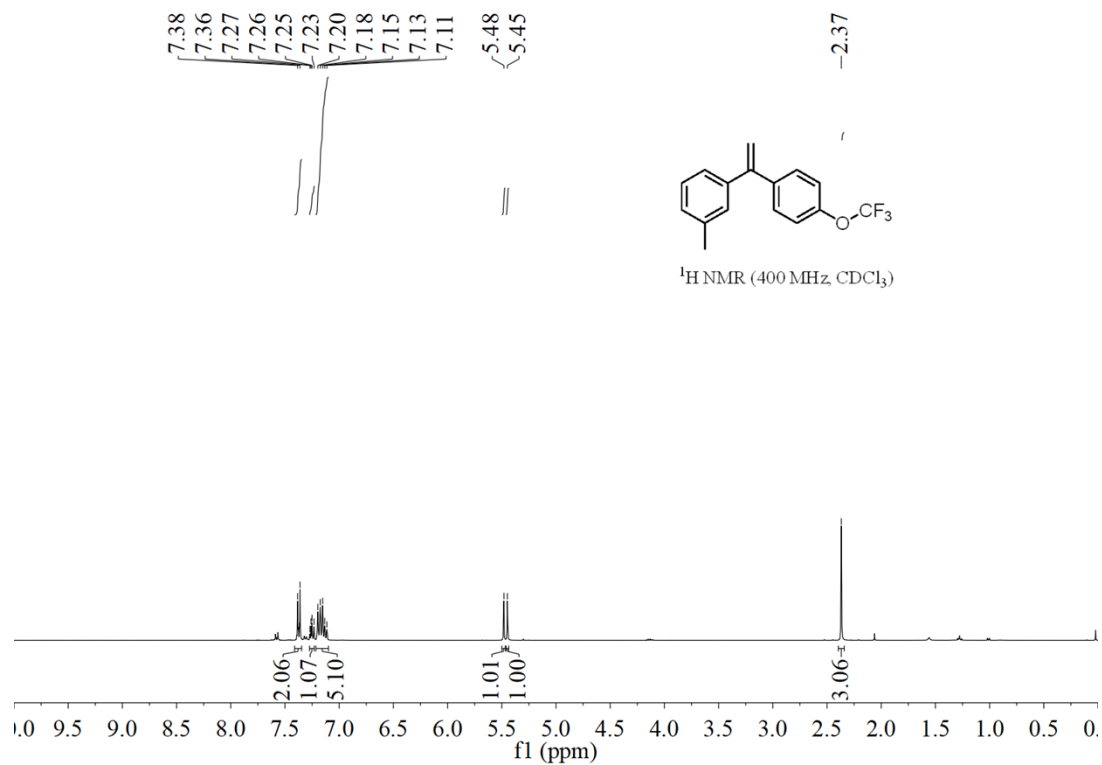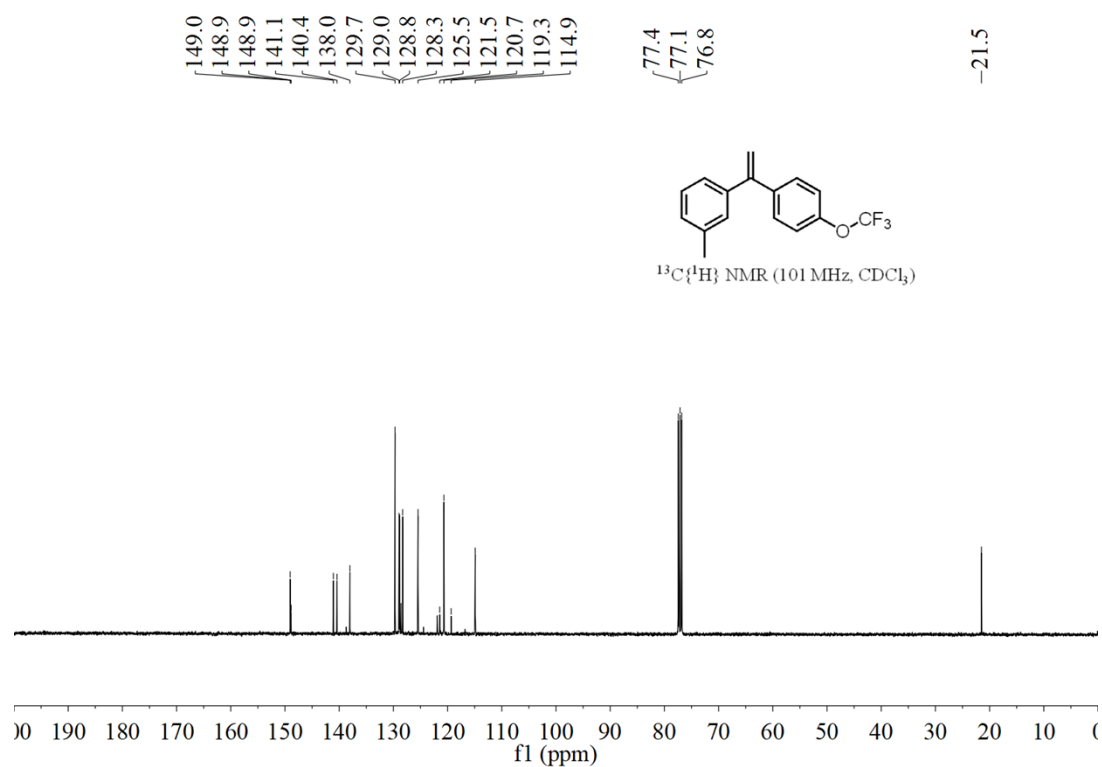

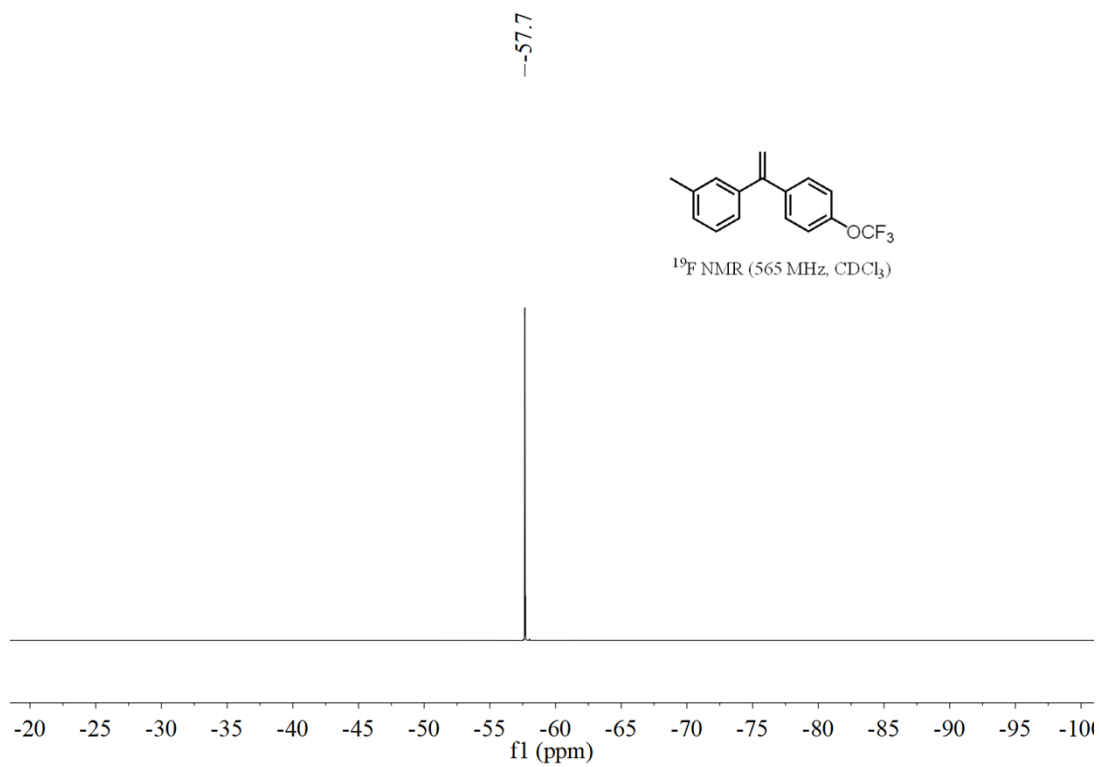

**2-(1-(M-tolyl)vinyl)naphthalene (28)**

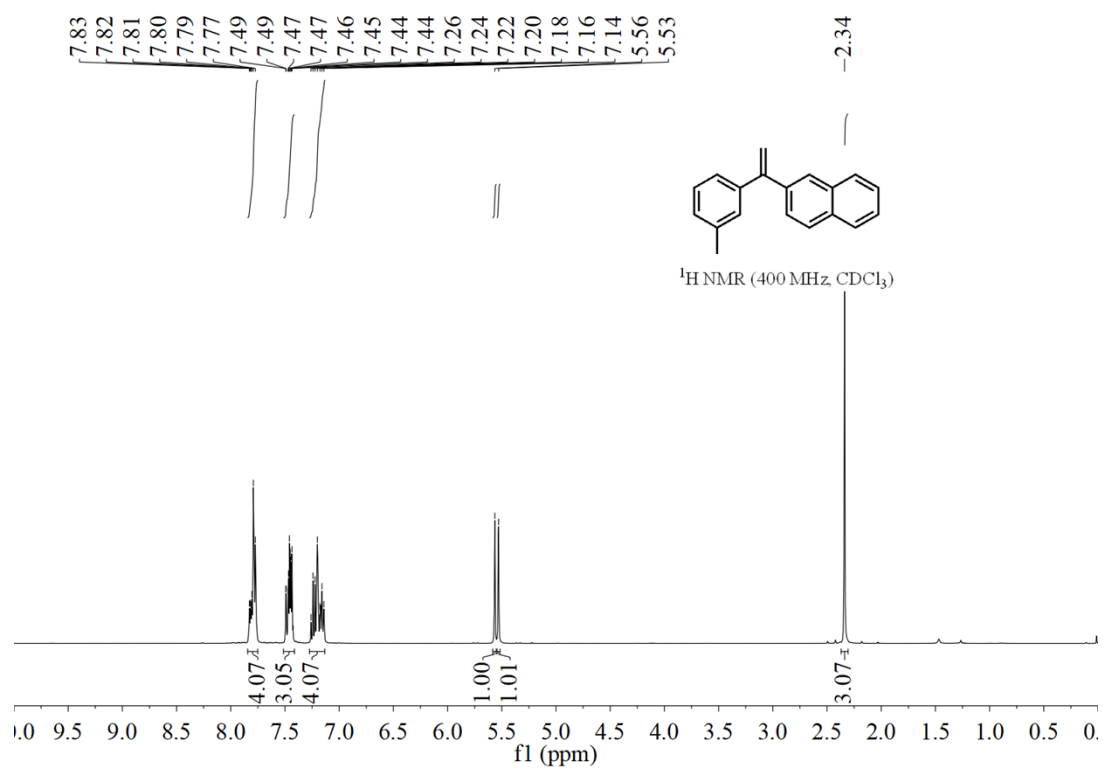

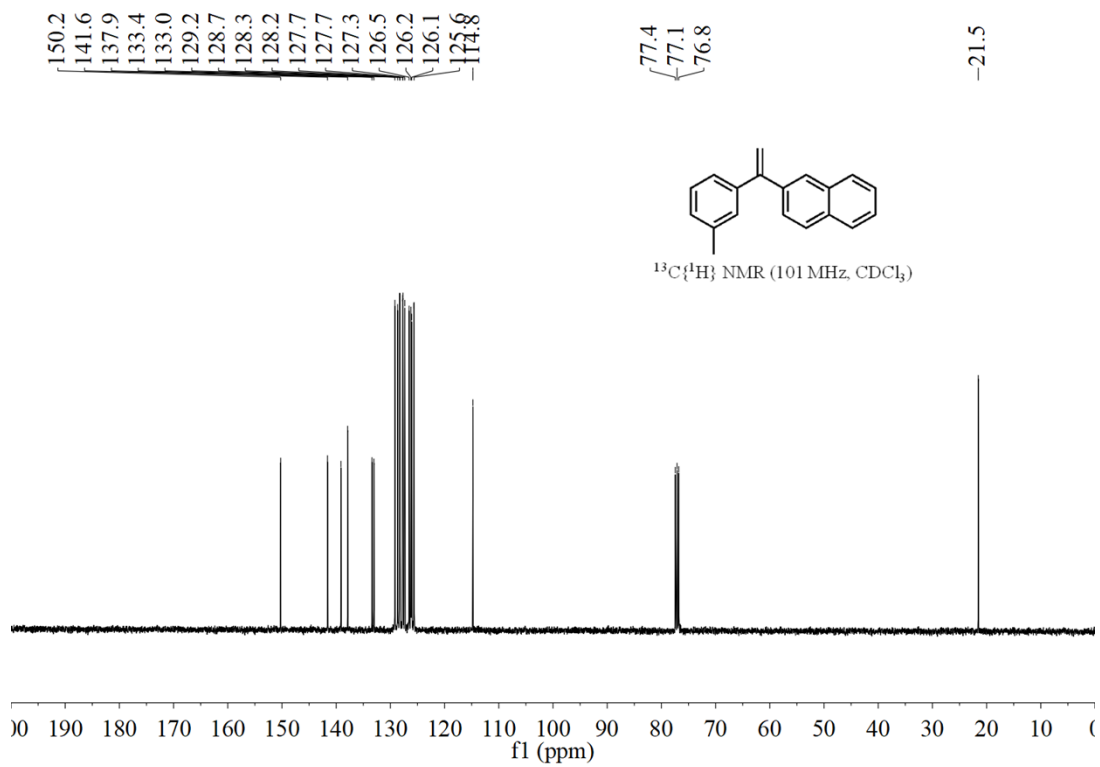

**1-Methoxy-4-(1-(*p*-tolyl)vinyl)benzene (29)**

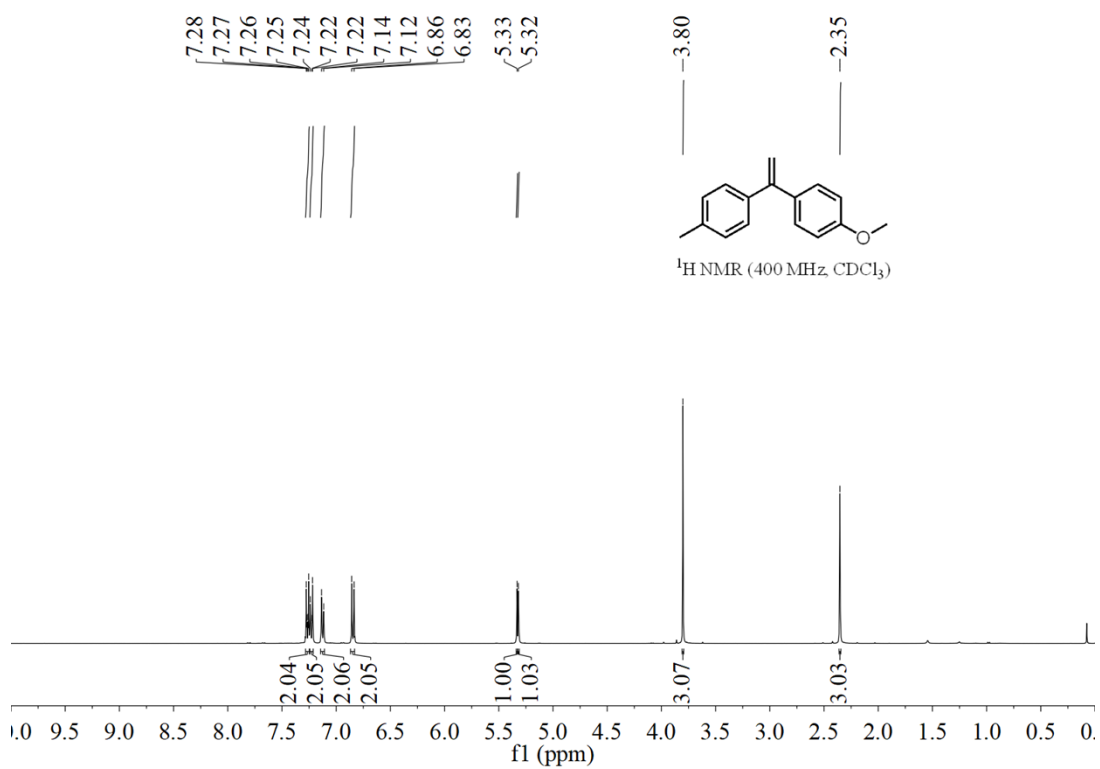



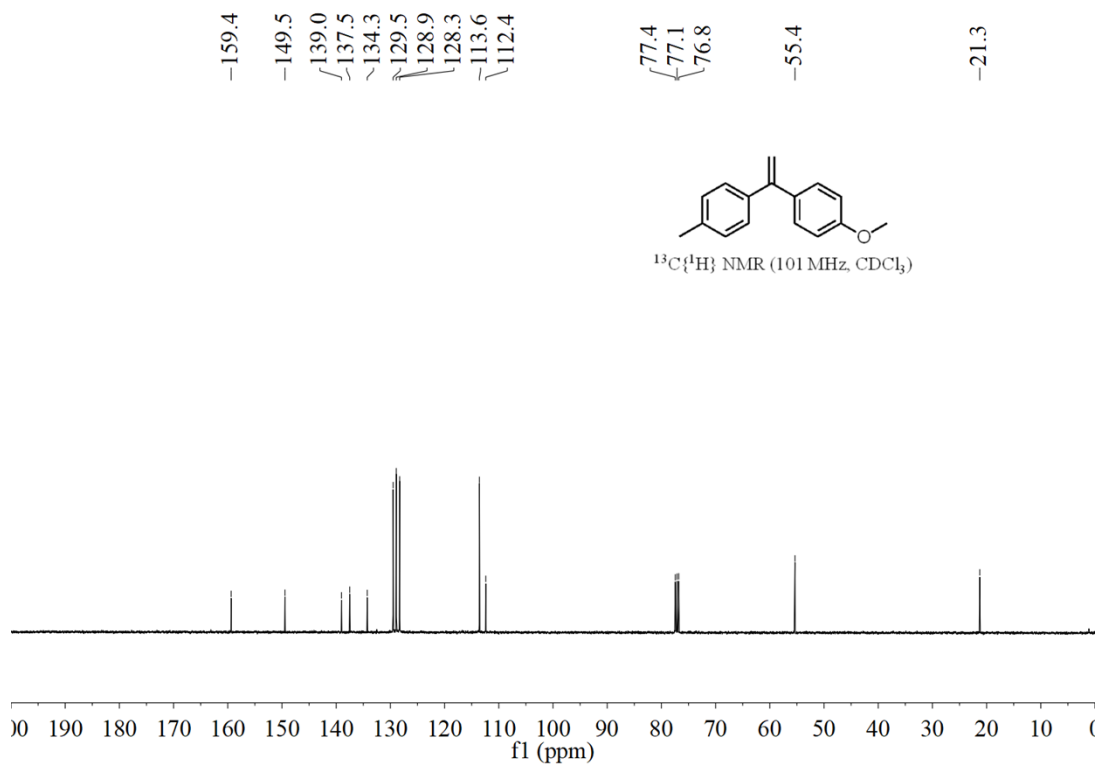

**Trimethyl(4-(1-(*p*-tolyl)vinyl)phenyl)silane (30)**

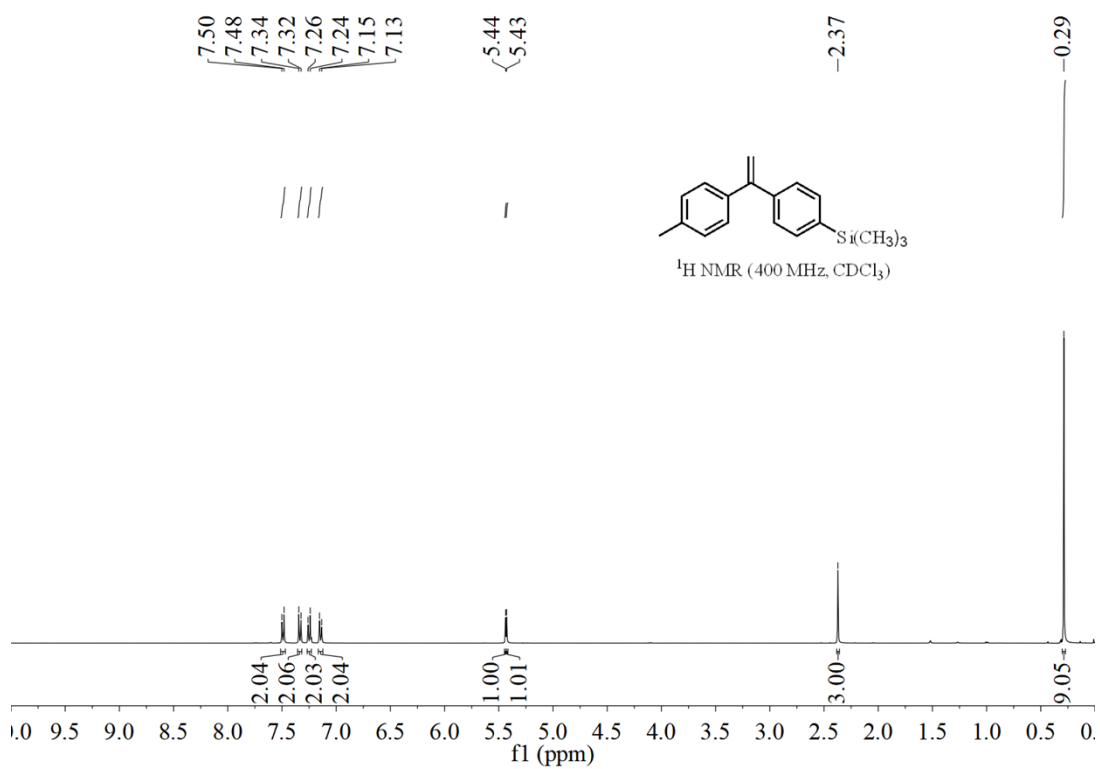

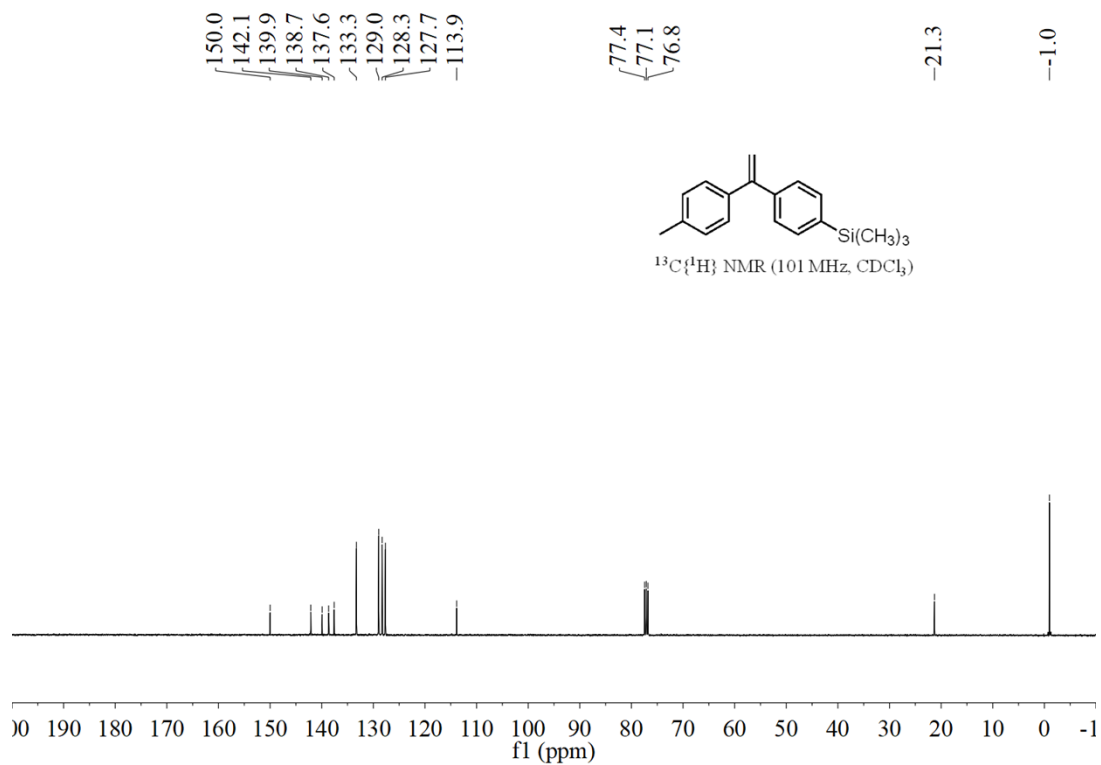

**1-Chloro-4-(1-(4-methoxyphenyl)vinyl)benzene (31)**

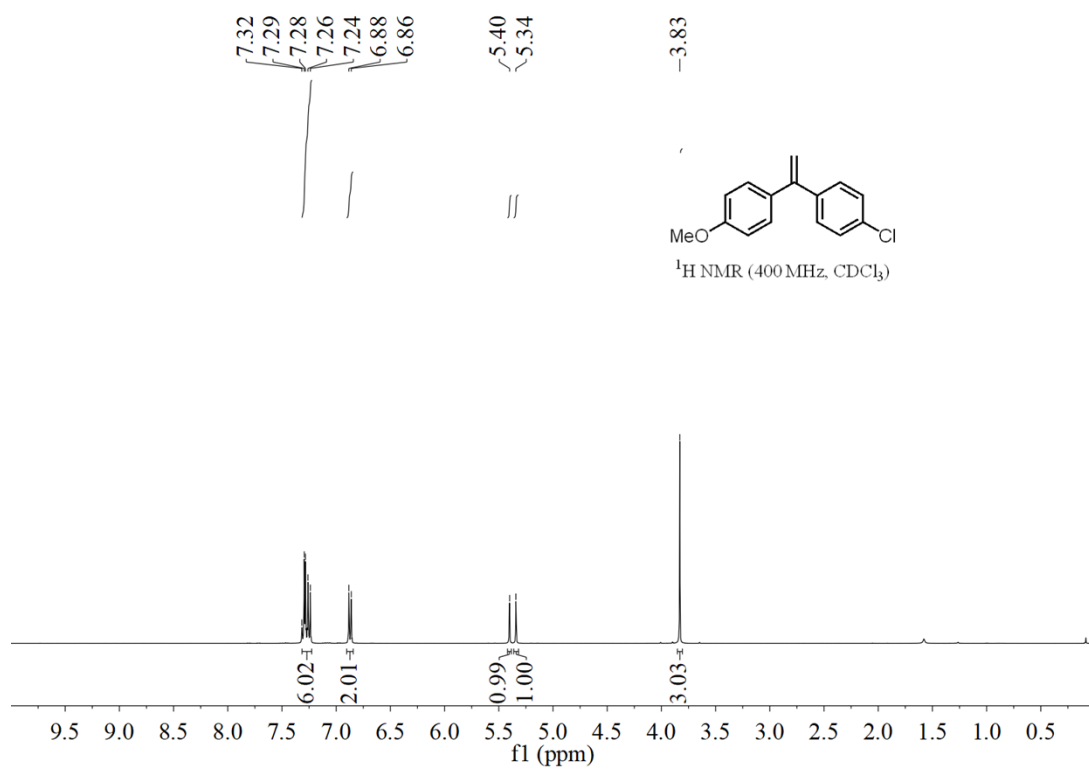

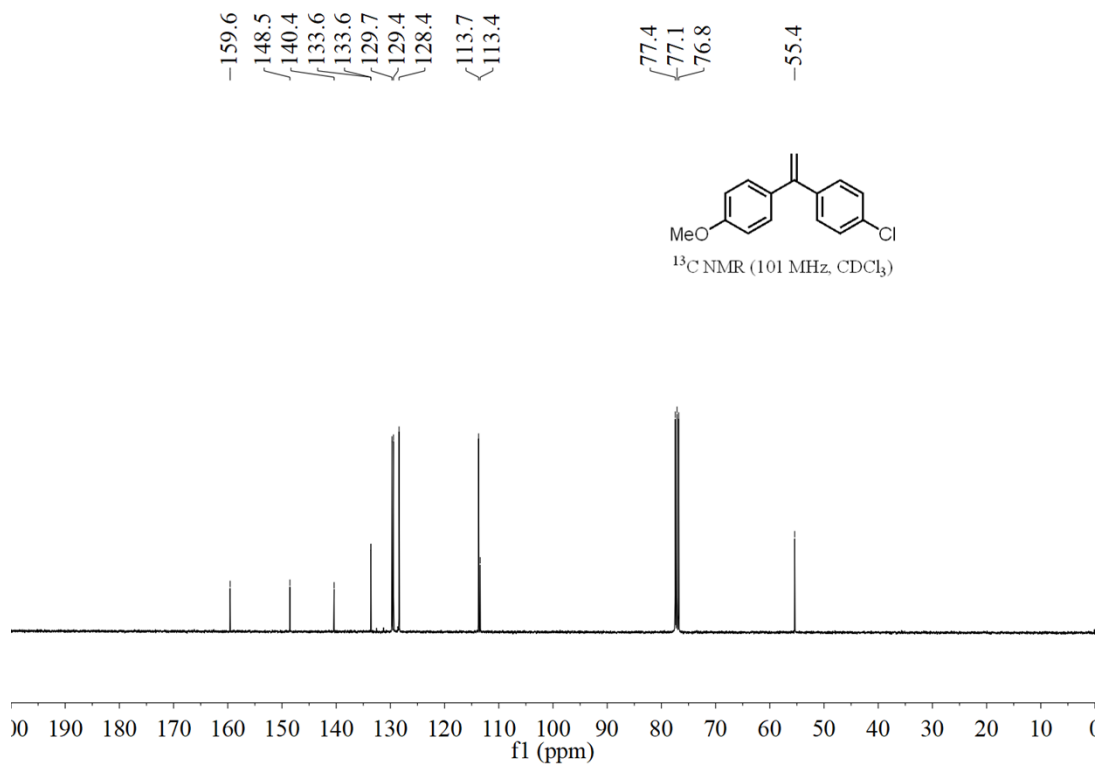

**3-(1-([1,1'-Biphenyl]-4-yl)vinyl)thiophene (32)**

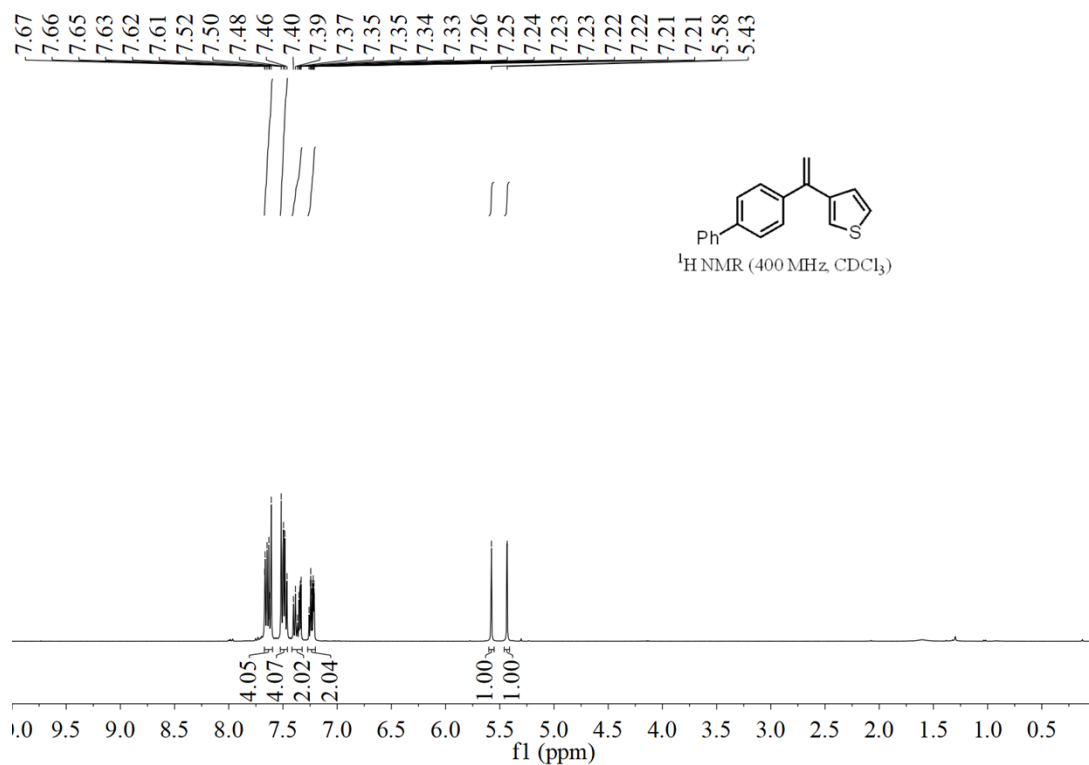

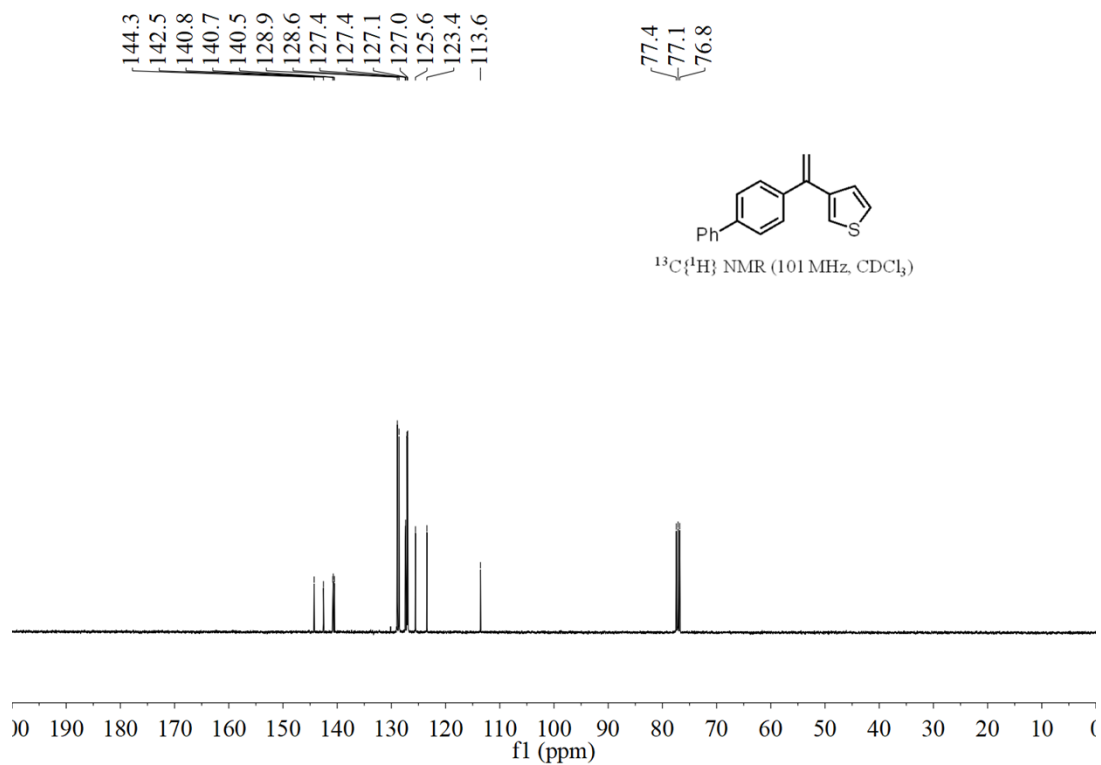

**4-(1-(2-Fluorophenyl)vinyl)-1,1'-biphenyl (33)**

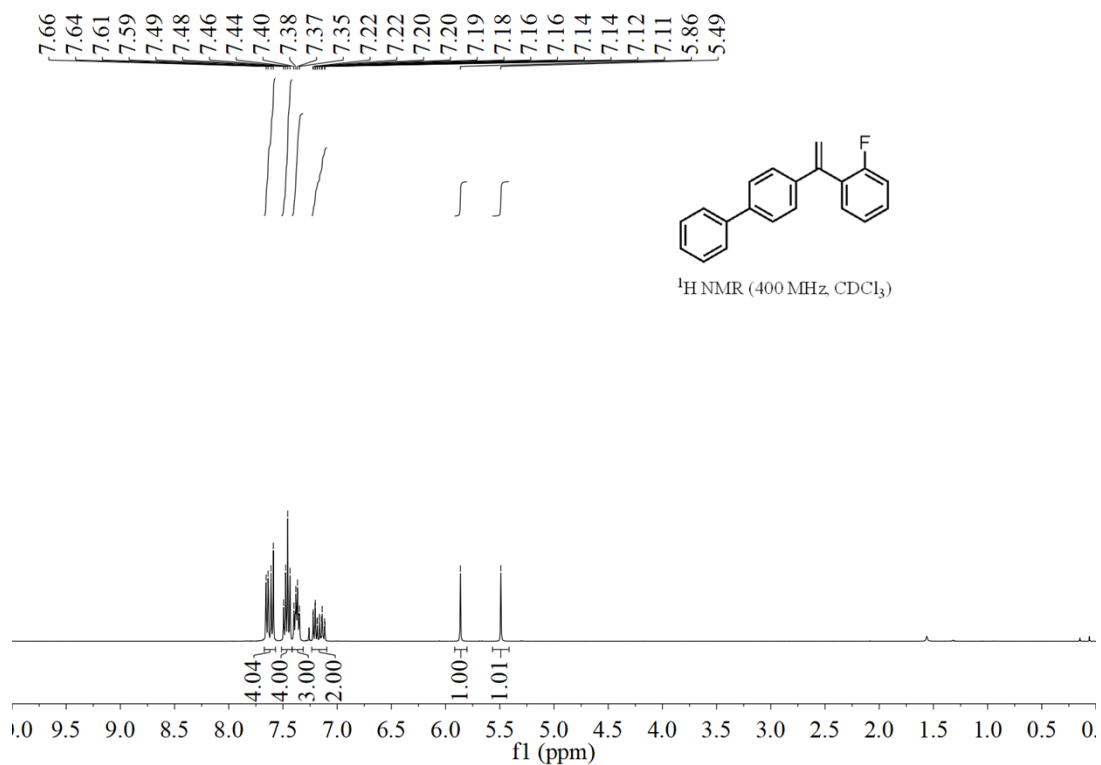

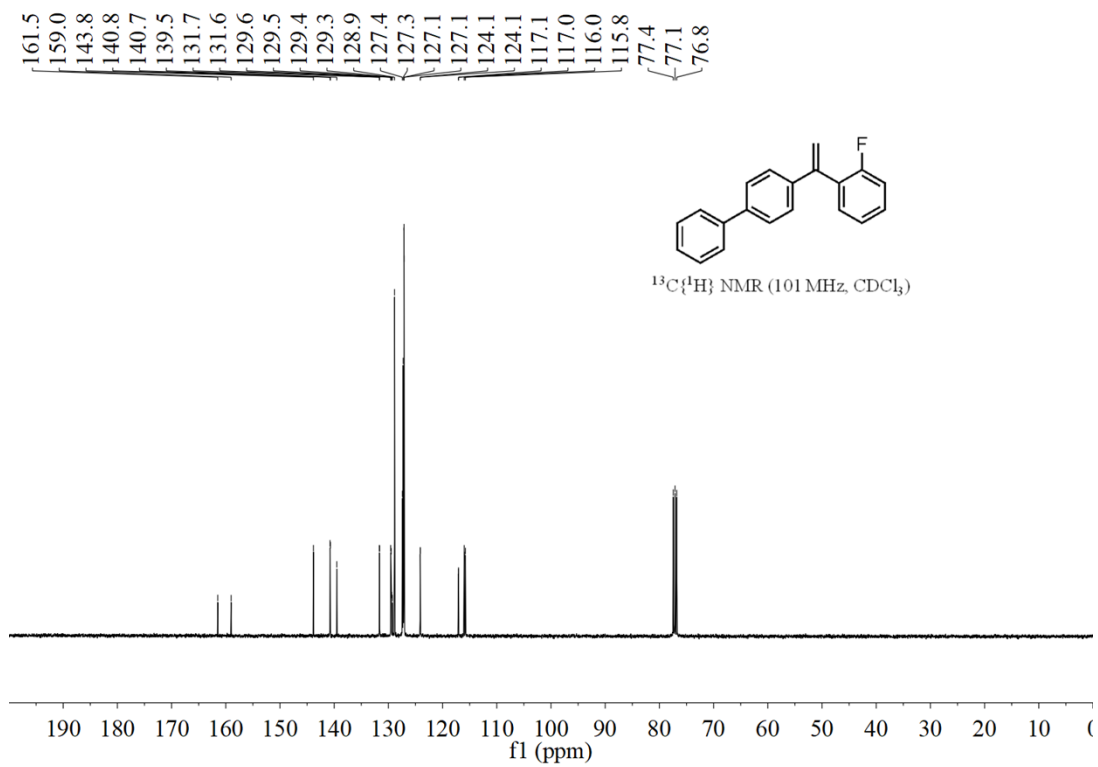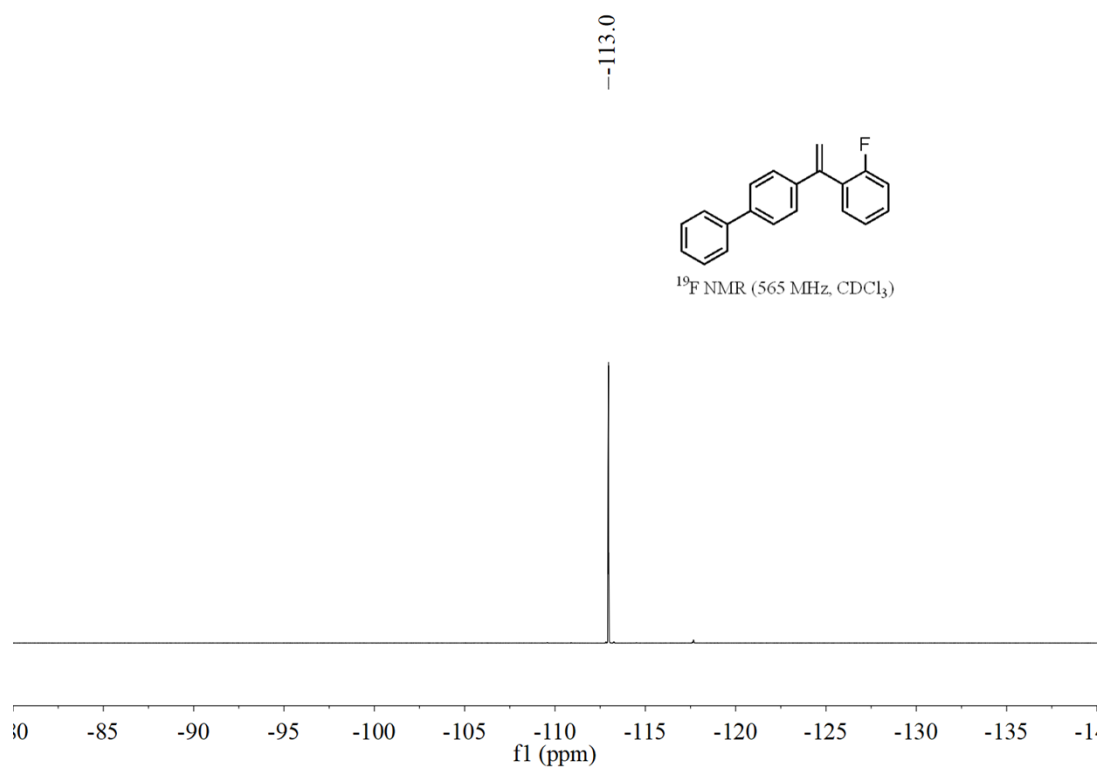

**5-(1-([1,1'-Biphenyl]-4-yl)vinyl)benzo[d][1,3]dioxole (34)**

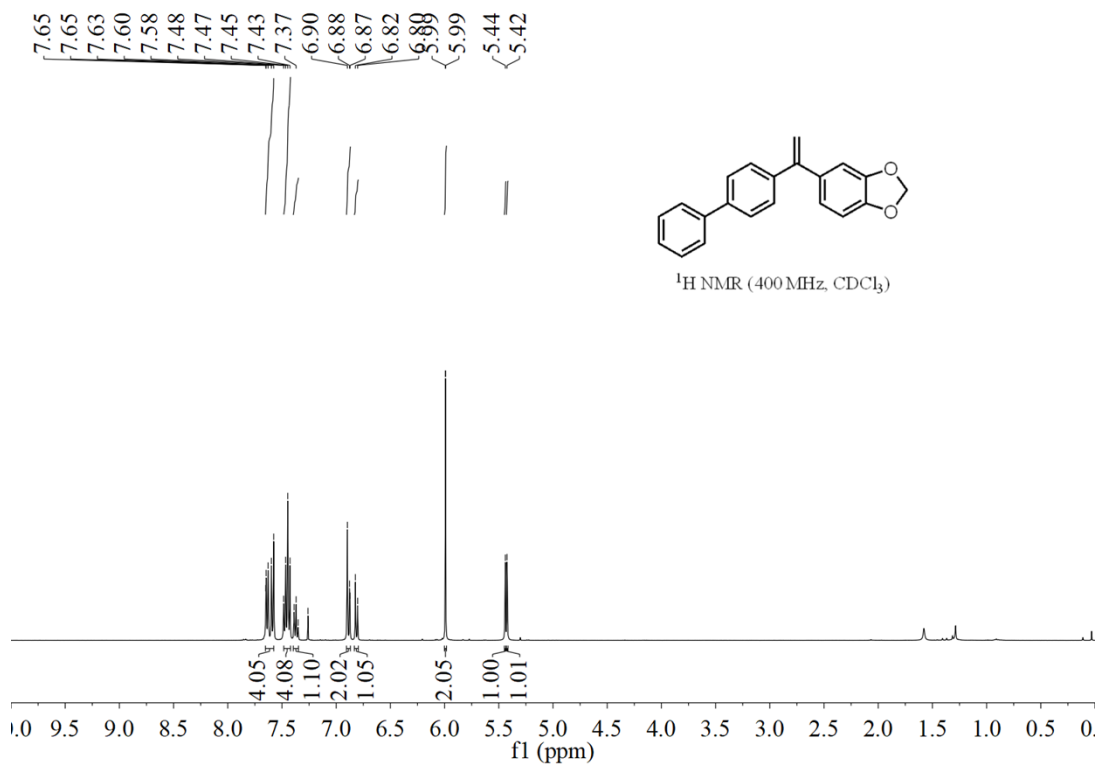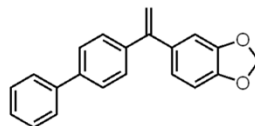

<sup>1</sup>H NMR (400 MHz, CDCl<sub>3</sub>)

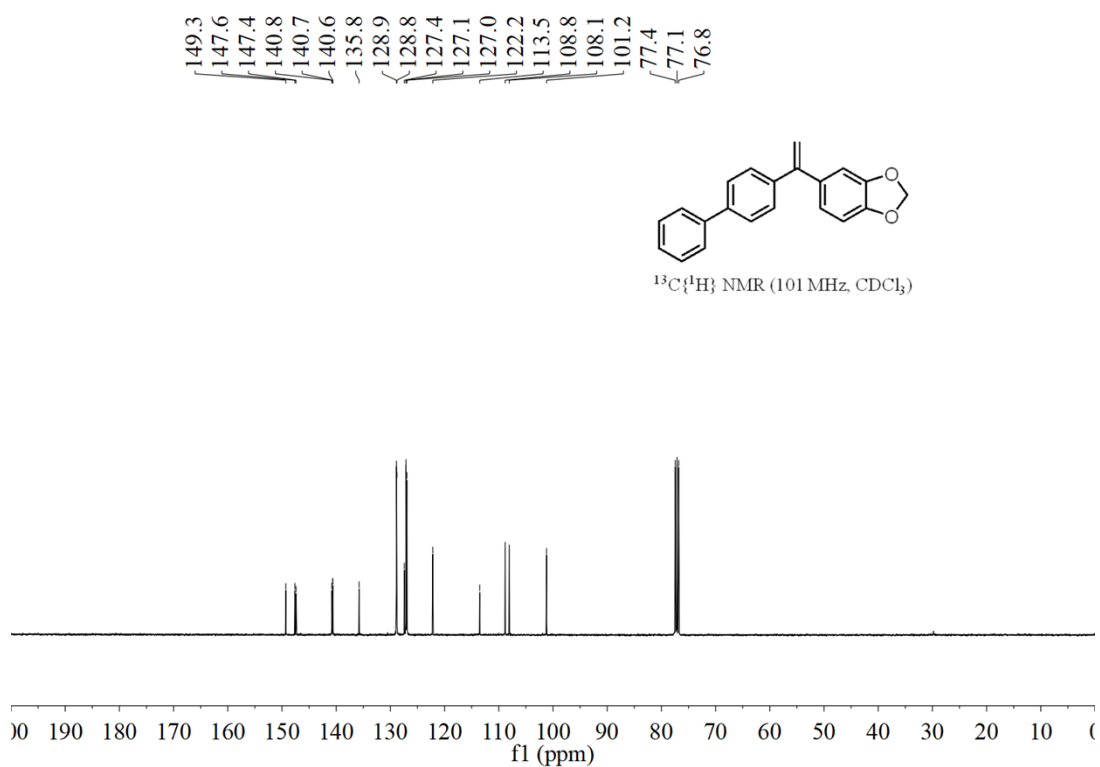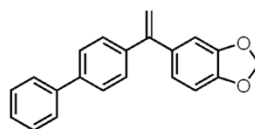

<sup>13</sup>C{<sup>1</sup>H} NMR (101 MHz, CDCl<sub>3</sub>)

**4,4'-(Ethene-1,1-diyl)bis(fluorobenzene) (35)**

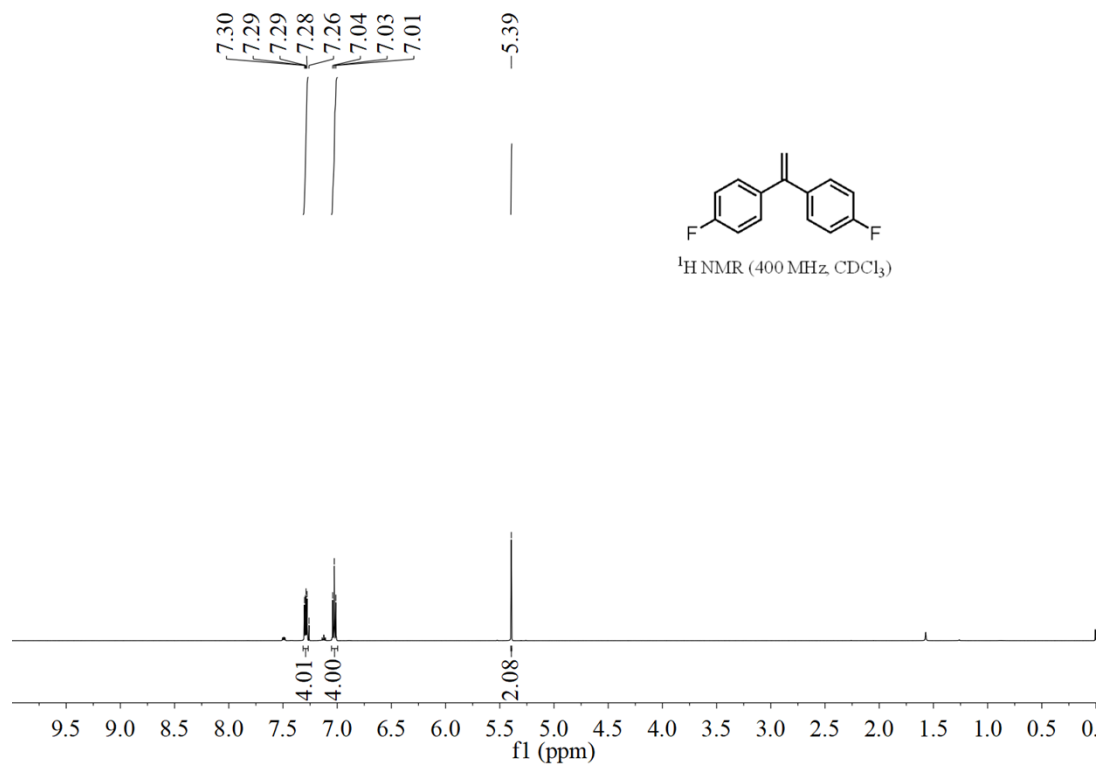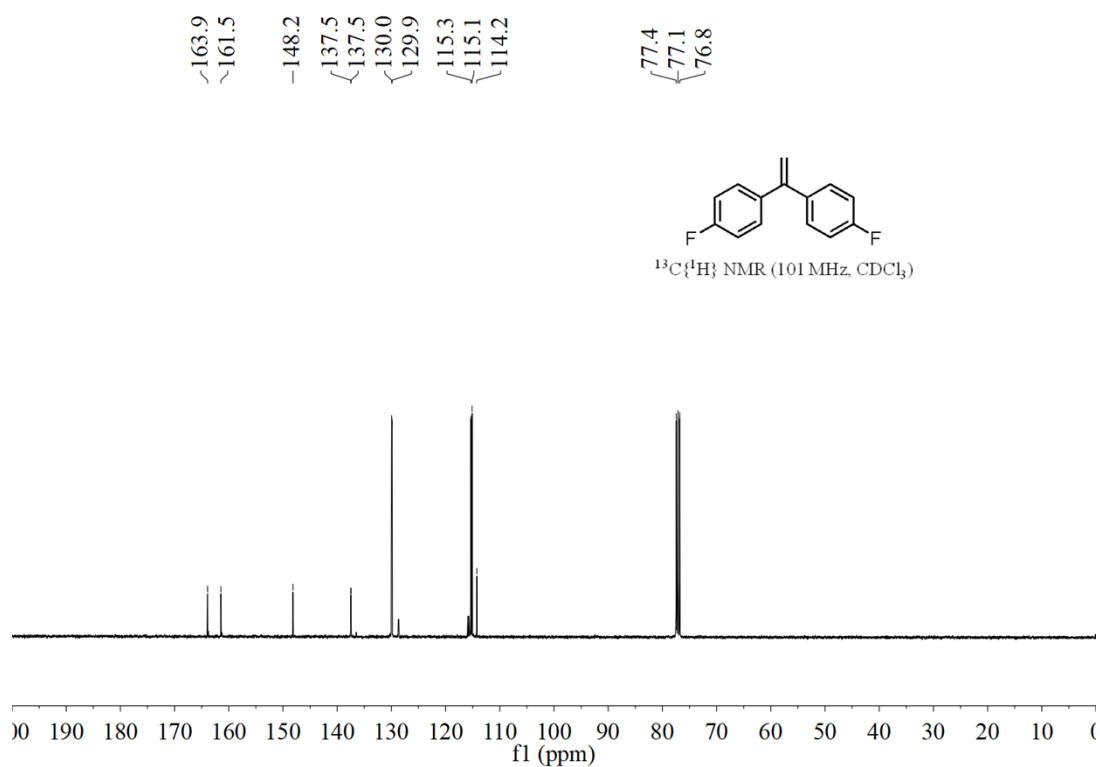

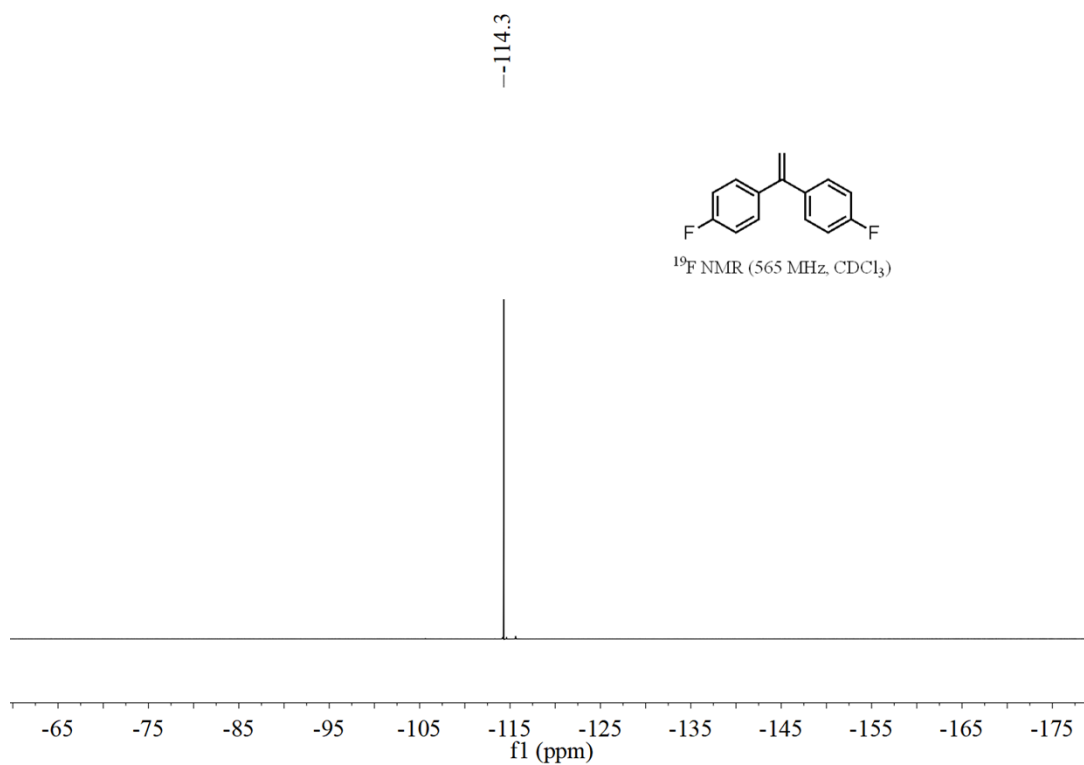

**1-Fluoro-4-(1-(4-vinylphenyl)vinyl)benzene (36)**

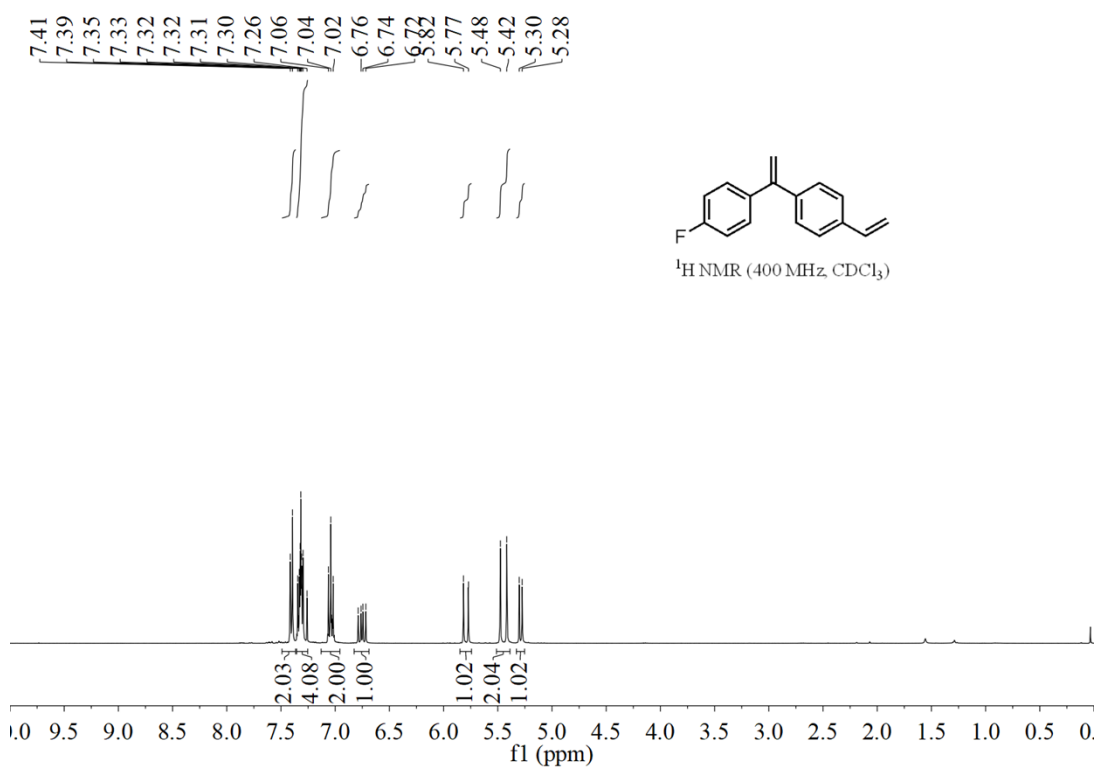



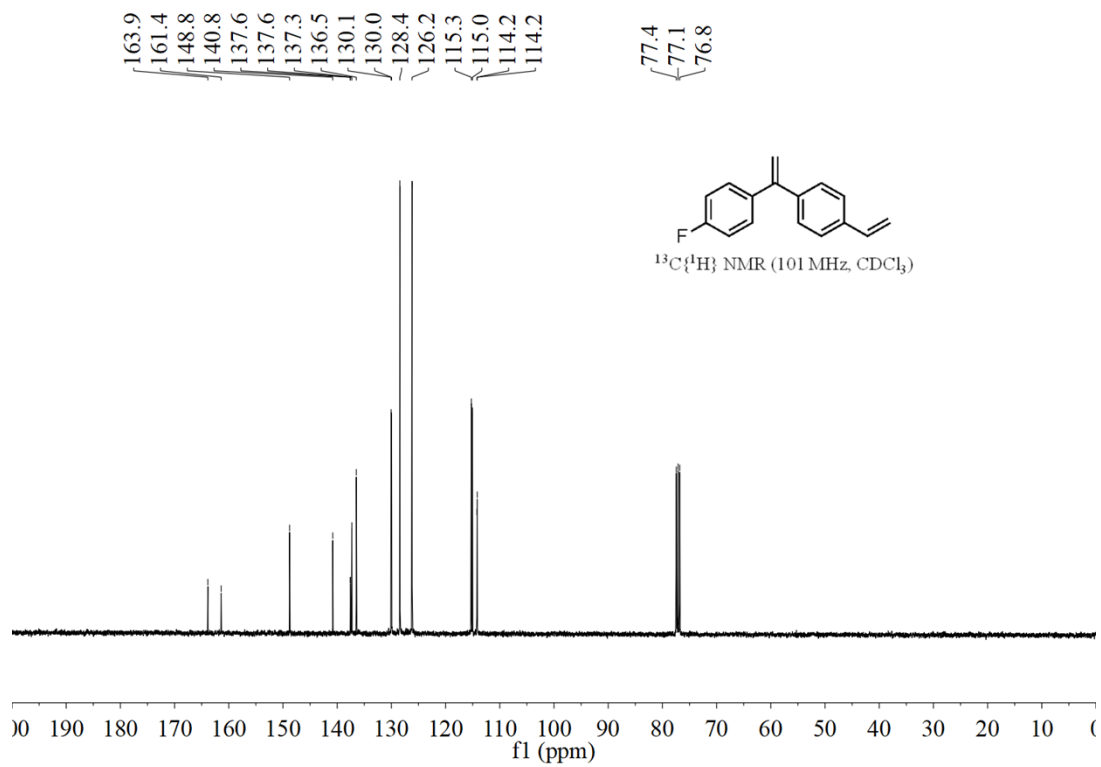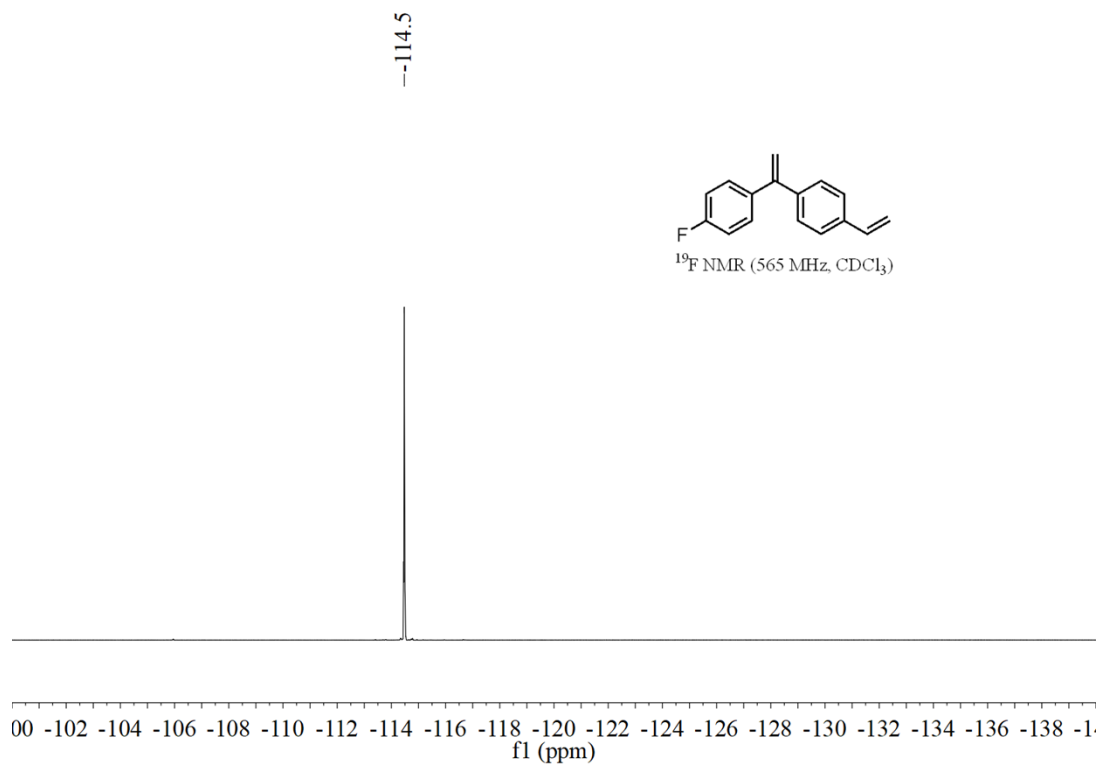

**1-Methyl-2-(1-(4-(trifluoromethyl)phenyl)vinyl)benzene (37)**

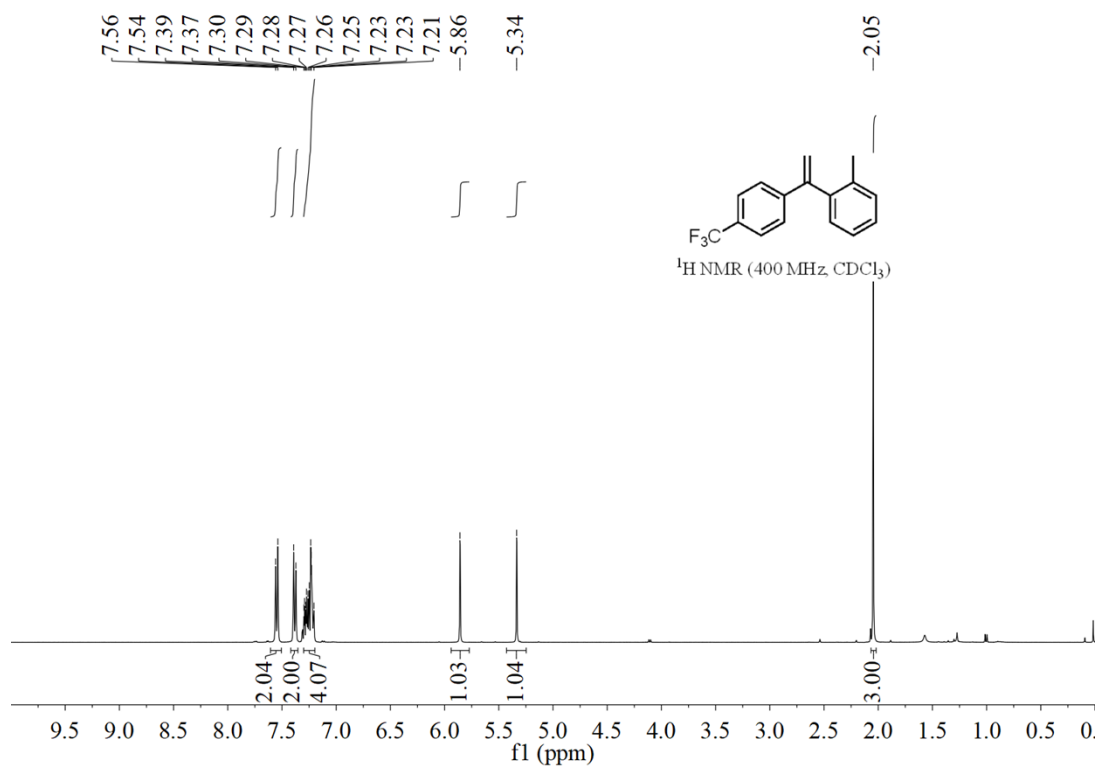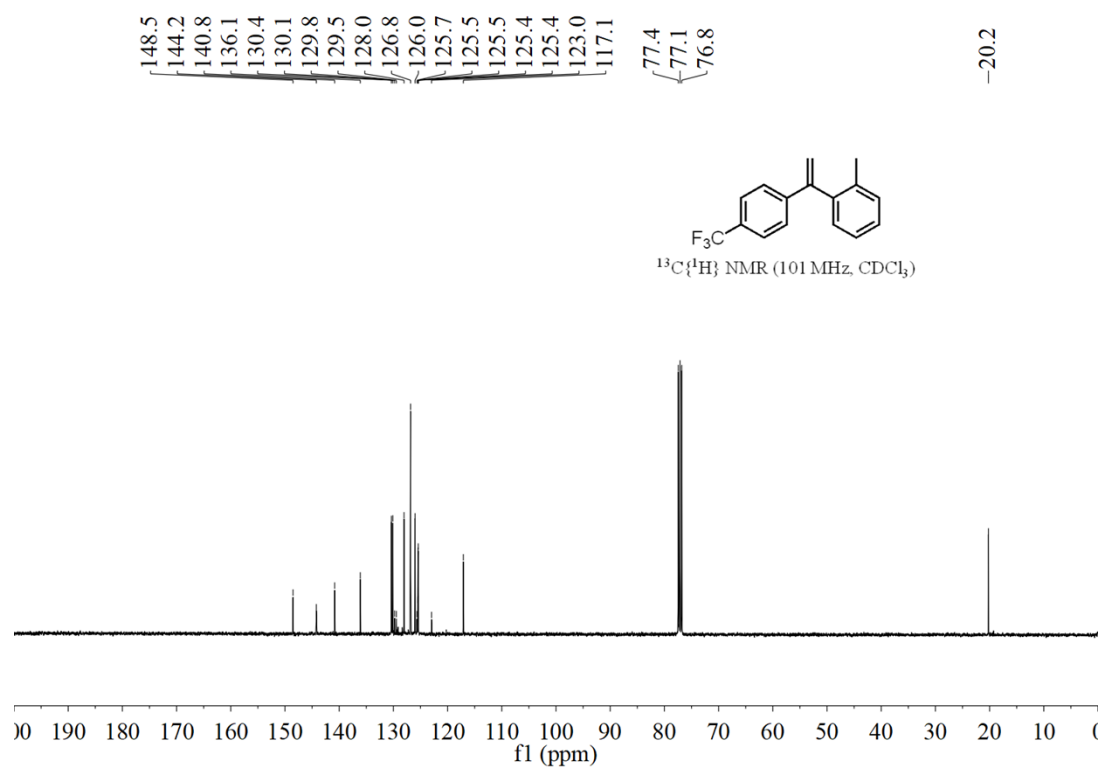

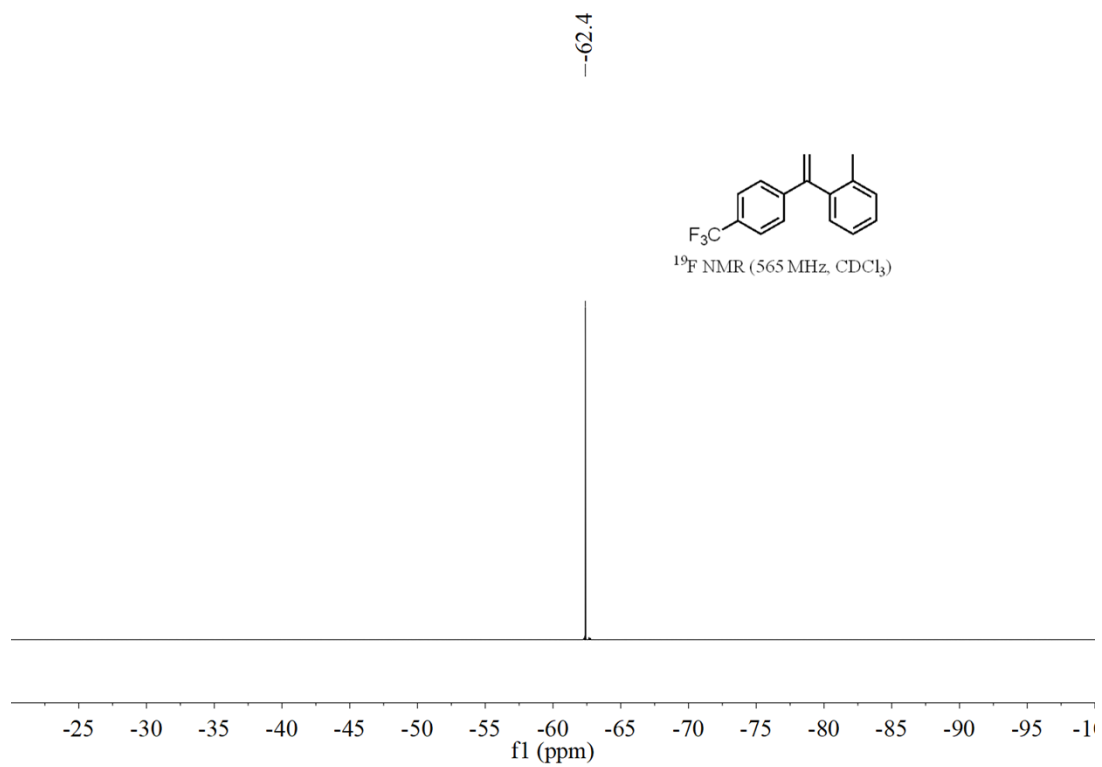

**1-(4-(1-(4-Chlorophenyl)vinyl)phenyl)ethan-1-one (38)**

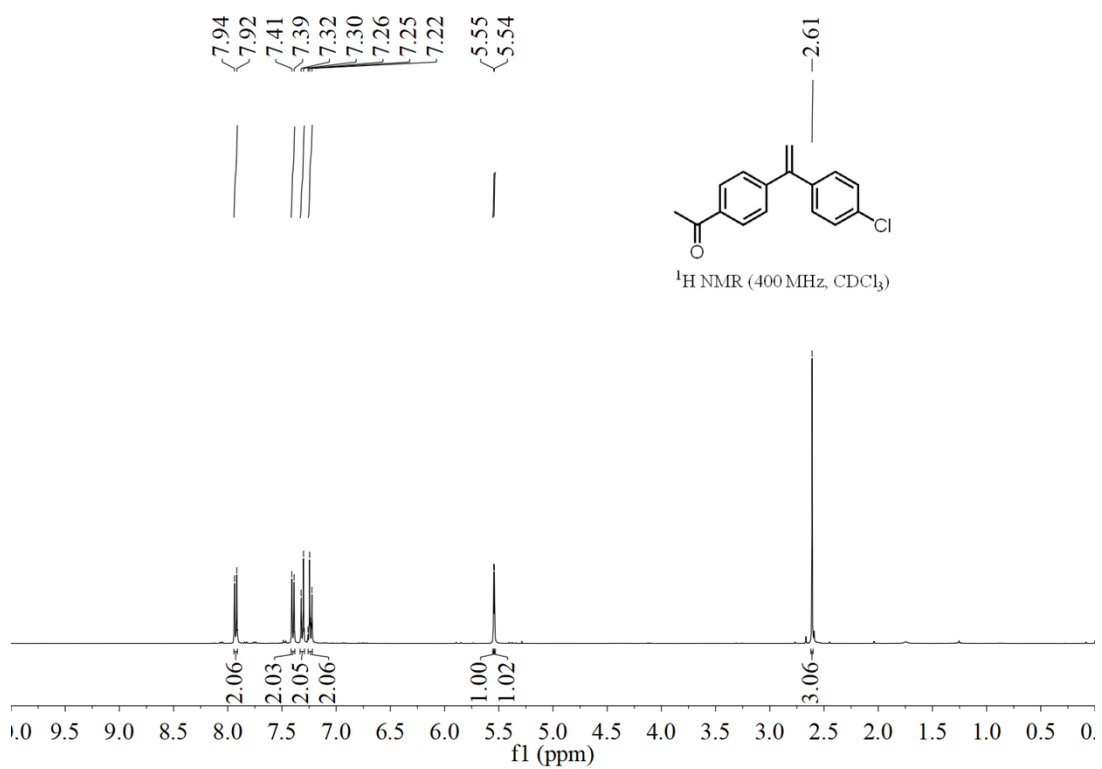

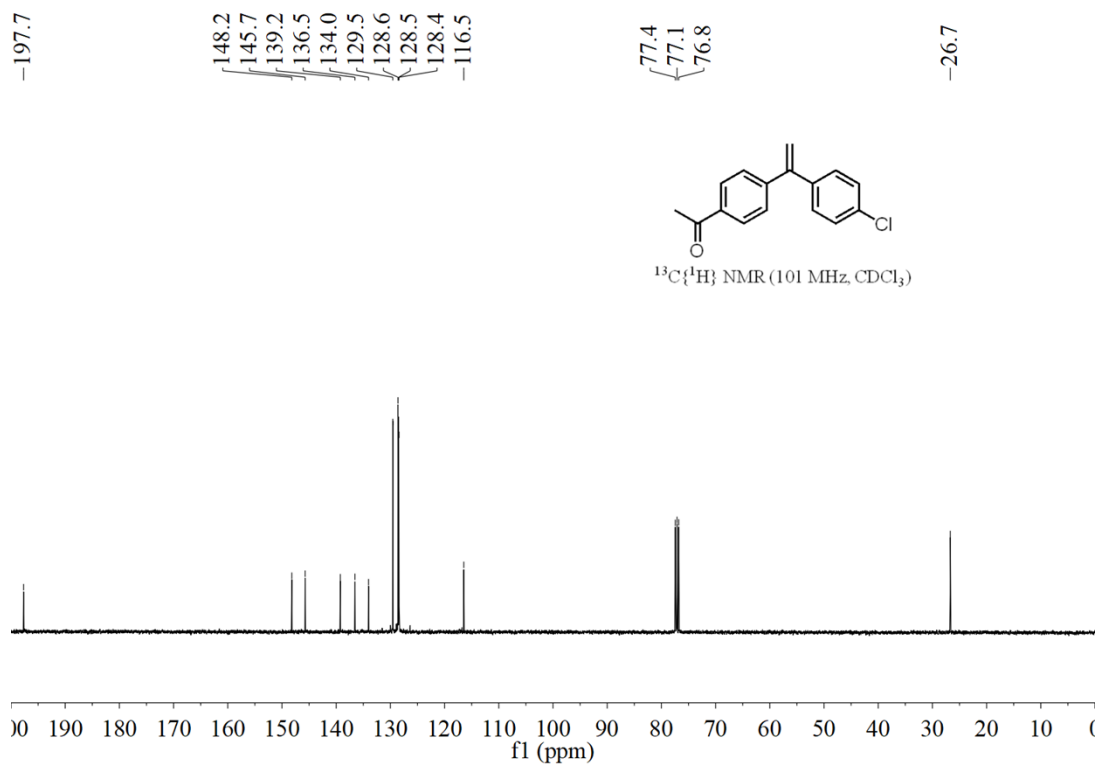

**Methyl 4-(1-(naphthalen-1-yl)vinyl)benzoate (39)**

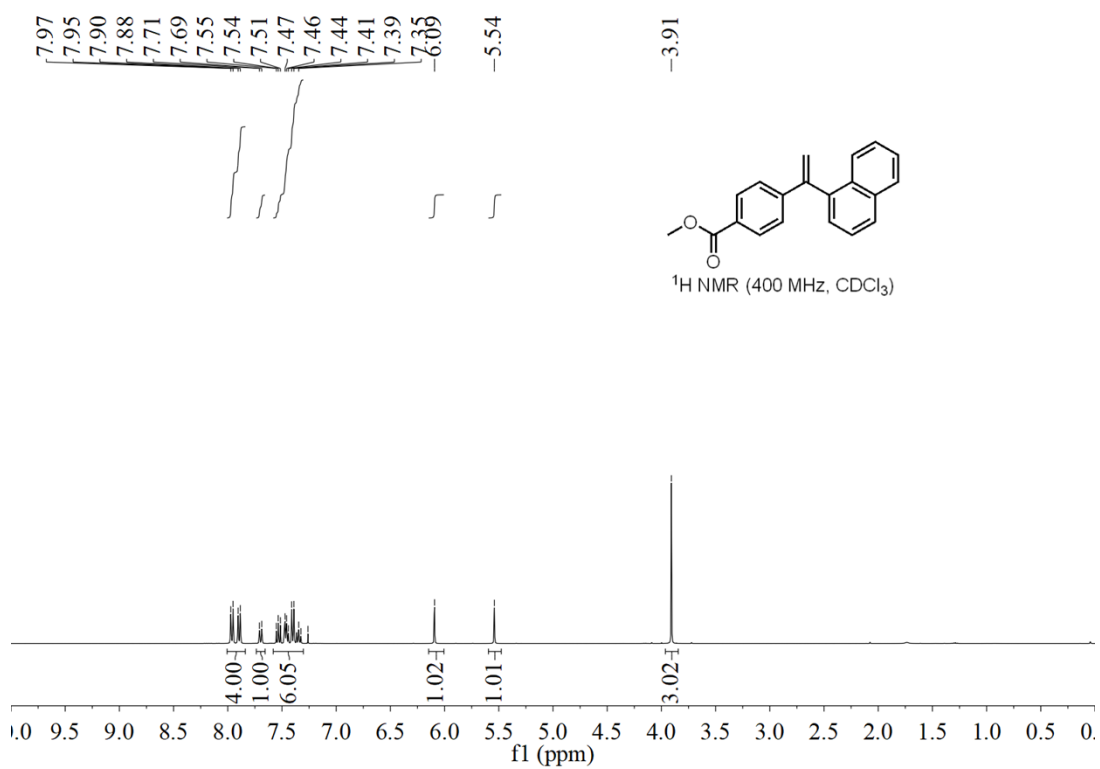

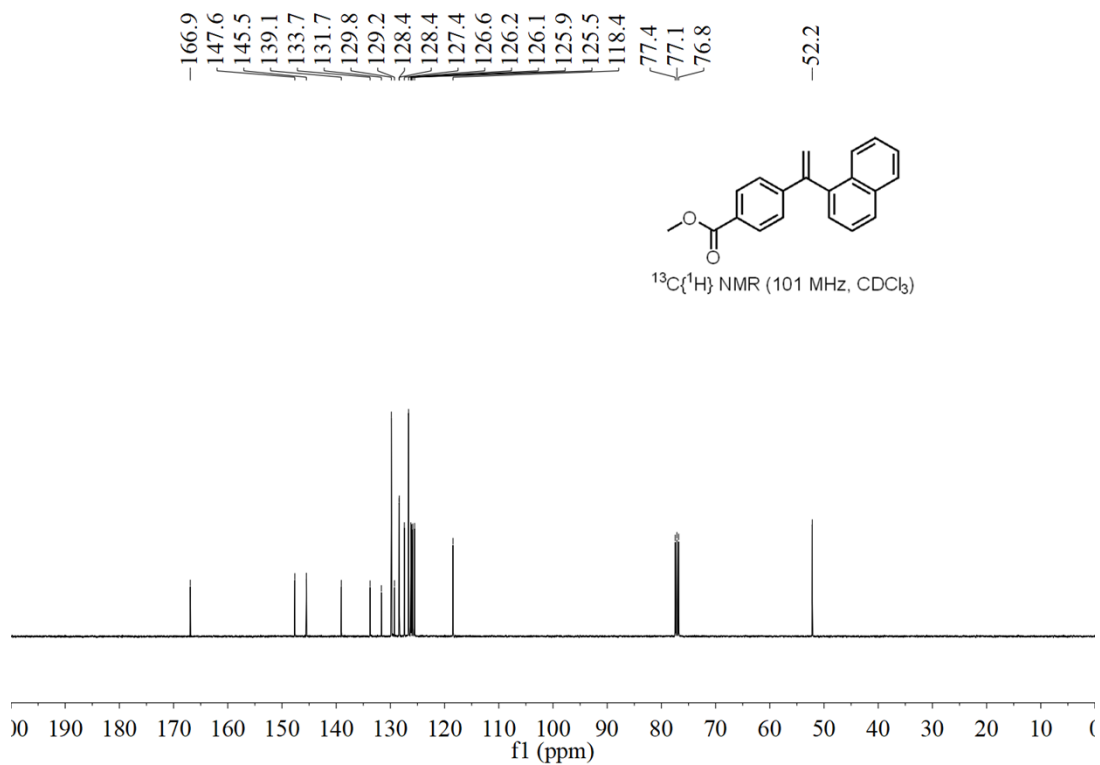

**4-(1-(4-Nitrophenyl)vinyl)-1,1'-biphenyl (40)**

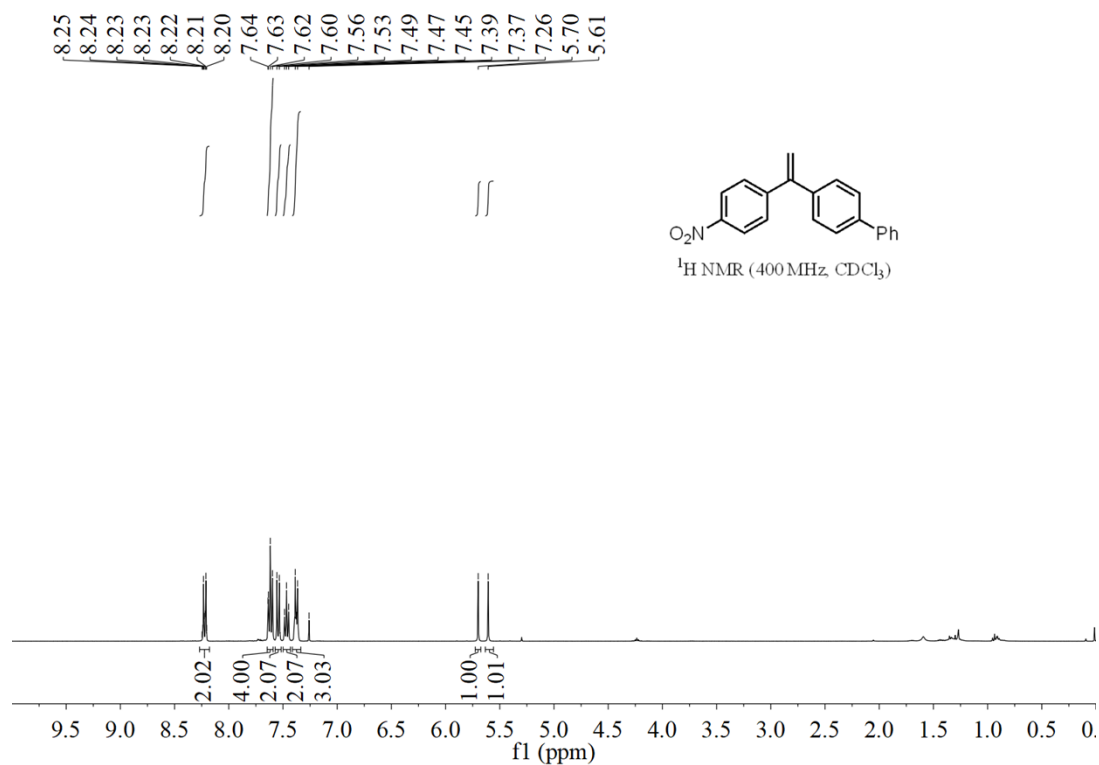

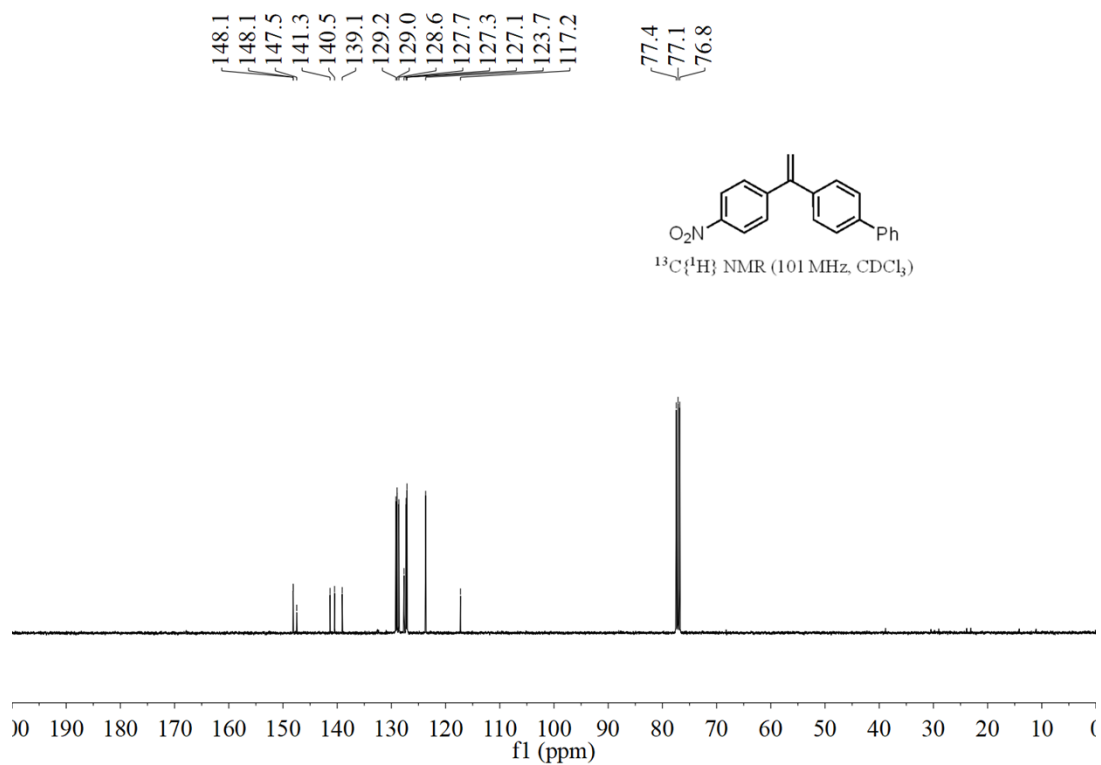

**4-(Oct-1-en-2-yl)-1,1'-biphenyl (41)**

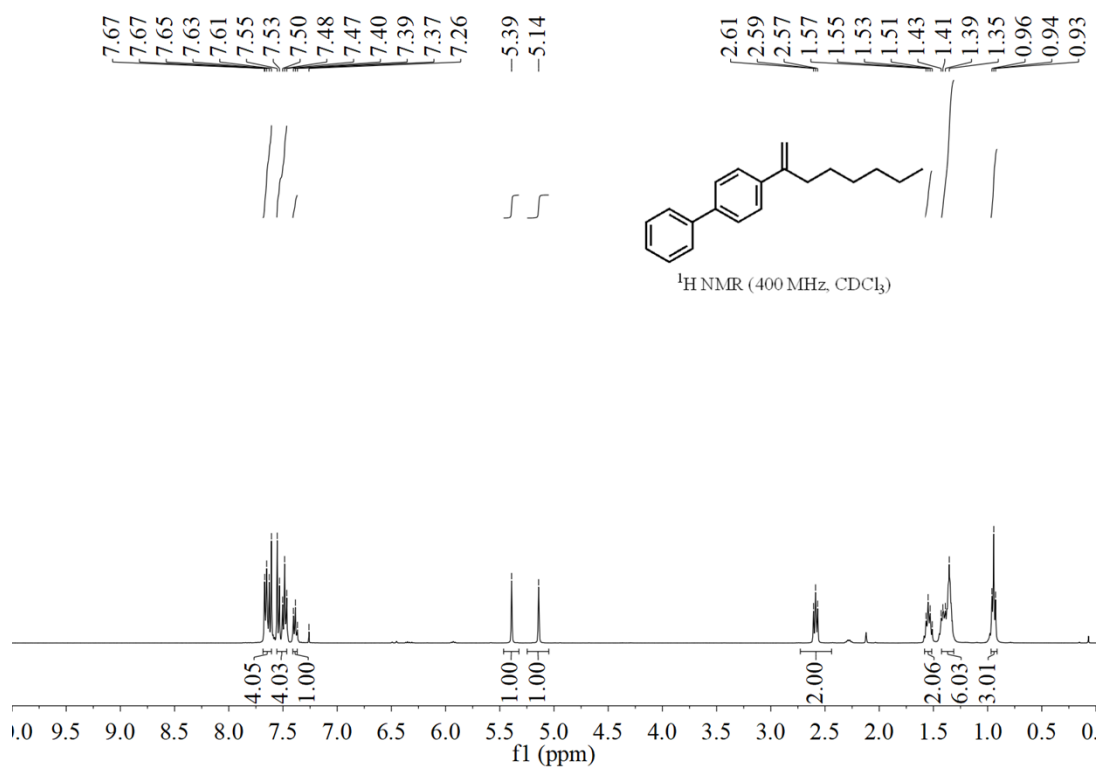

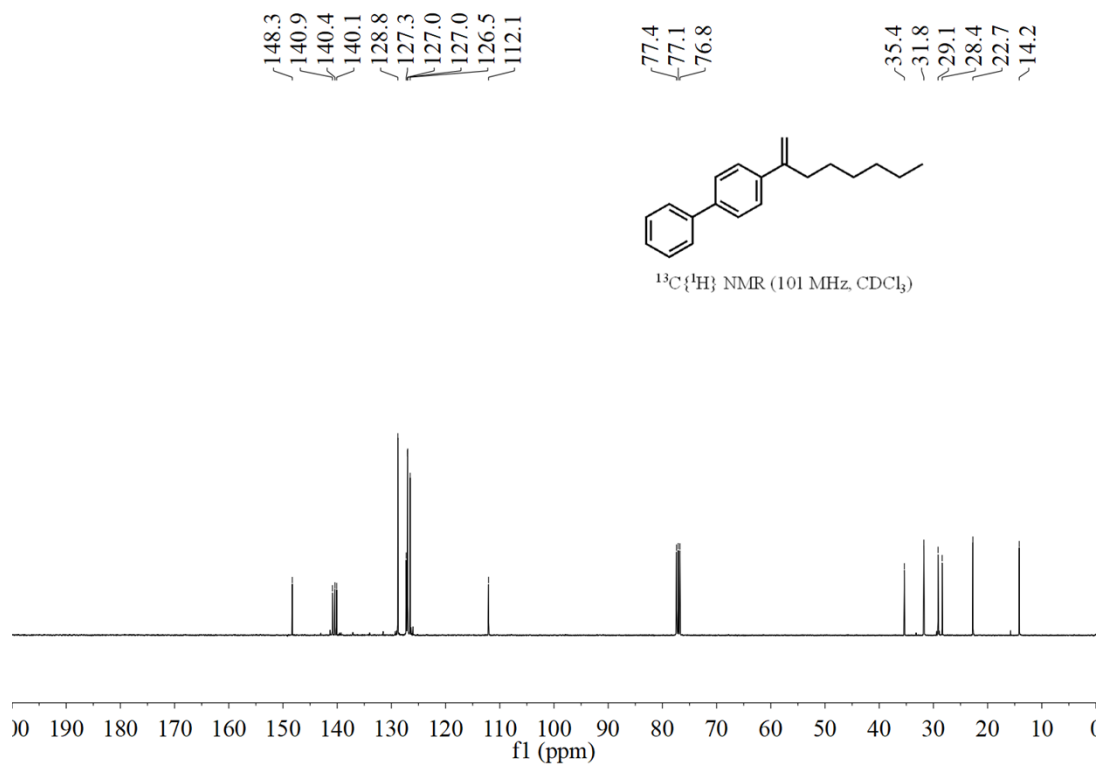

**4-(1-Cyclopropylvinyl)-1,1'-biphenyl (42)**

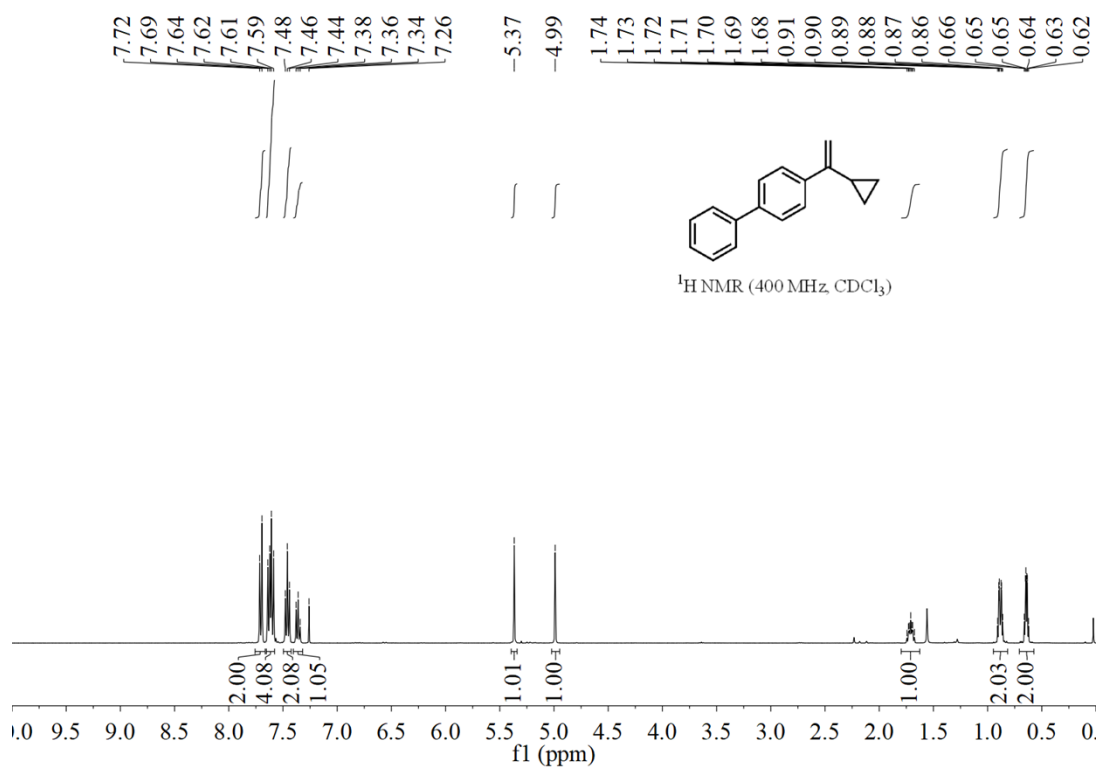

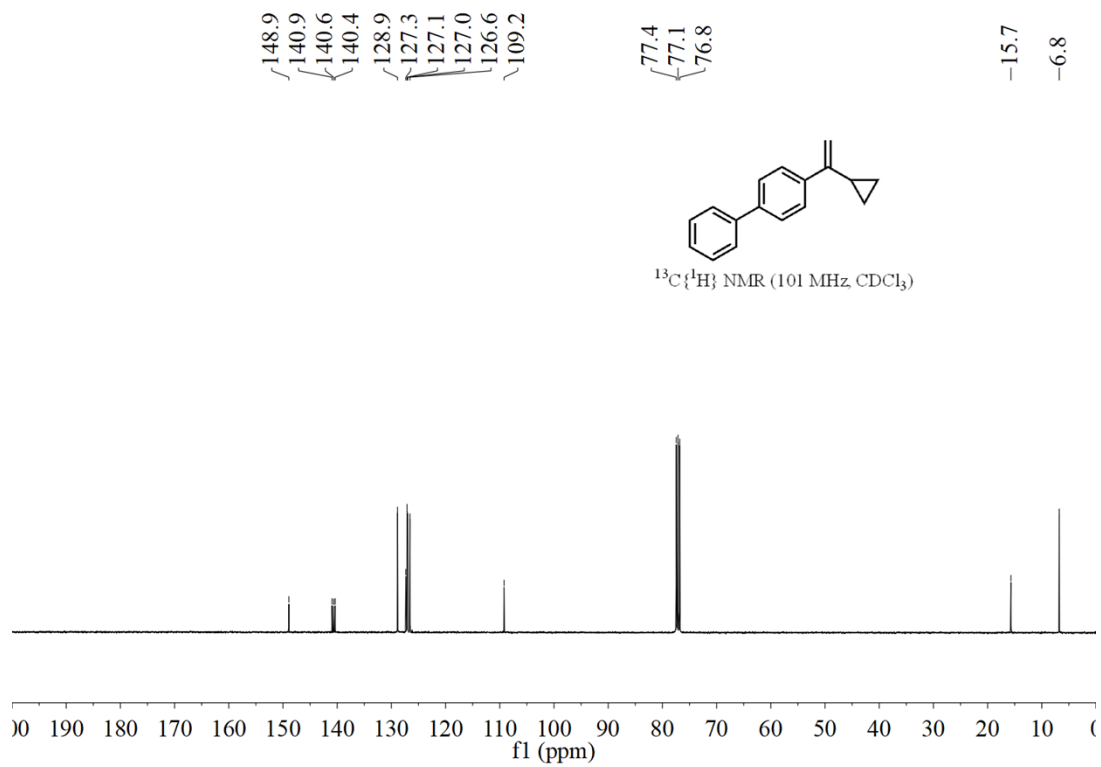

**1-Methyl-4-(1-phenylvinyl-2,2- $d_2$ )benzene (43)**

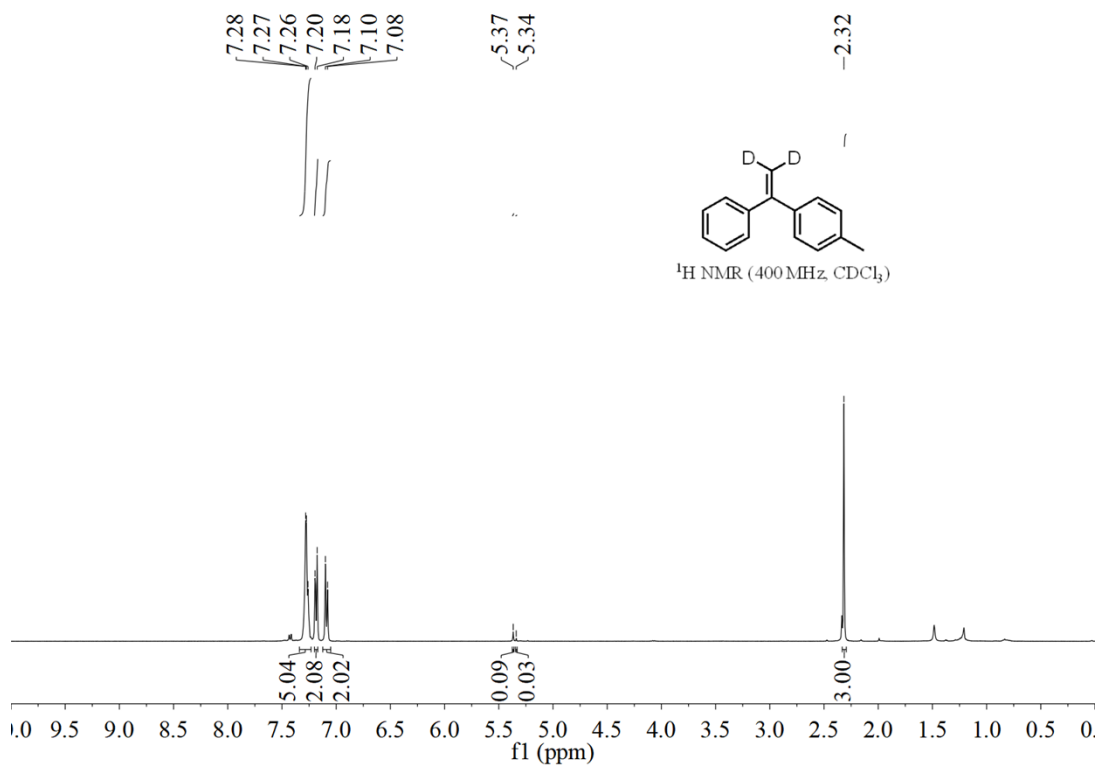



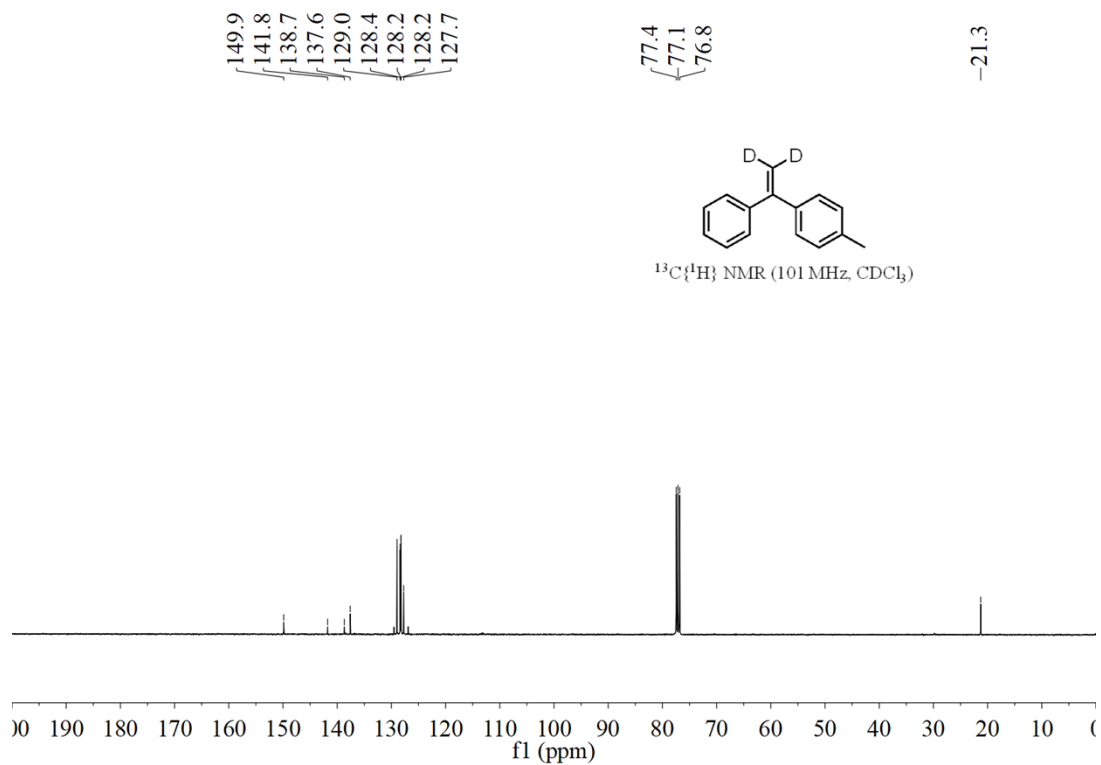

**1-Chloro-4-(1-(4-fluorophenyl)vinyl-2,2-d<sub>2</sub>)benzene (44)**

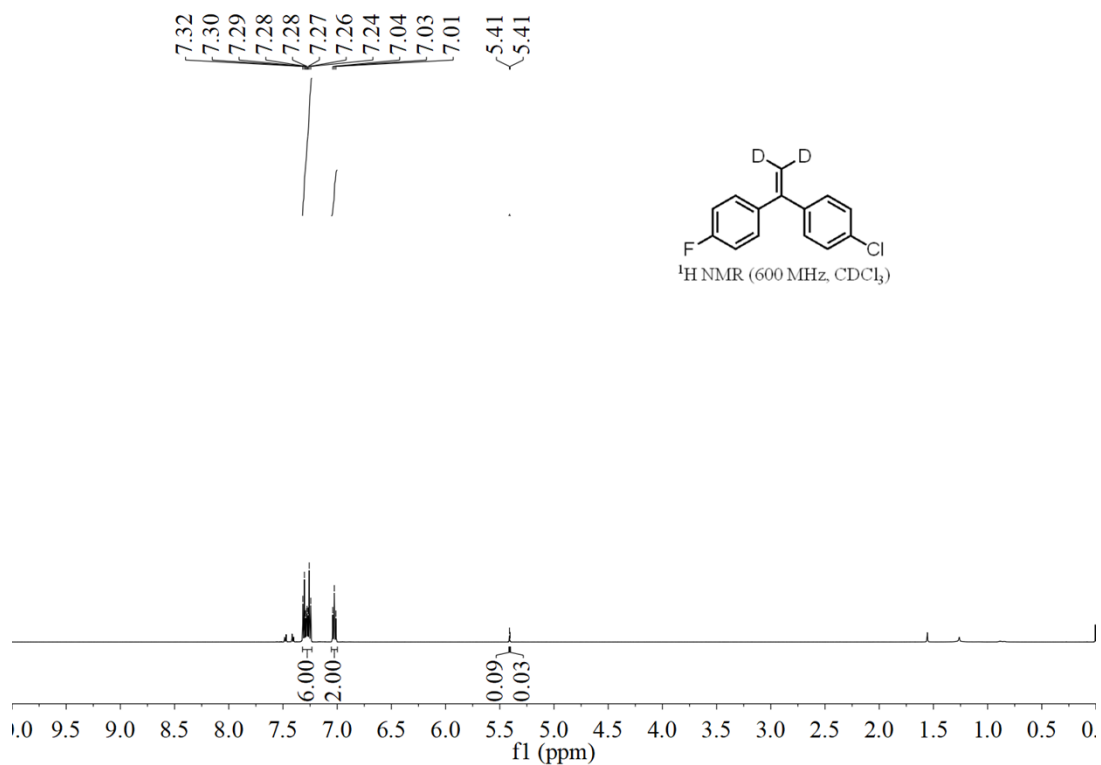

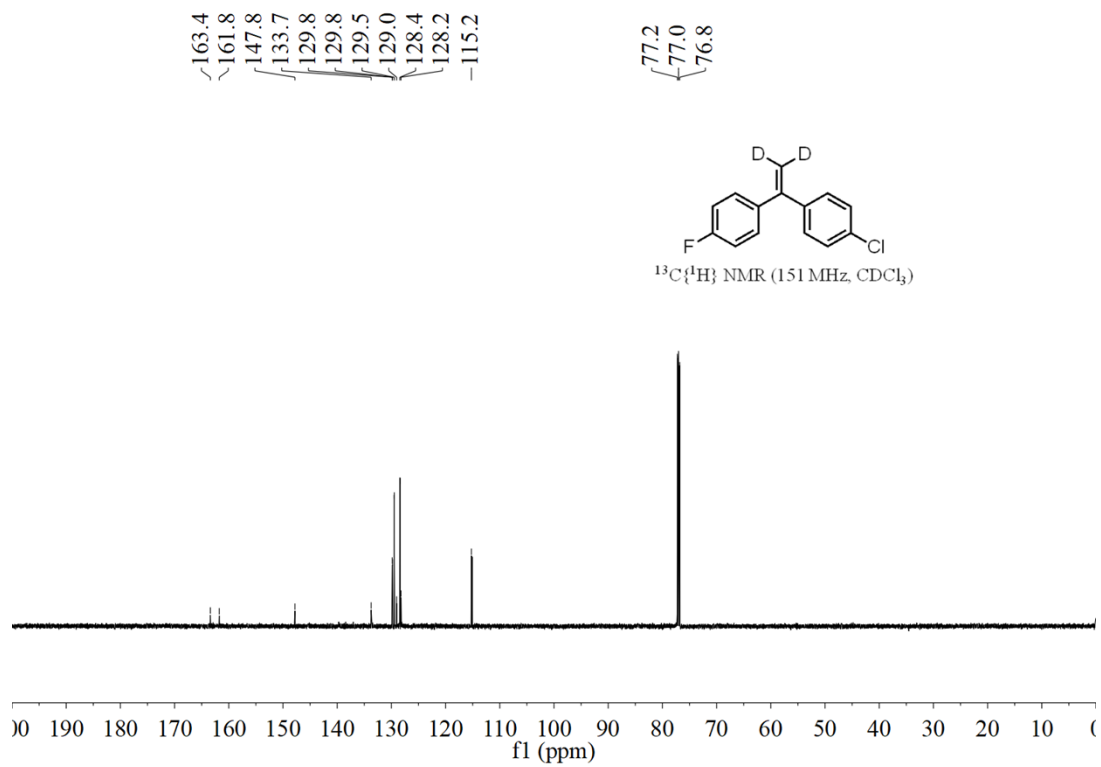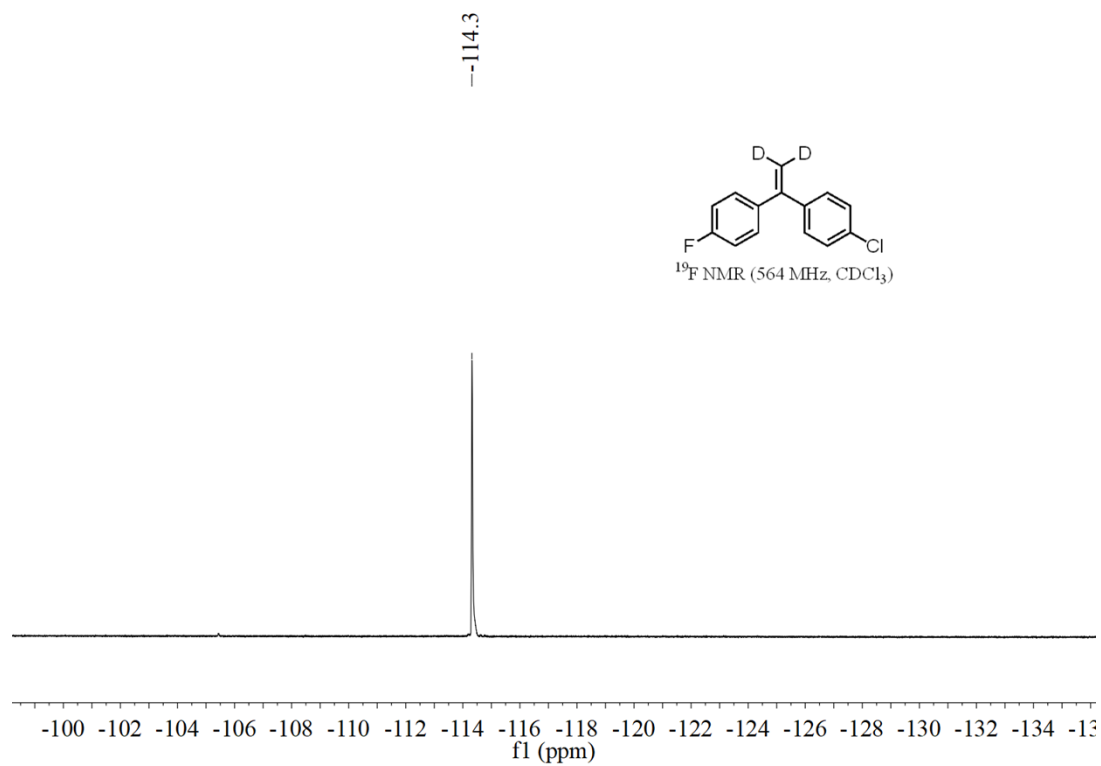

**1-(1-(4-Fluorophenyl)vinyl-2,2-*d*<sub>2</sub>)naphthalene (45)**

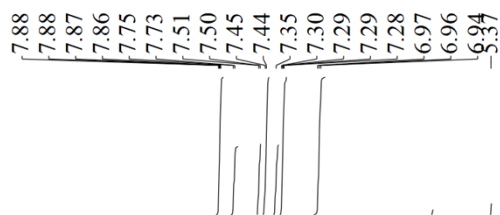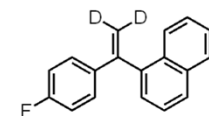

<sup>1</sup>H NMR (600 MHz, CDCl<sub>3</sub>)

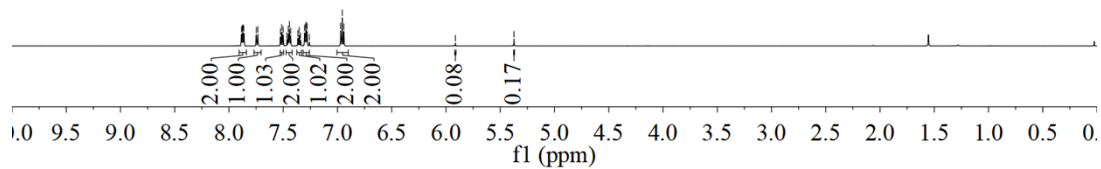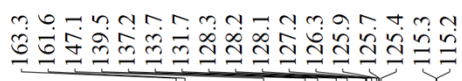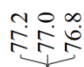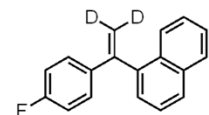

<sup>13</sup>C{<sup>1</sup>H} NMR (151 MHz, CDCl<sub>3</sub>)

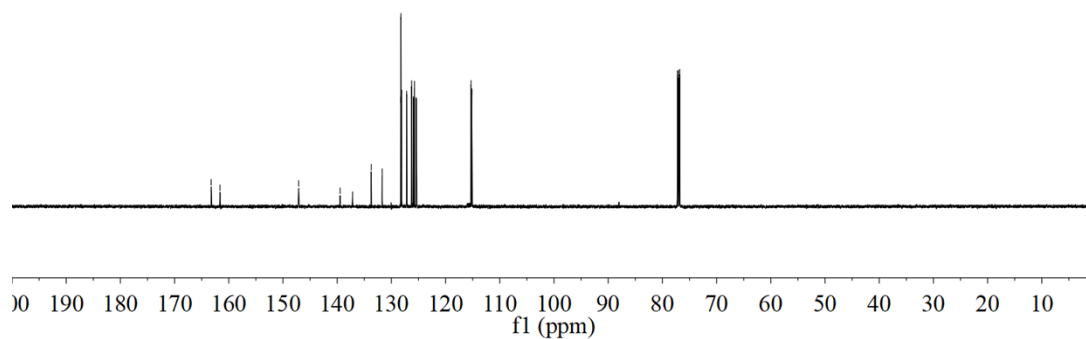

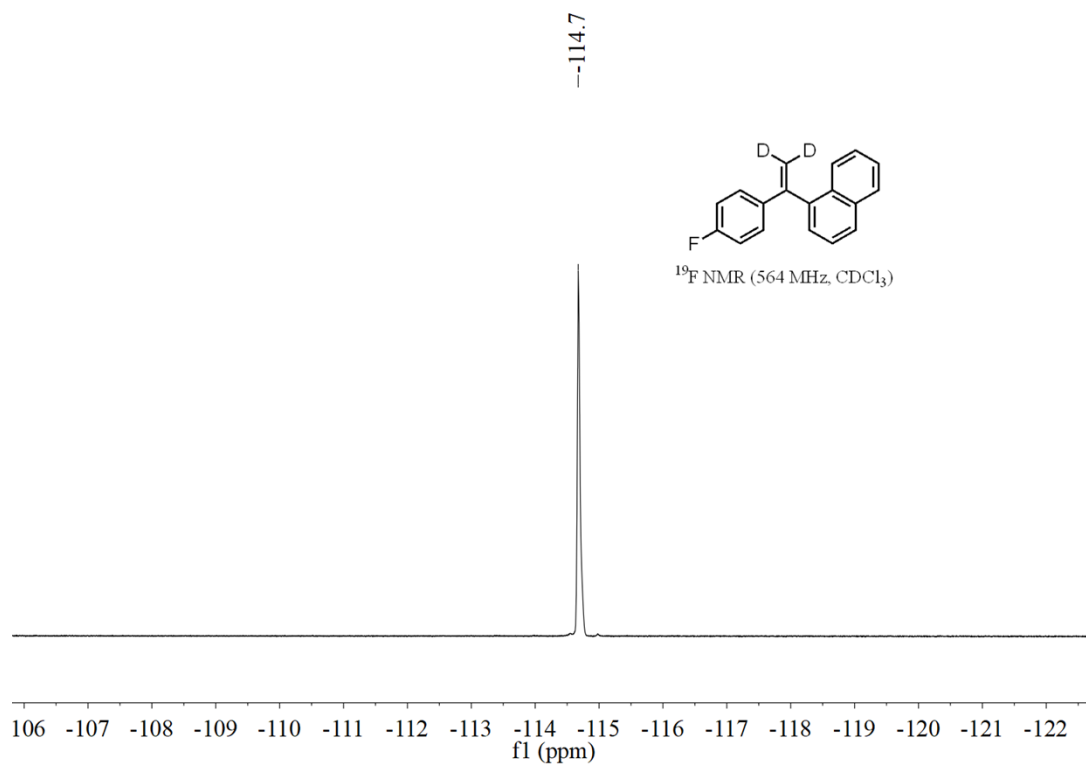

**1-Methyl-4-(1-(4-(trifluoromethyl)phenyl)vinyl)-2,2-d<sub>2</sub>)benzene (46)**

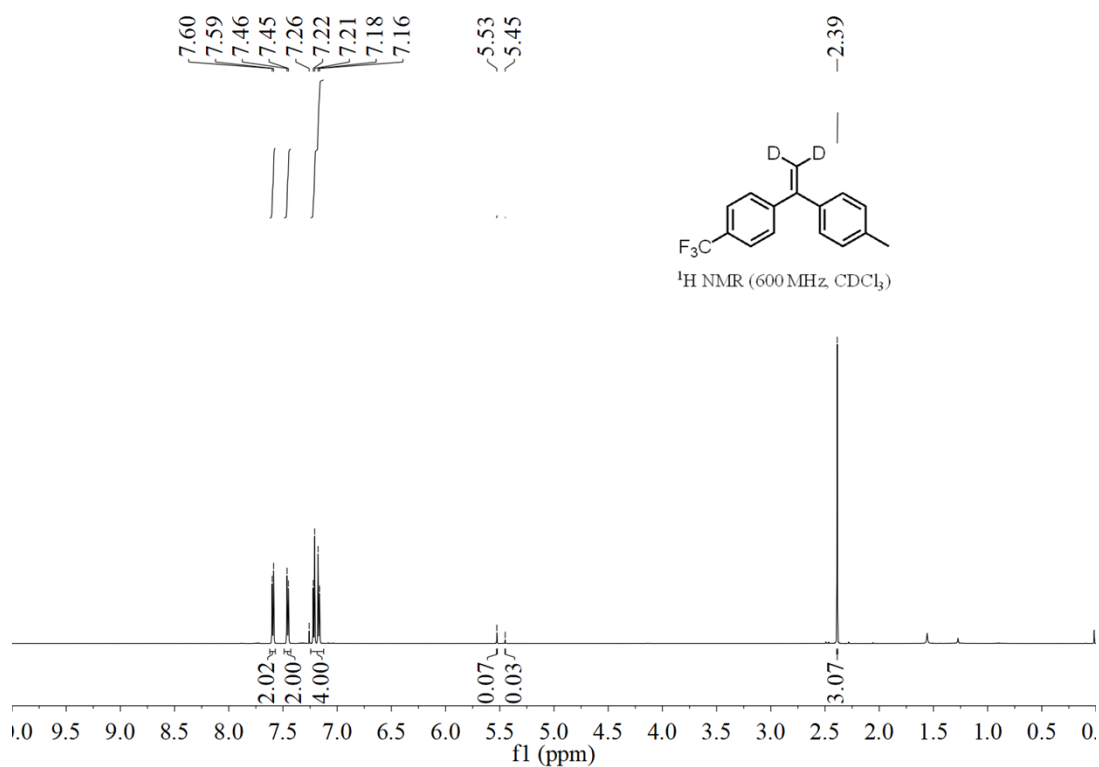

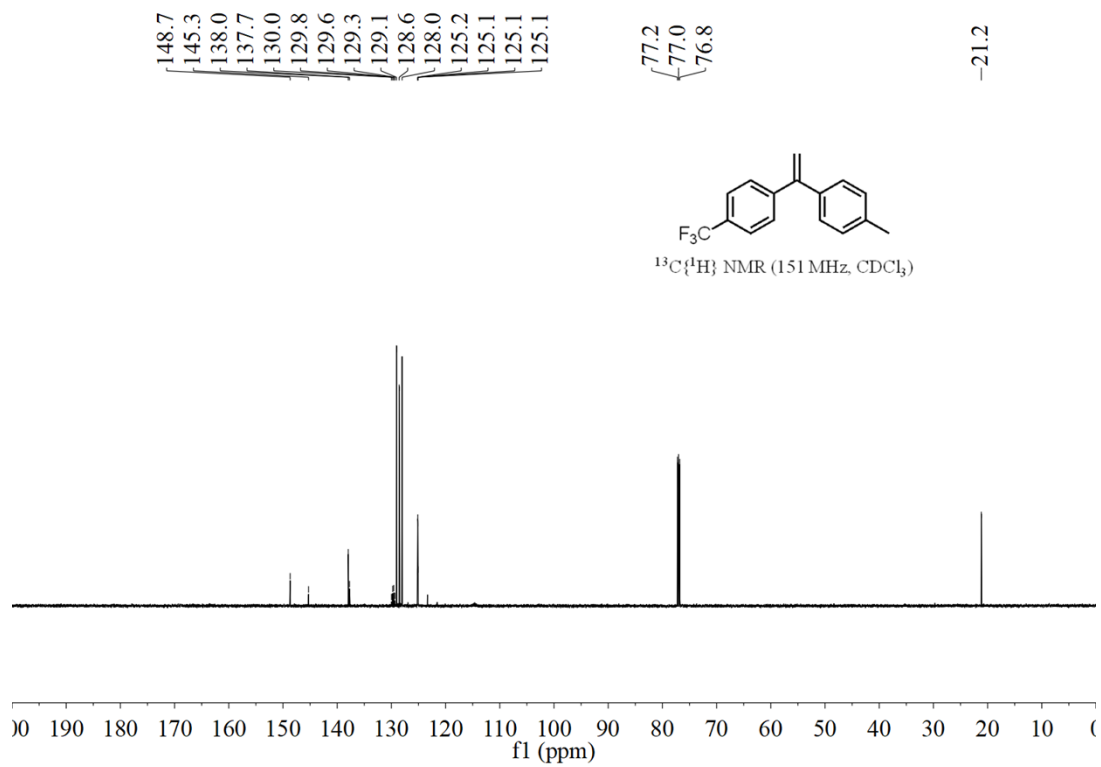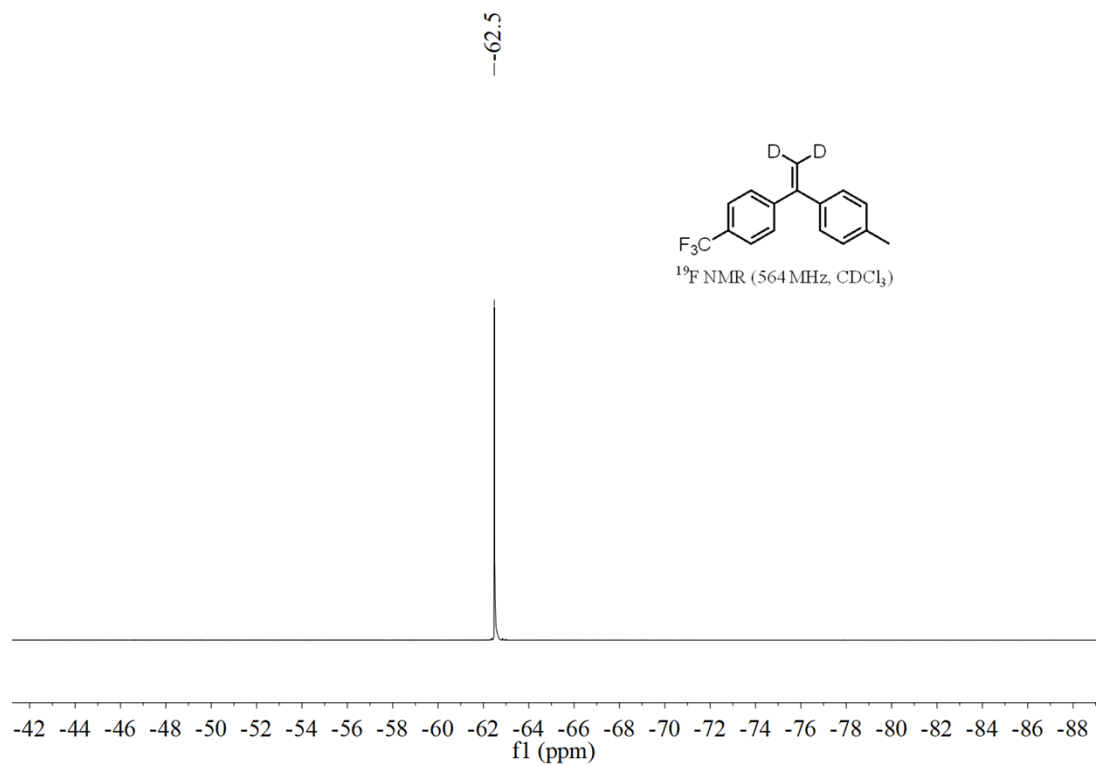

1-(Tert-butyl)-4-(1-(4-(trifluoromethyl)phenyl)vinyl-2,2-*d*<sub>2</sub>)benzene (47)

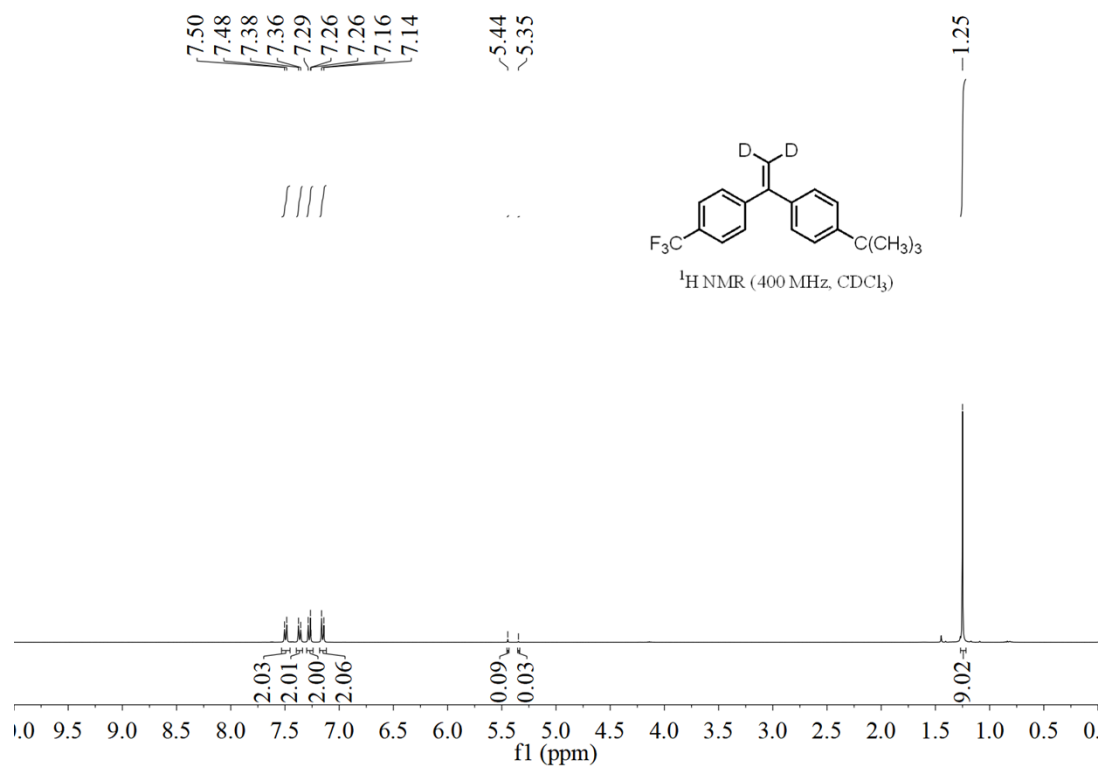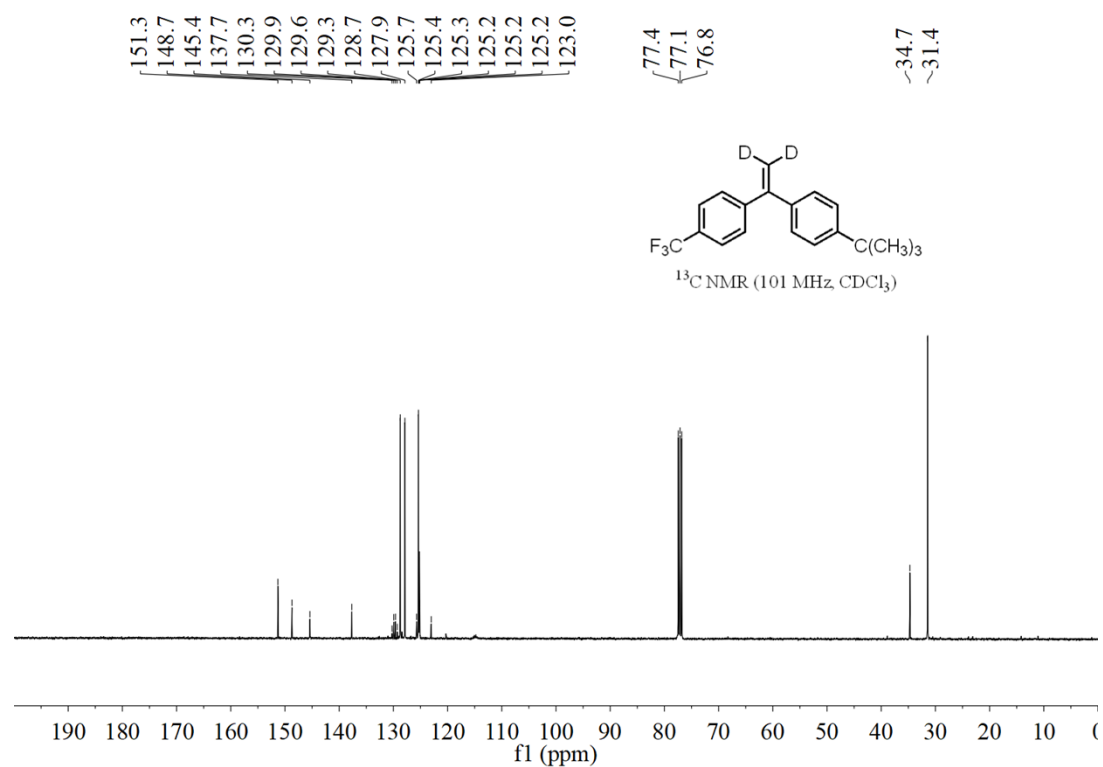

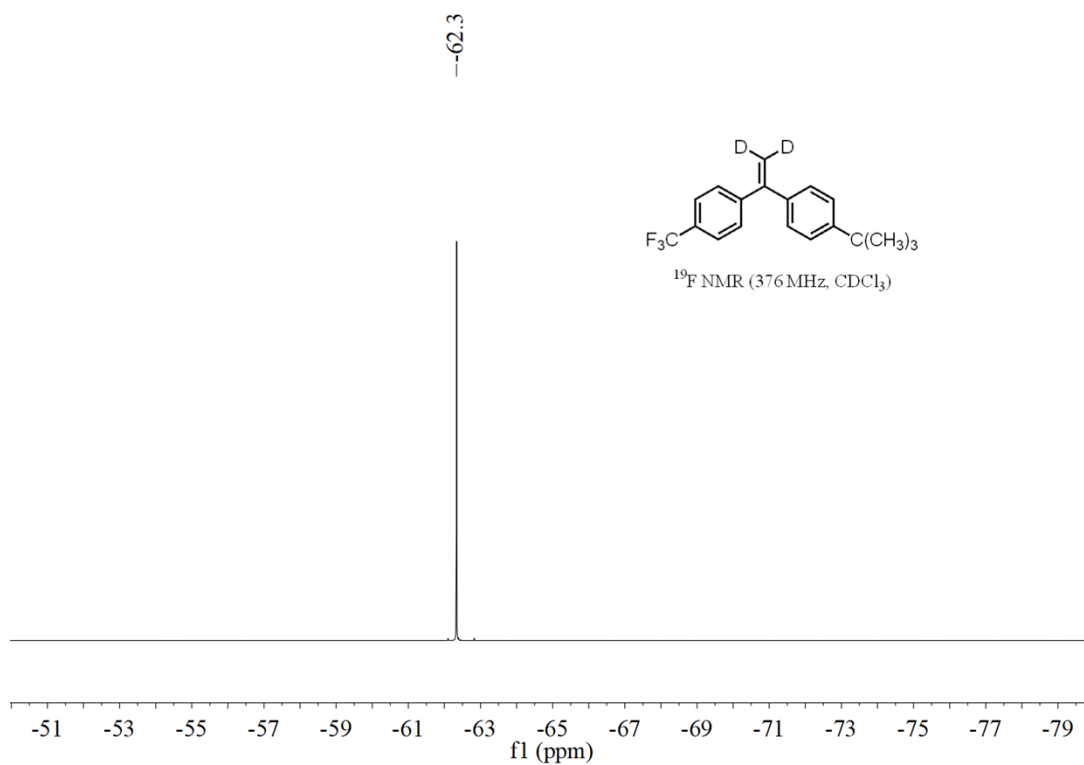

**1-(4-(1-(3-Methoxyphenyl)vinyl-2,2-d<sub>2</sub>)phenyl)ethan-1-one (48)**

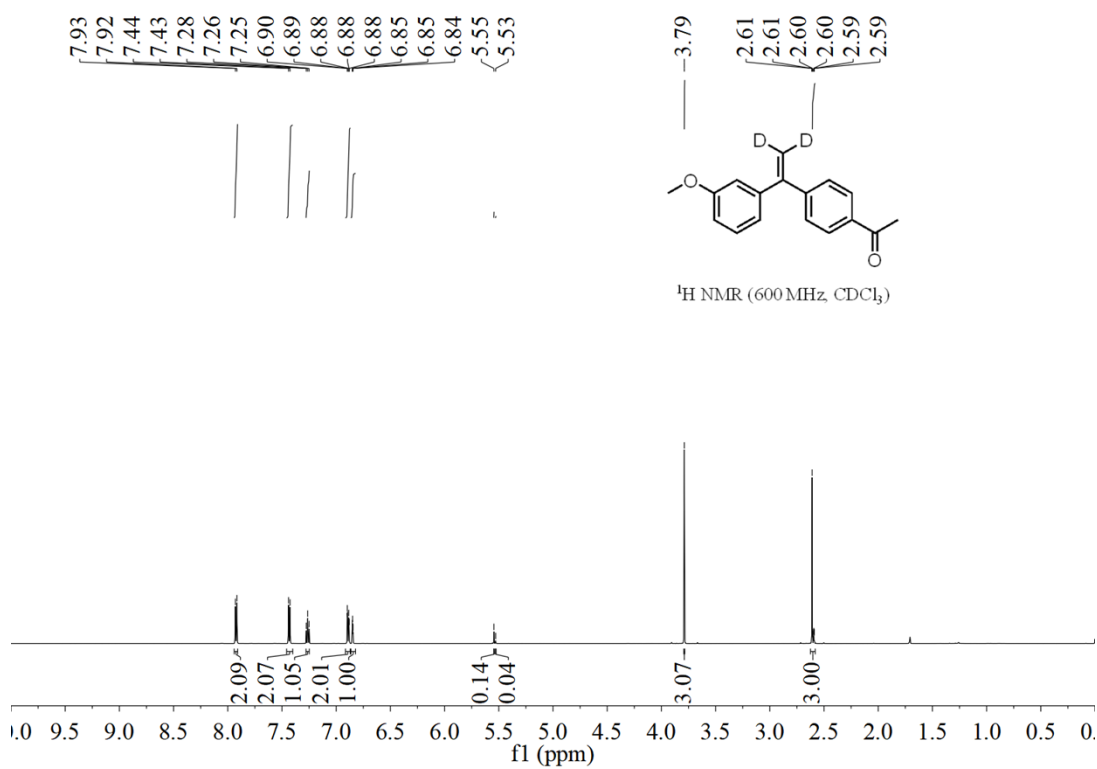

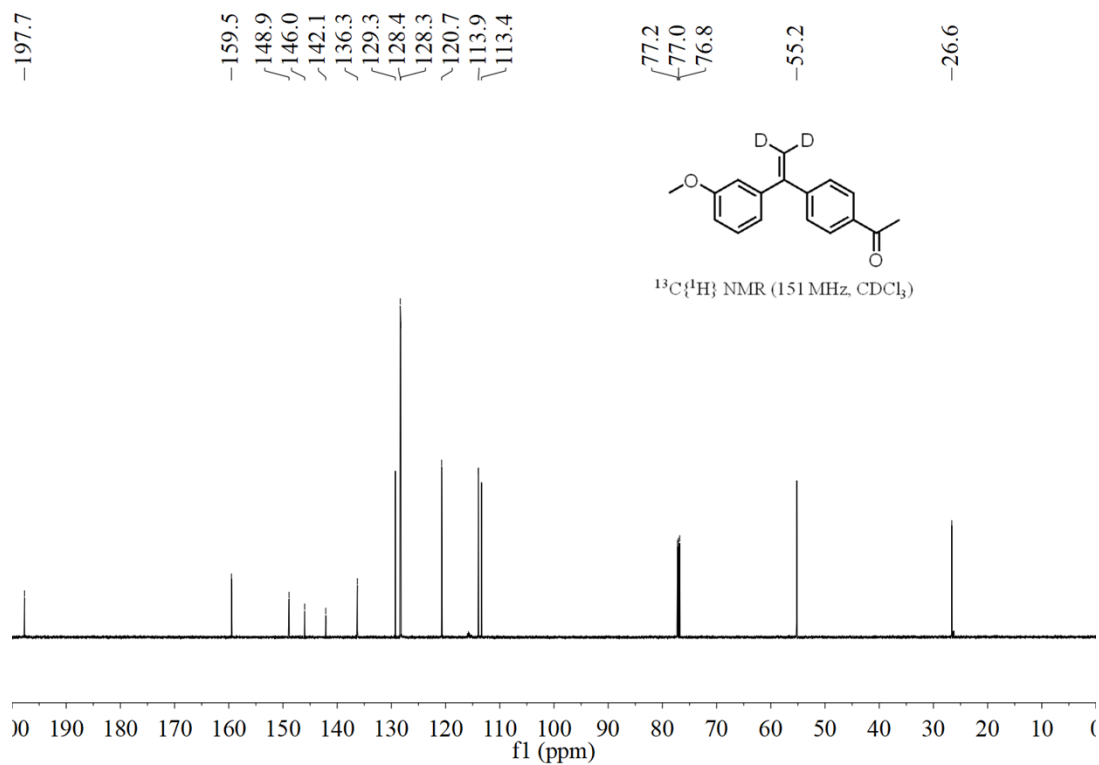

**1-Methoxy-3-(oct-1-en-2-yl-1,1-d<sub>2</sub>)benzene (49)**

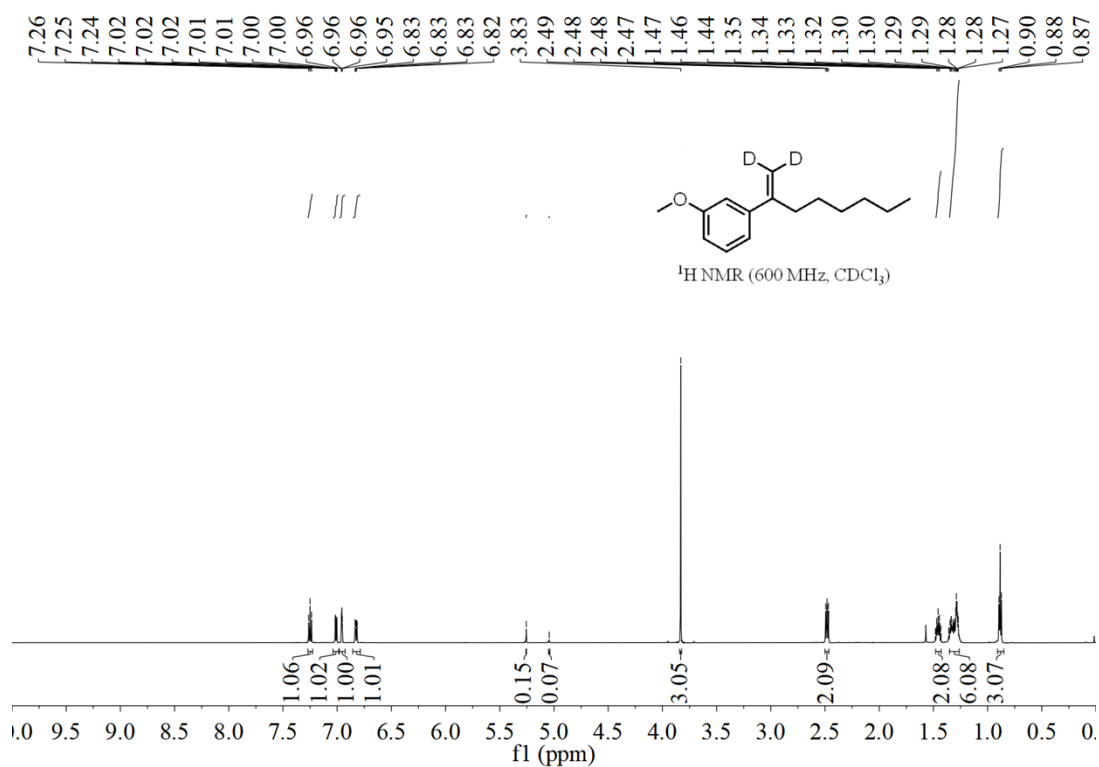



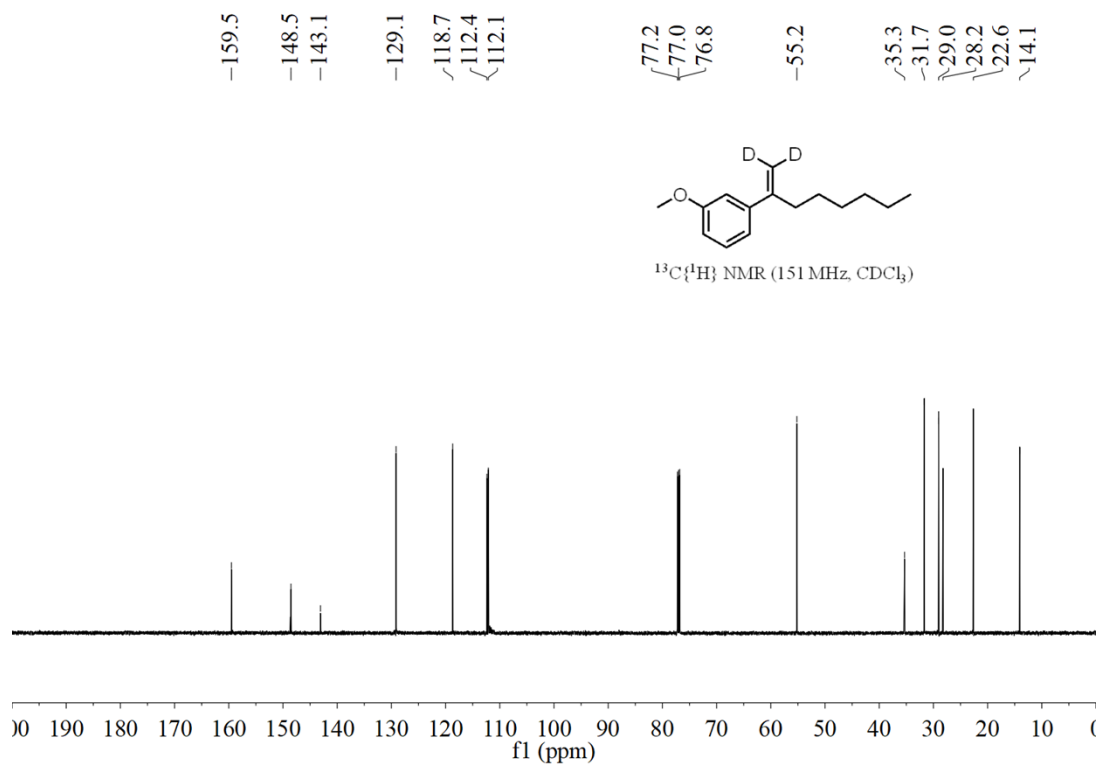

**2,4-Dichloro-1-(oct-1-en-2-yl-1,1-d<sub>2</sub>)benzene (50)**

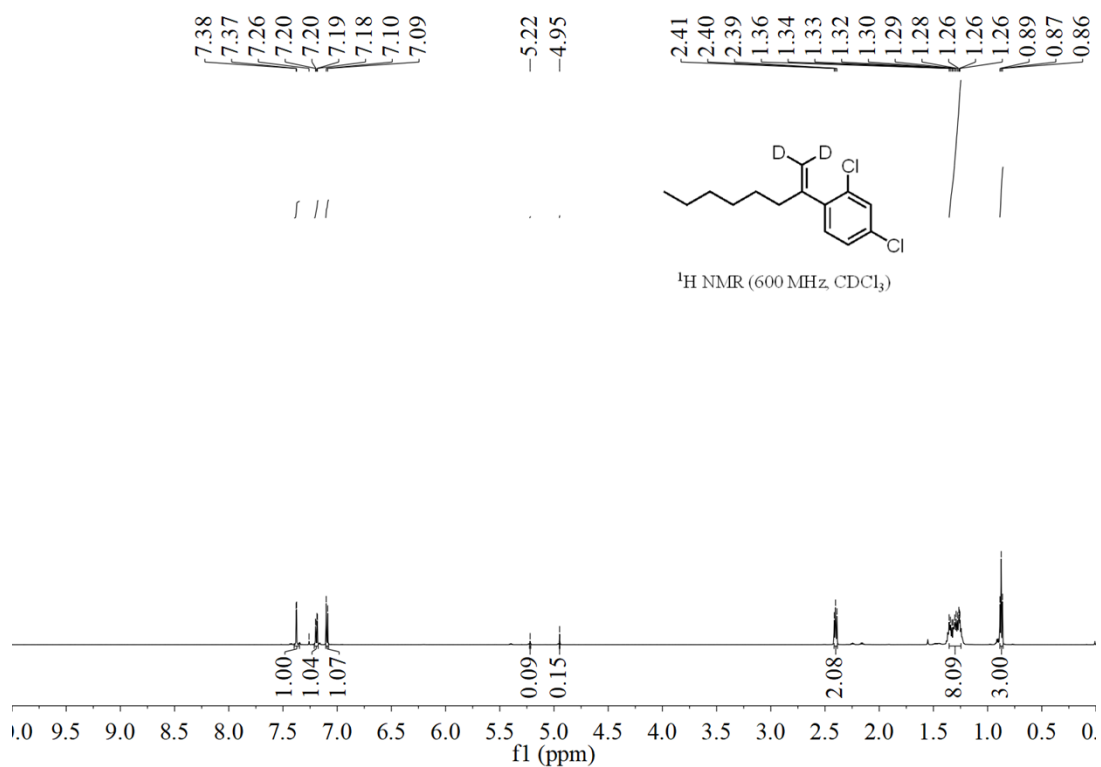

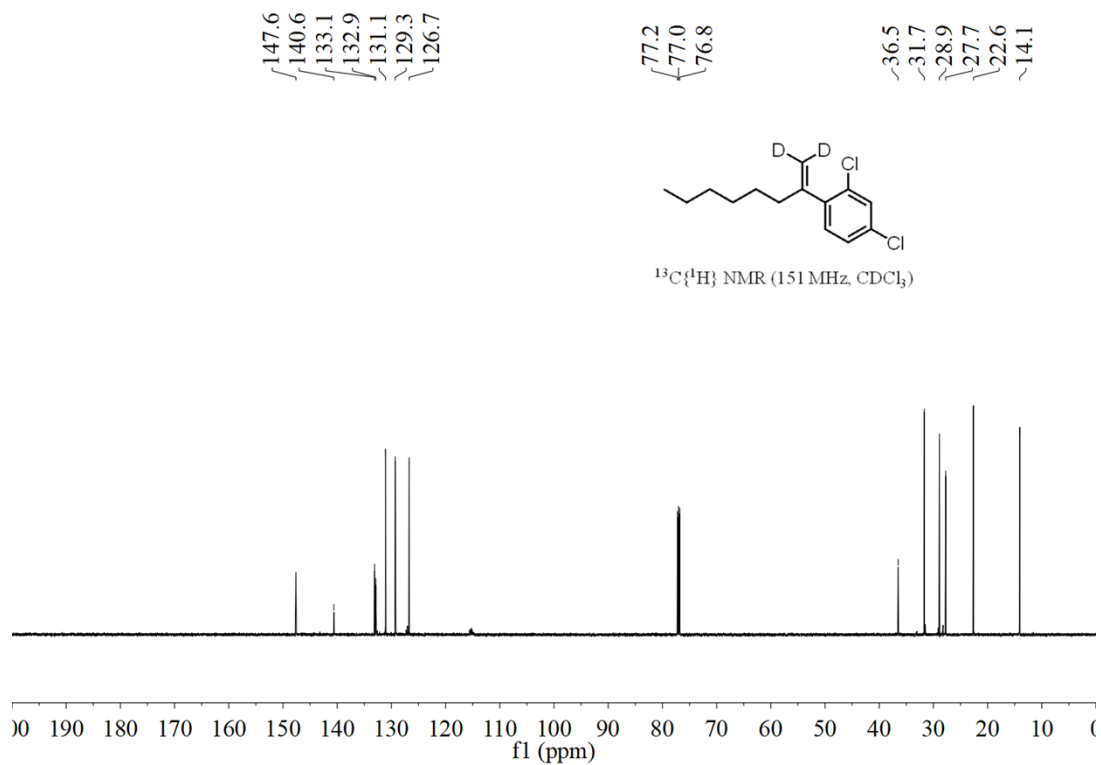

**(4-(1-Cyclopropylvinyl-2,2-d<sub>2</sub>)phenyl)trimethylsilane (51)**

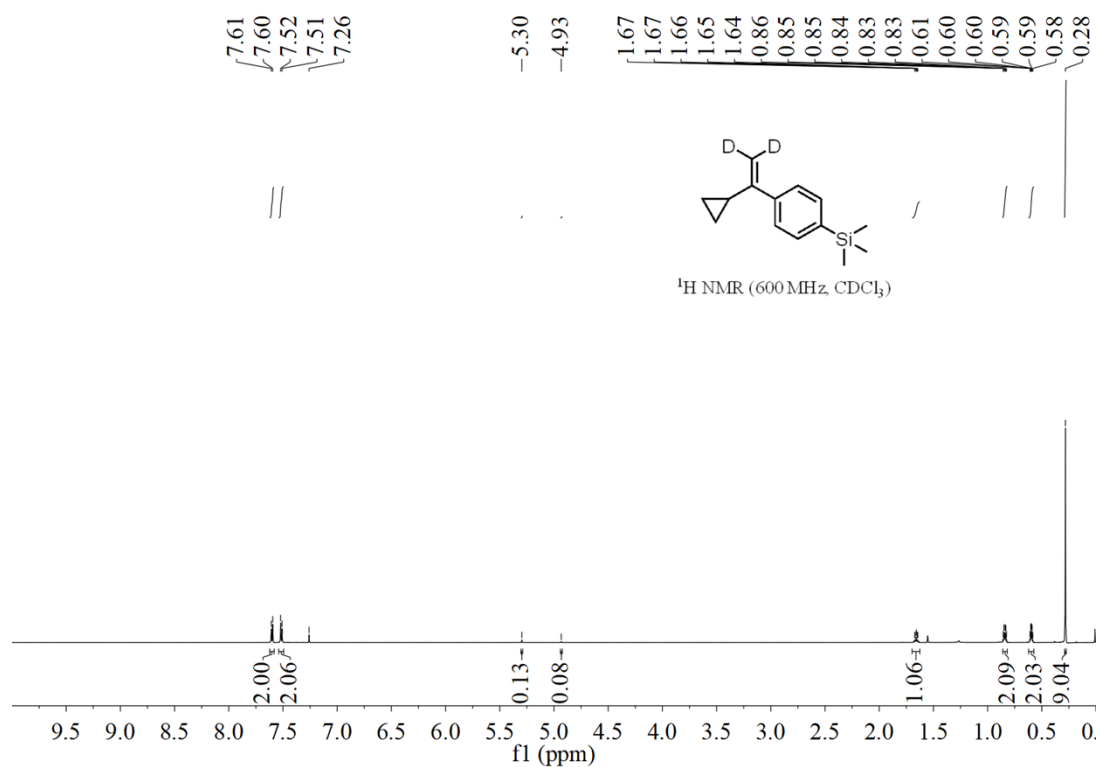

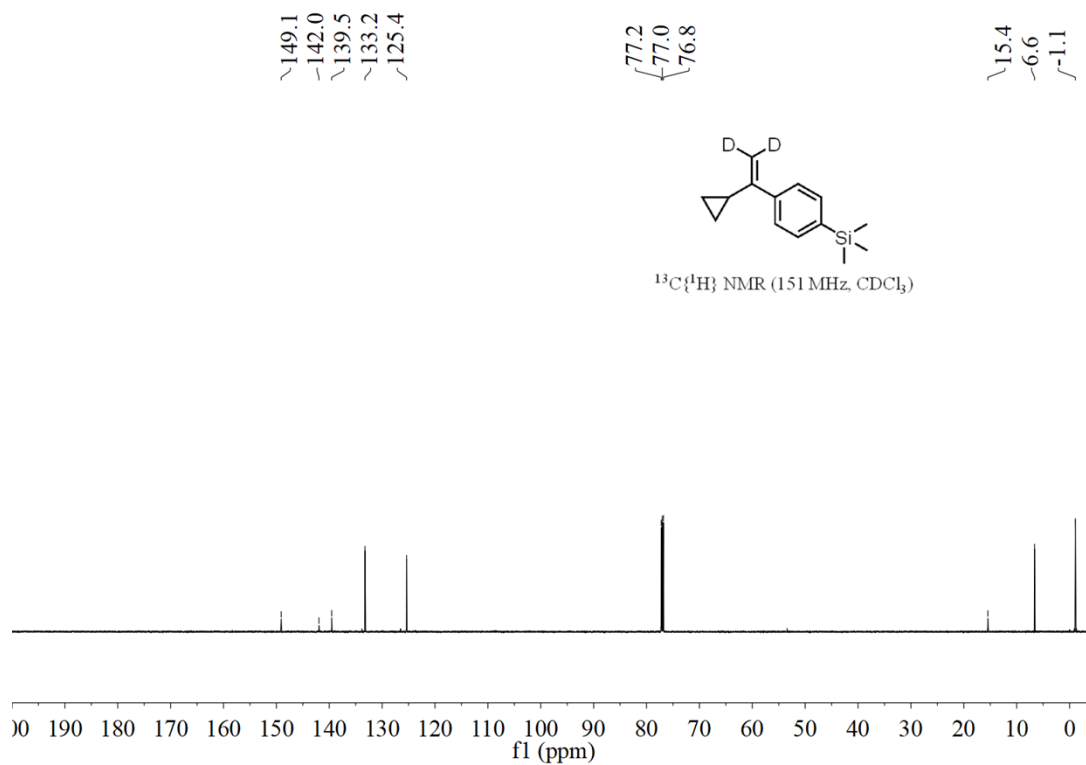

**4-(Ethynyl-*d*)-1,1'-biphenyl (53)**

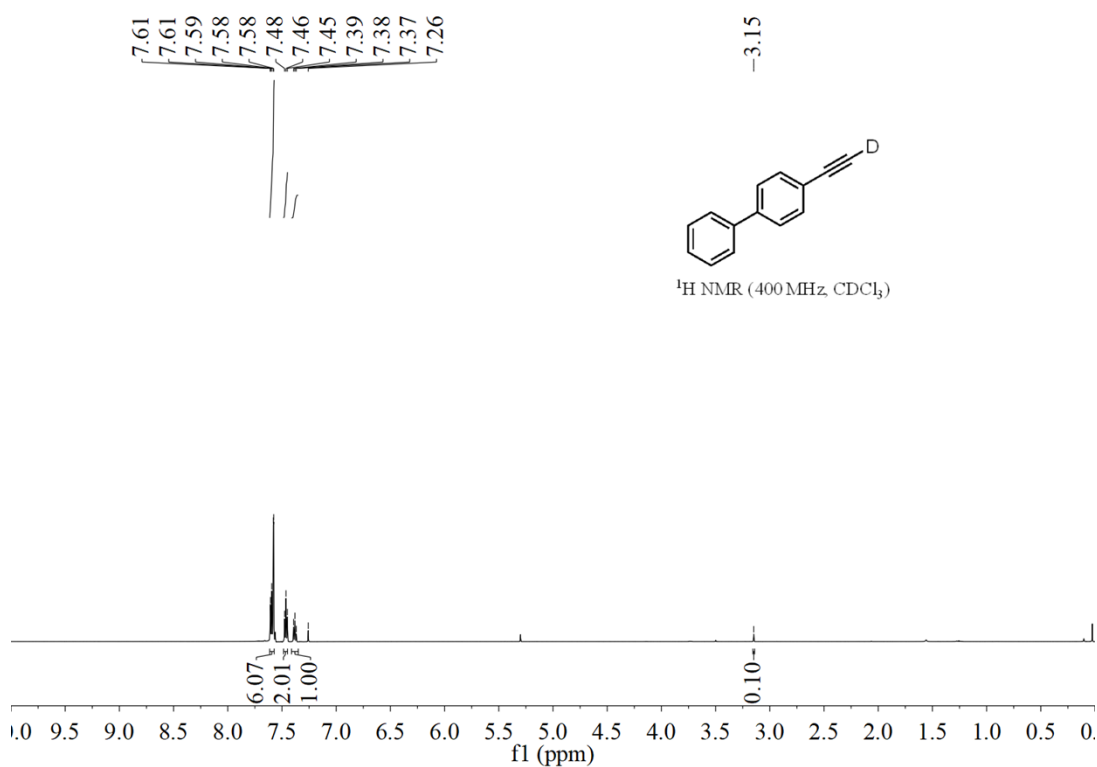

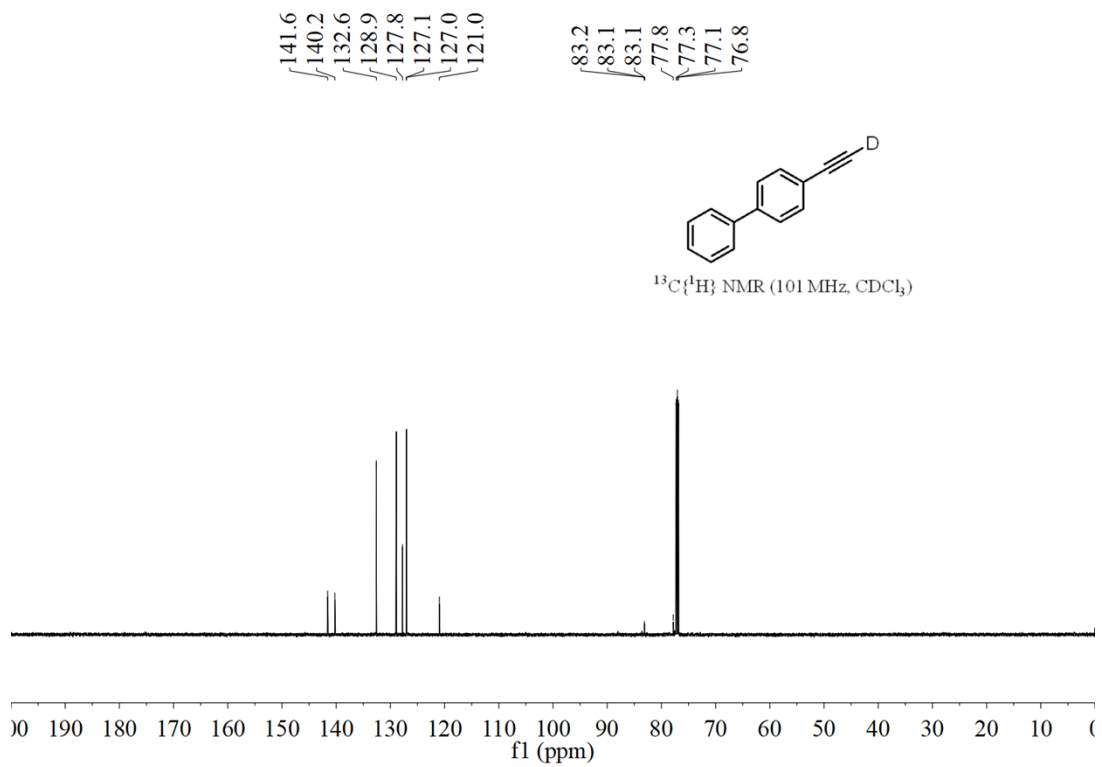

**3,3-Diphenylacrylic acid (55)**

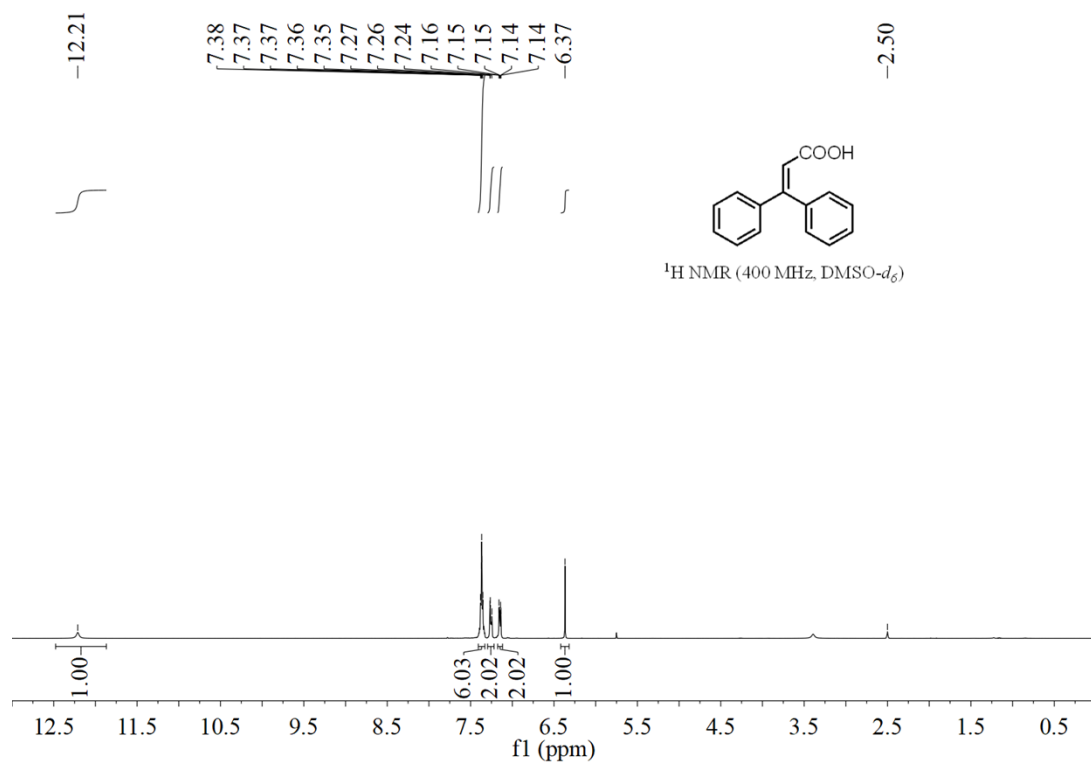

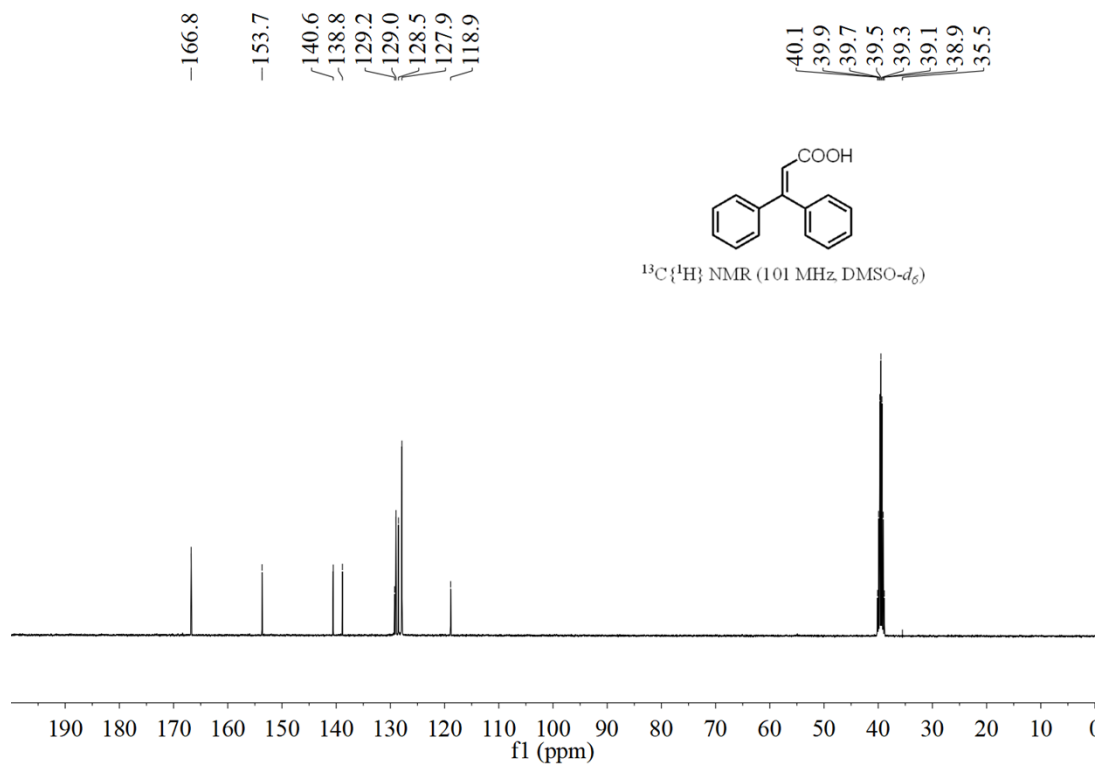

**(Ethynyl-*d*)benzene (57)**

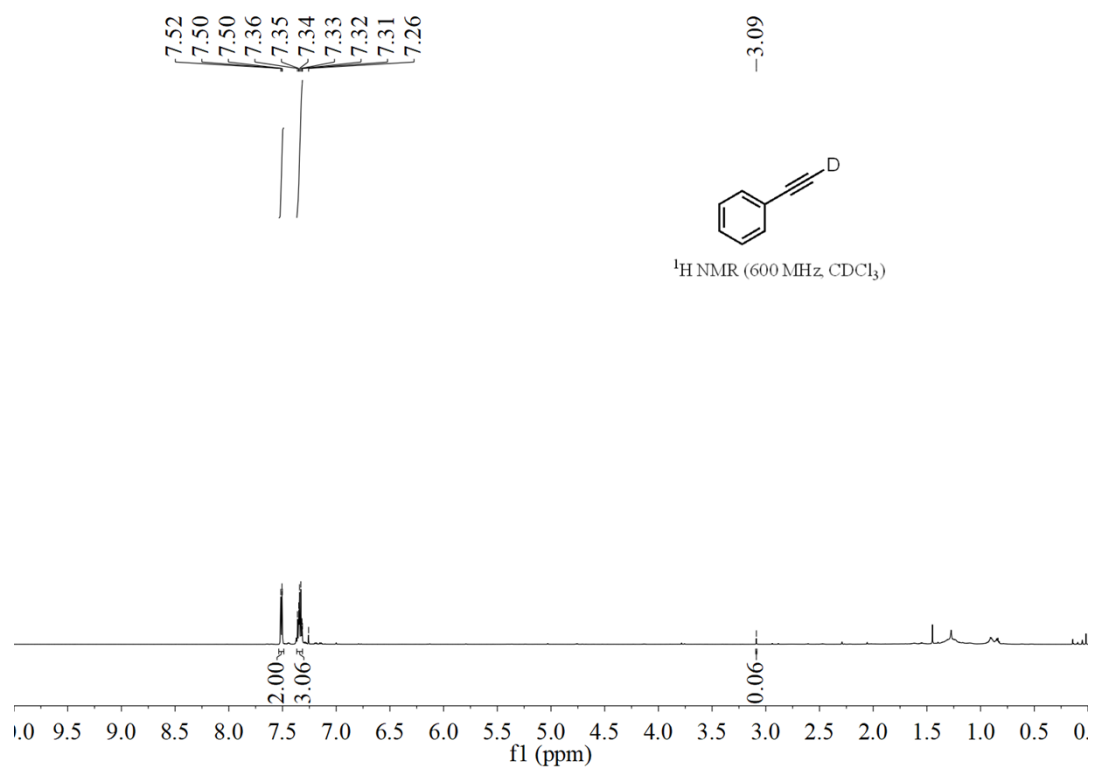

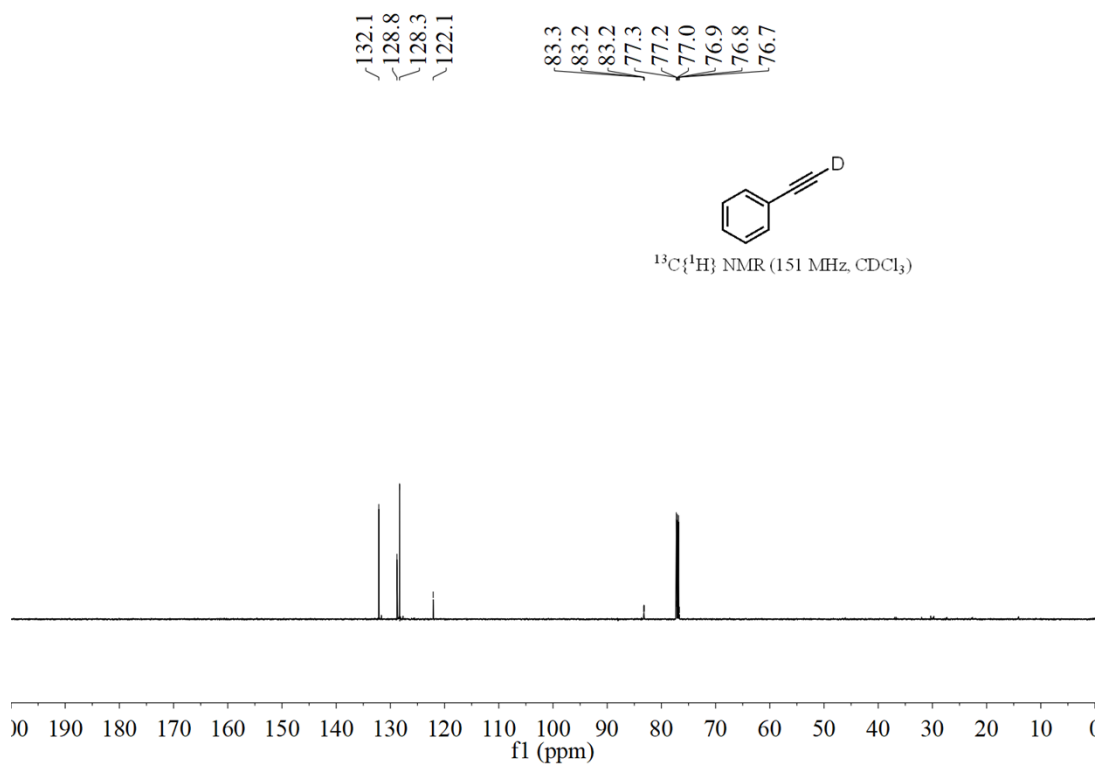

**(E)-1-methyl-4-(1-phenylvinyl-2-*d*)benzene (58)**

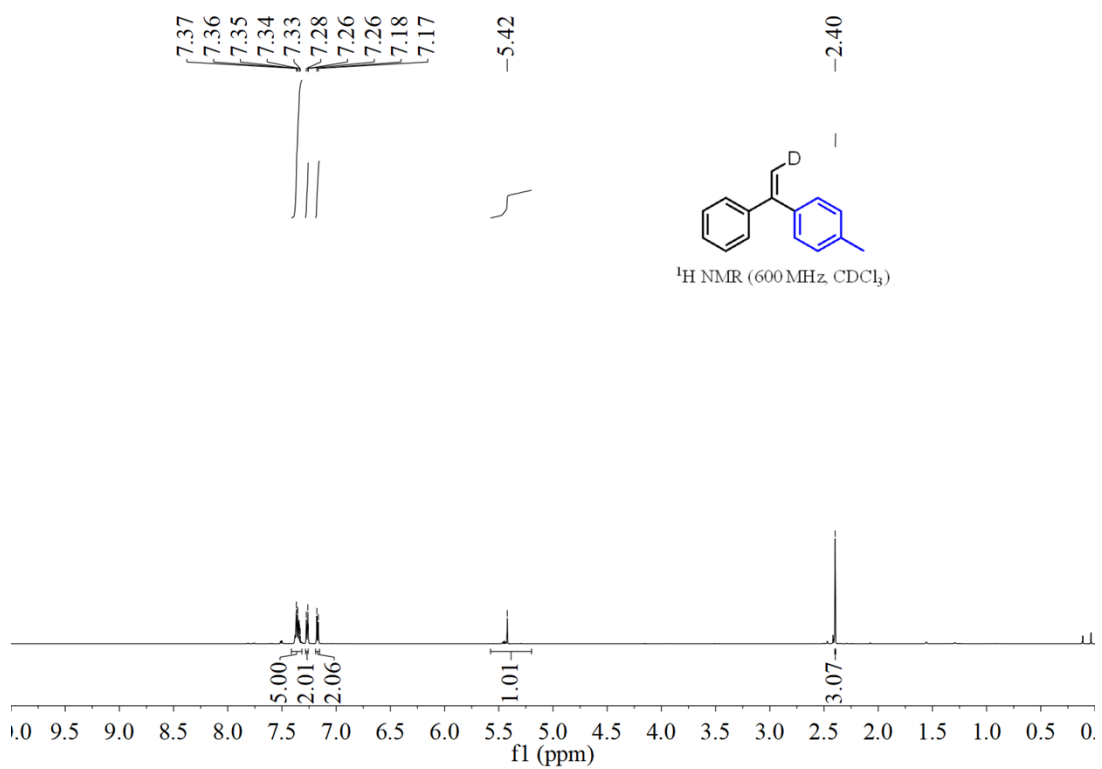

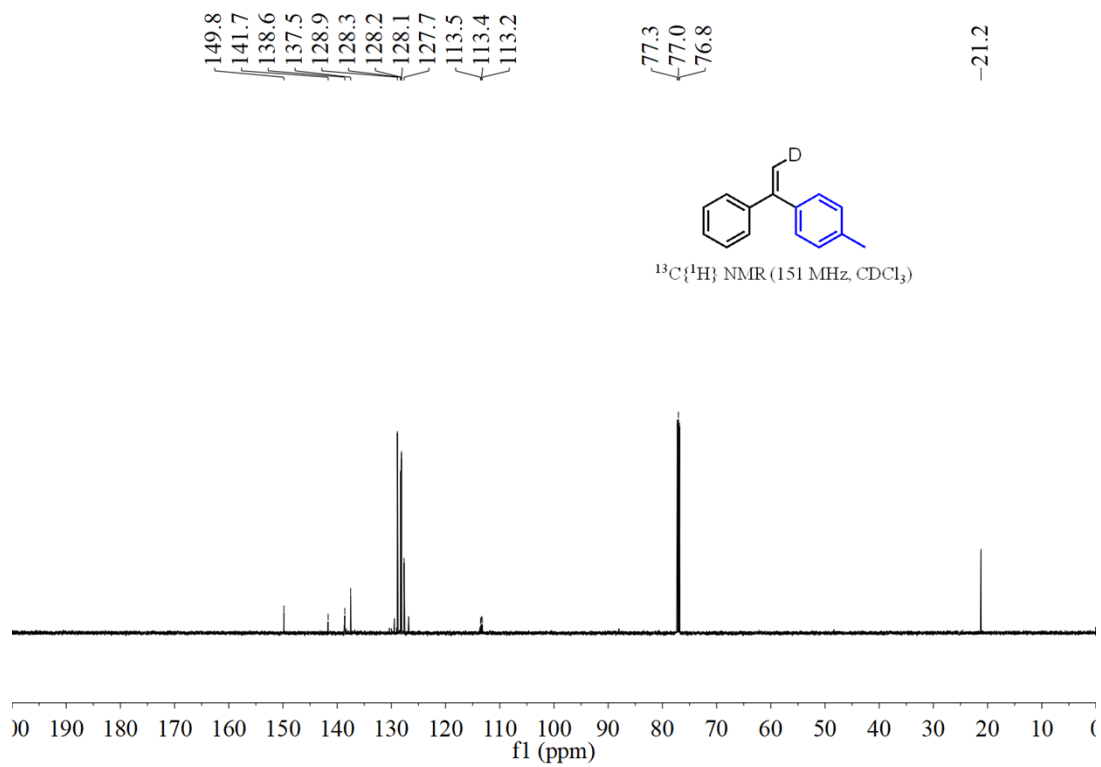

Supplement: d3ob00454f1.pdf [file d3ob00454f1.pdf]
